# Supplementary material for: Synthesis and Activity Evaluation of Vinpocetine-Derived Indole Alkaloids
Source: MDPI journal article supplement (doi:10.3390/molecules29010014), 2023-12-19
Supplement: s1 [file s1]

# Synthesis and Activity Evaluation of Vinpocetine-Derived Indole Alkaloids

Zhang-Chao Dong<sup>1,†</sup>, Yang Shi<sup>1,†</sup>, Liang-Liang Zheng<sup>1</sup>, You-Ping Tian<sup>1</sup>, Jian Yang<sup>3</sup>, Ying Wei<sup>1</sup>, Ying Zhou<sup>1,\*</sup>  
and Bo-Wen Pan<sup>1,2\*</sup>

Zhang-Chao Dong <sup>1,†</sup>, Yang Shi <sup>1,†</sup>, Liang-Liang Zheng <sup>1</sup>, You-Ping Tian <sup>1</sup>, Jian Yang <sup>2</sup>, Ying Wei <sup>1</sup>, Ying Zhou <sup>1,\*</sup>  
and Bo-Wen Pan <sup>1,3,\*</sup>

<sup>1</sup> College of Pharmacy, Guizhou University of Traditional Chinese Medicine, Guiyang 550025, China; weiyang1969@126.com (Y.W.); dongzhangchao0824@163.com (Z.-C.D.); xiaoyewater@163.com (Y.S.); zxl5117508142@163.com (L.-L.Z.); nanshan-tia@163.com (Y.-P.T.); weiyang479@gzy.edu.cn (Y.W.)

<sup>2</sup> College of Pharmacy and Nutrition, University of Saskatchewan, Saskatoon, SK S7N 5E5, Canada; jian.yang@usask.ca

<sup>3</sup> State Key Laboratory of Natural and Biomimetic Drugs, School of Pharmaceutical Sciences, Peking University, Beijing 100191, China

\* Correspondence: bwpan@gzy.edu.cn (B.W.P.); zhouying067@gzy.edu.cn (Y.Z.); Tel.: +86-0851-88233090 (Y.Z.)

† These authors contributed equally to this work.

| Contents                | Page |
|-------------------------|------|
| 1. NMR and HRMS spectra | 2–79 |

## 1. NMR and HRMS spectra

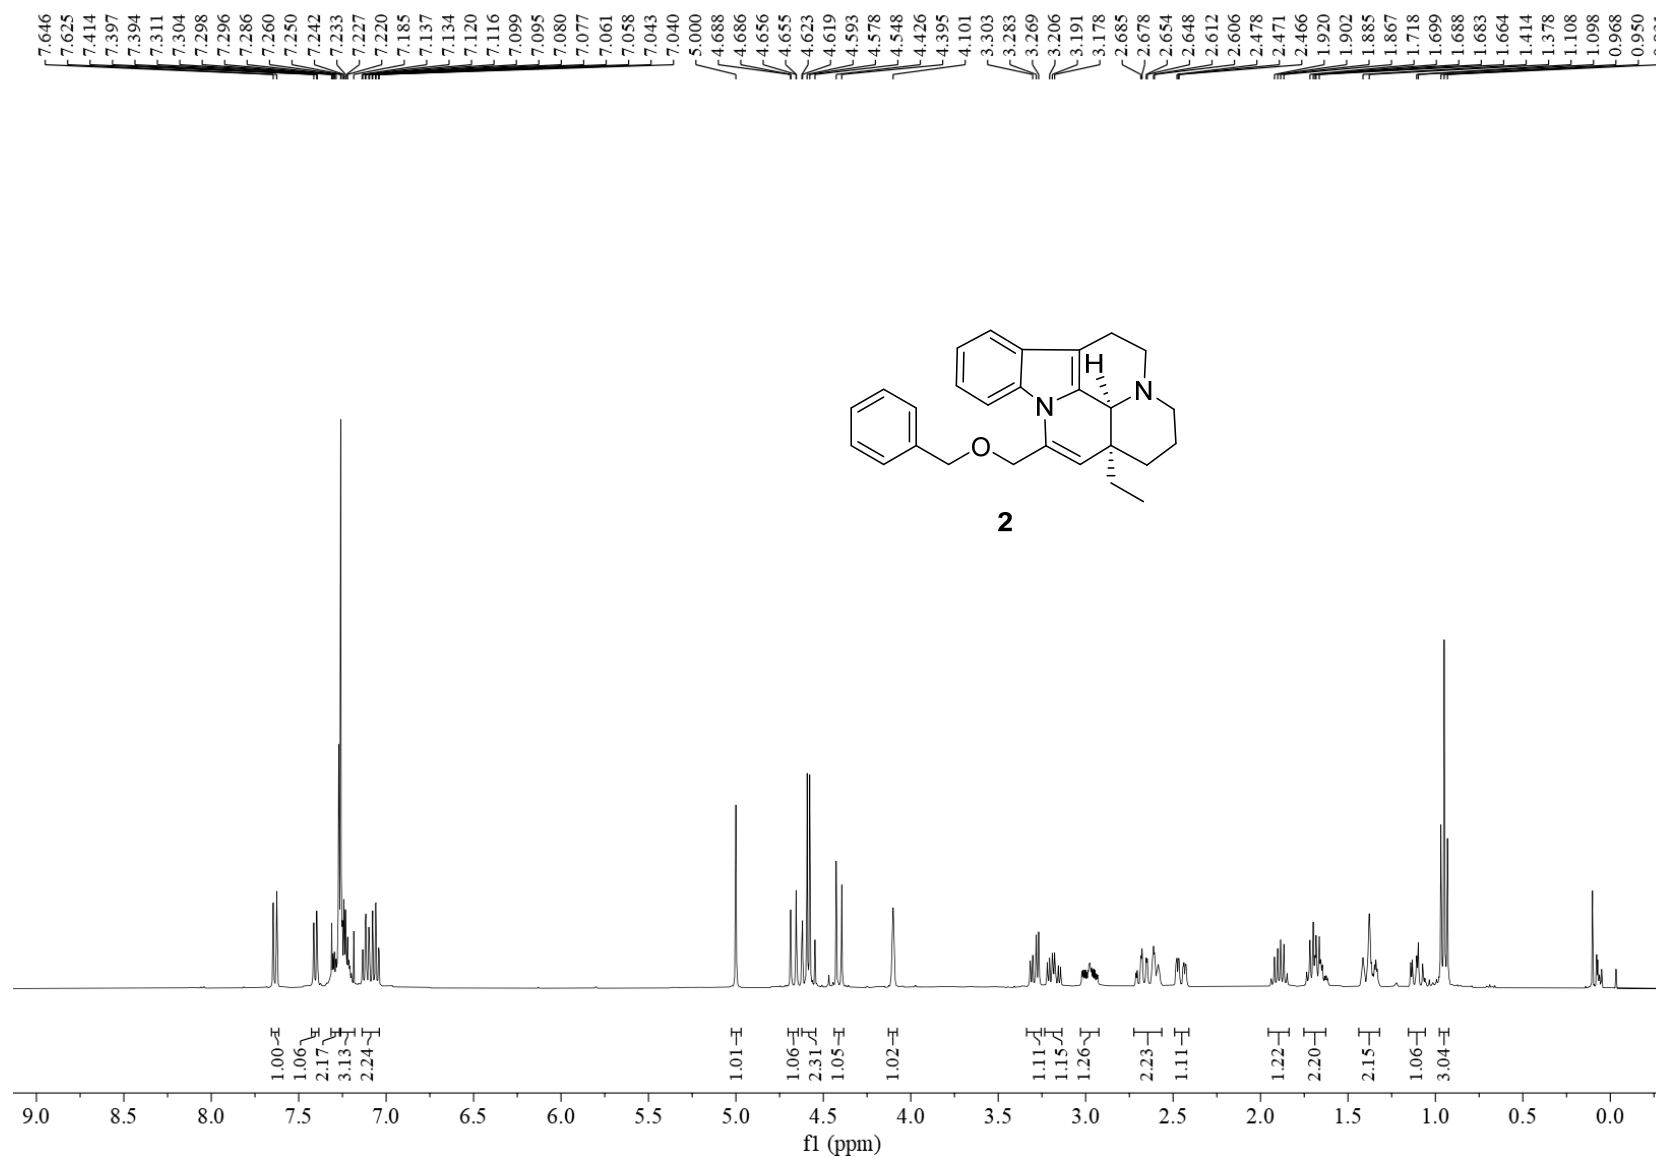

$^1\text{H}$  NMR of Compound **2** (400 MHz,  $\text{CDCl}_3$ )

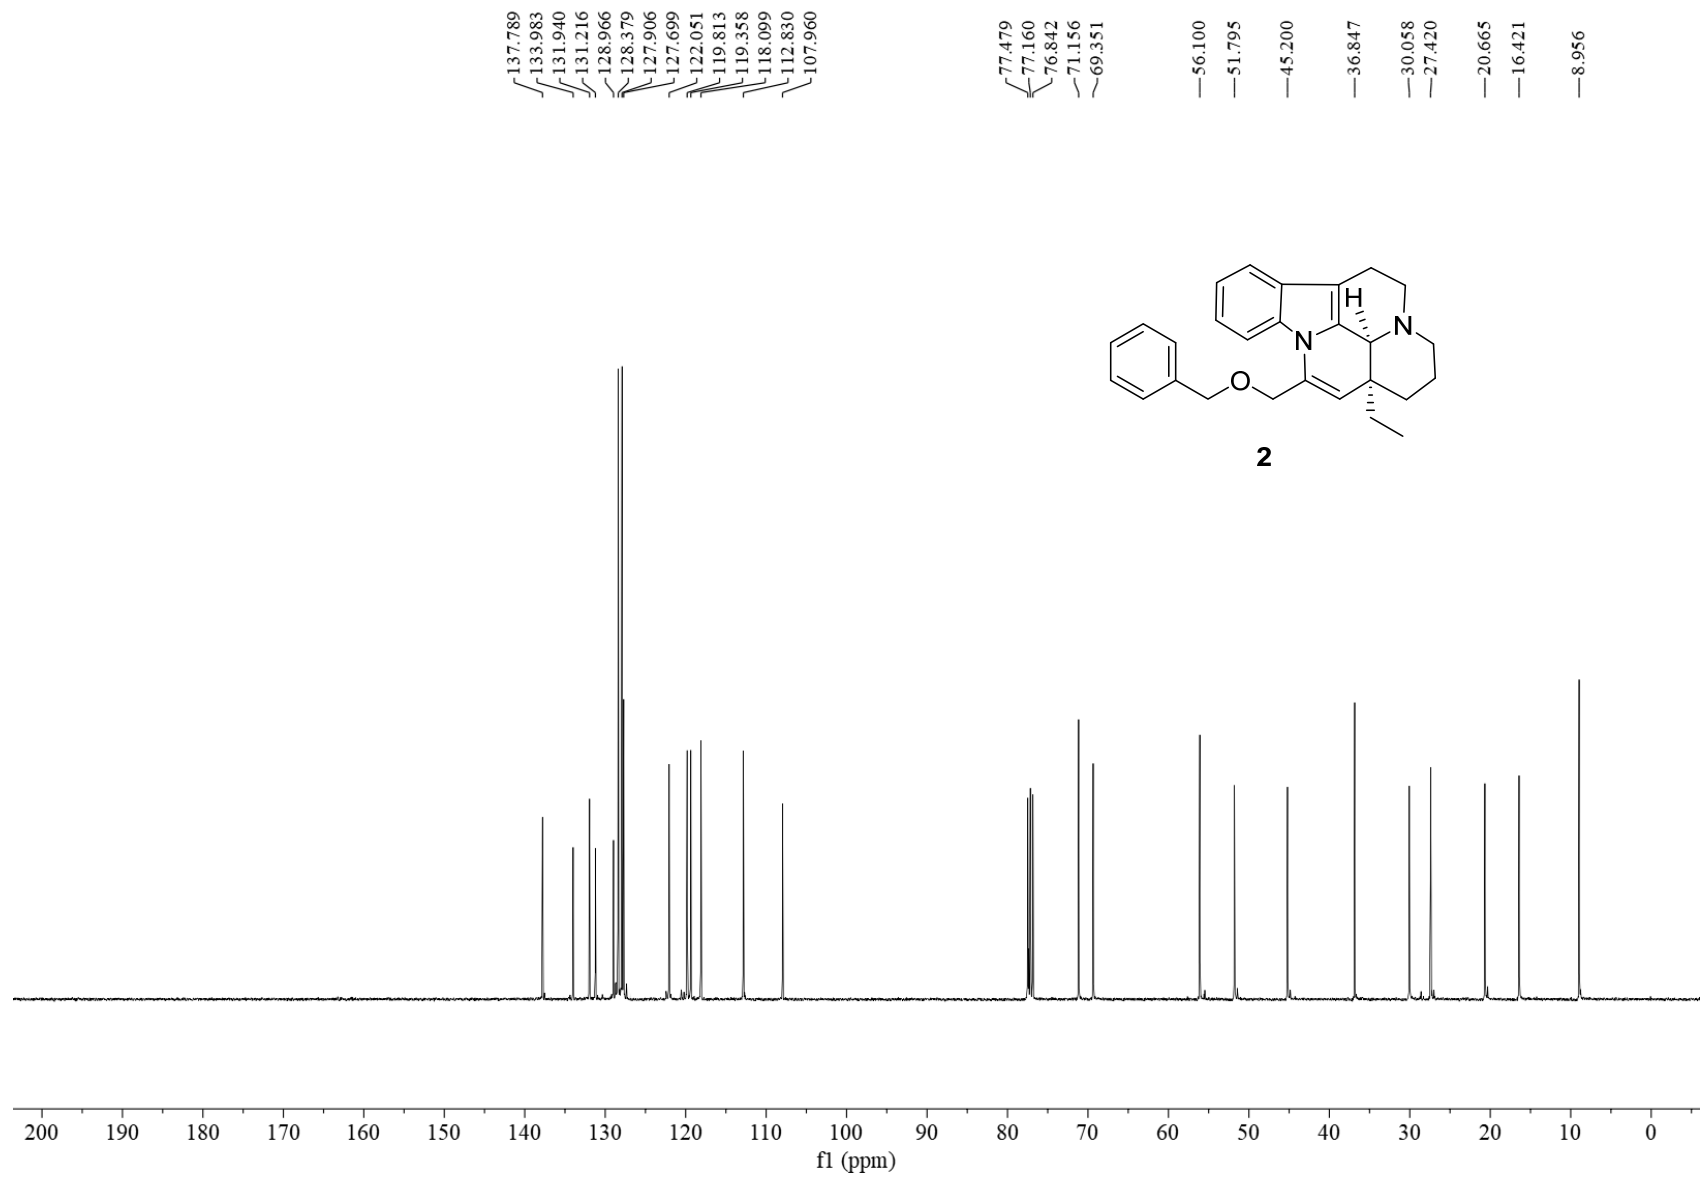

<sup>13</sup>C NMR of Compound **2** (100 MHz, CDCl<sub>3</sub>)

Item name: DB-60-2  
Item description:

Channel name: 1: Average Time 0.0874 min : TOF MS (50-1500) ESI+ : Centroided : Combined

6.86e7

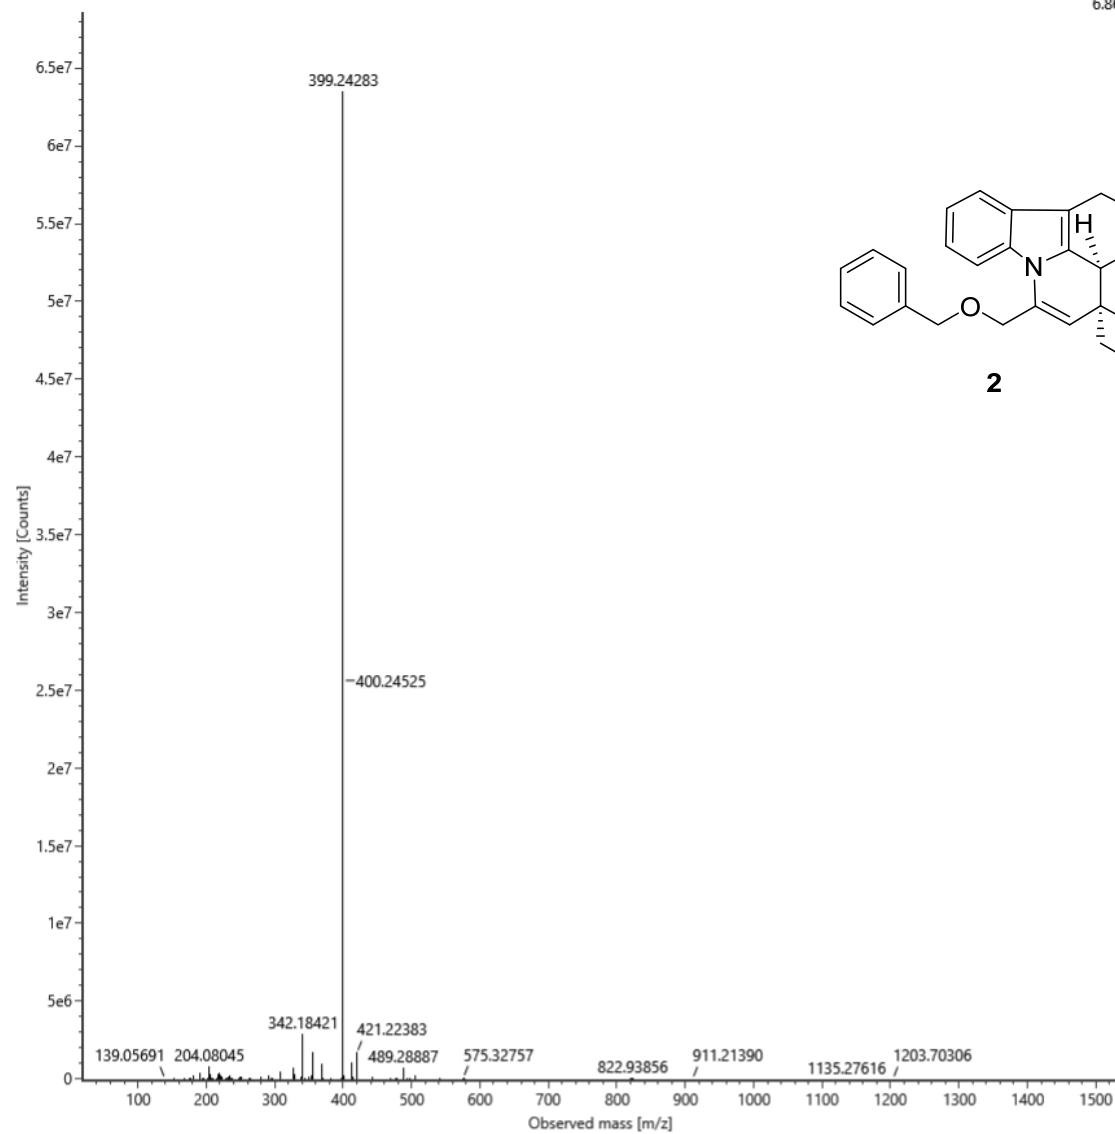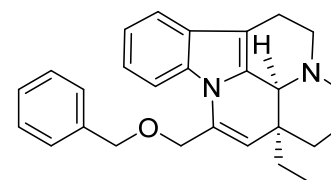

**2**

HRMS of Compound **2**

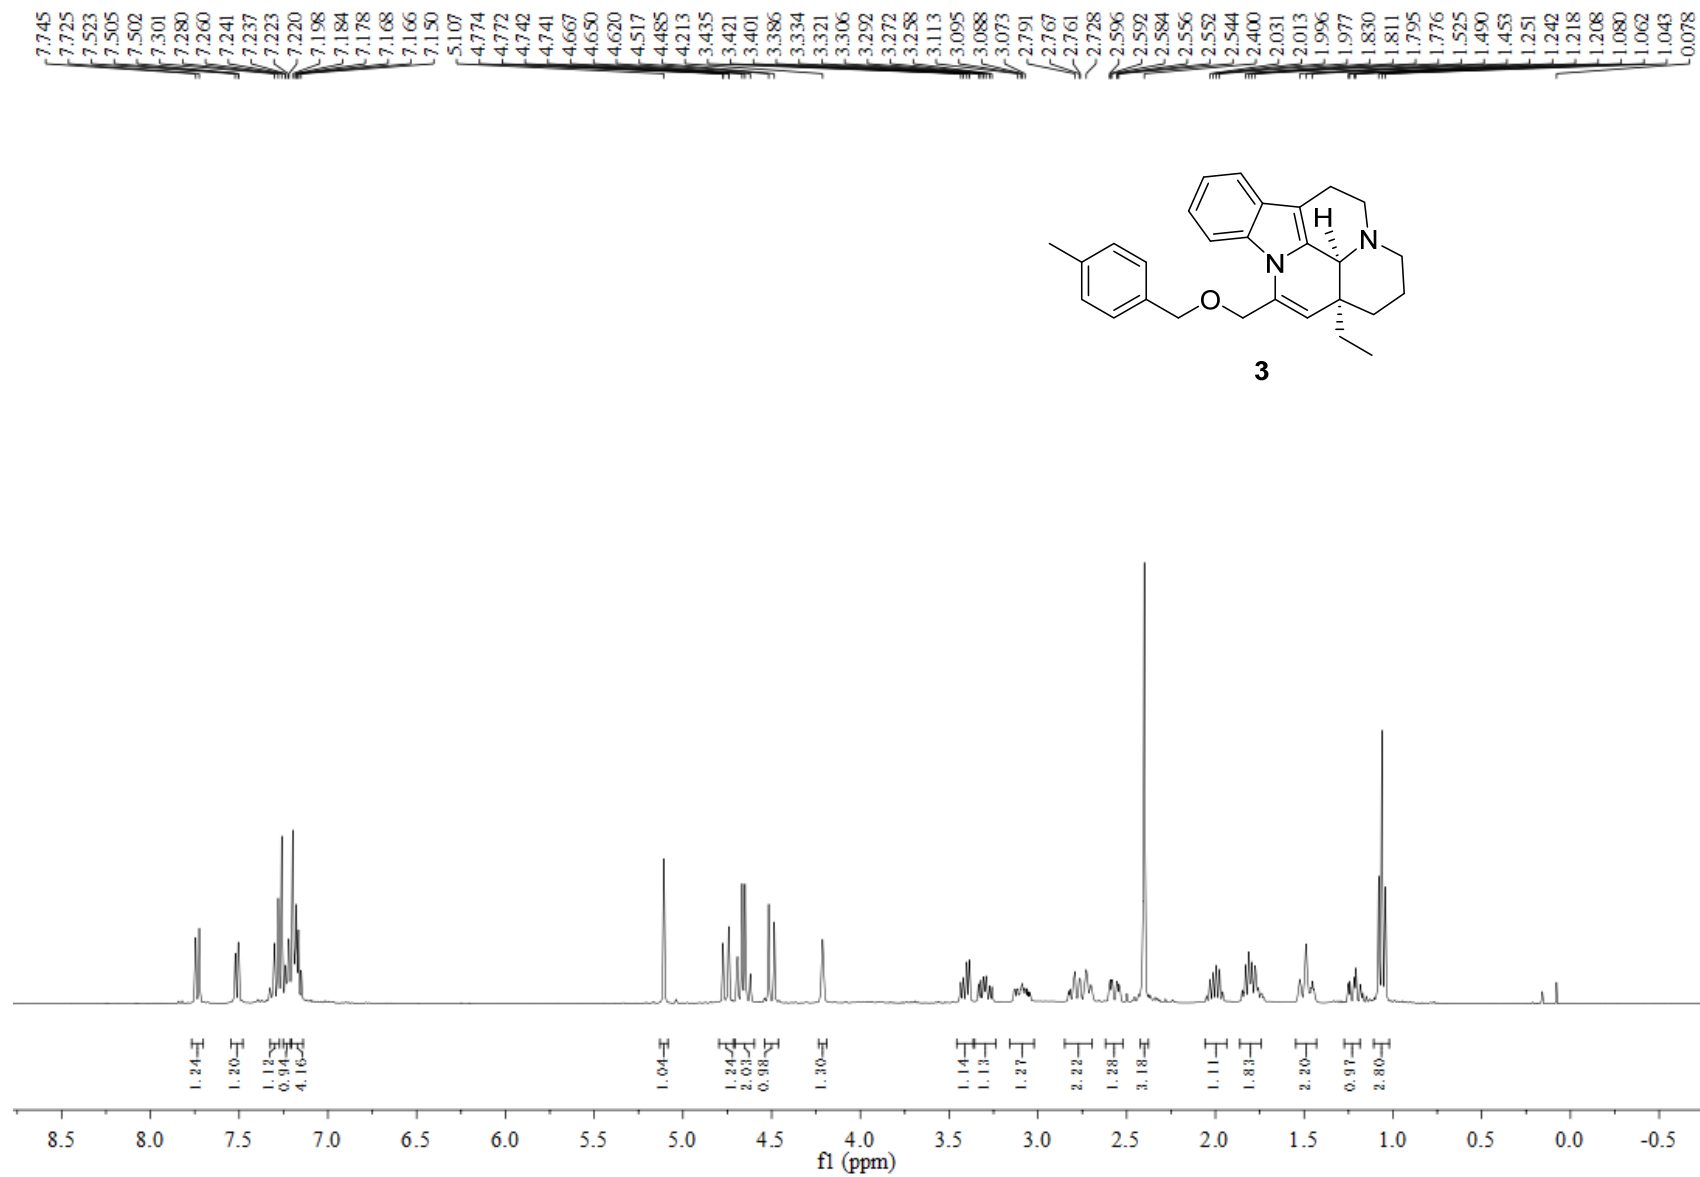

<sup>1</sup>H NMR of Compound **3** (400 MHz, CDCl<sub>3</sub>)

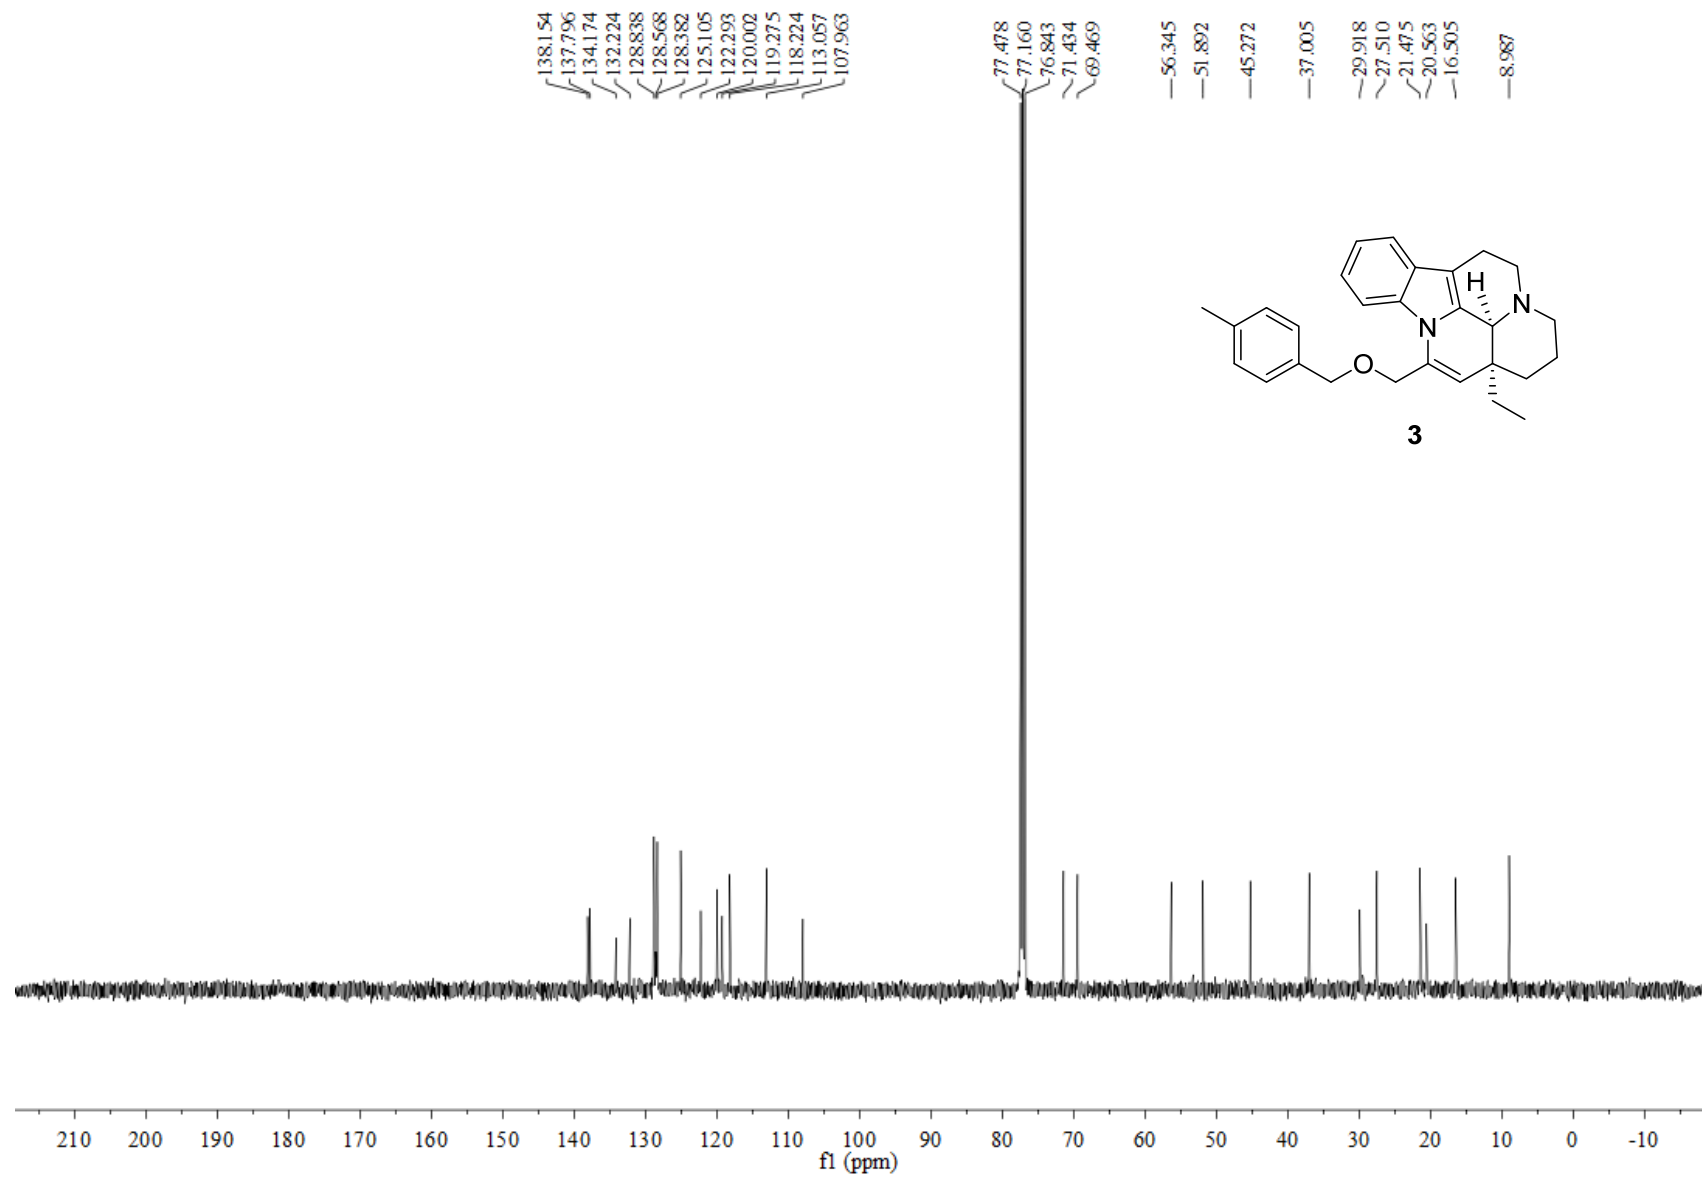

<sup>13</sup>C NMR of Compound **3** (100 MHz, CDCl<sub>3</sub>)

Item name: DB-60-11  
Item description:

Channel name: 1: Average Time 0.1132 min : TOF MS (50-1500) ESI+ : Centroided : Combined

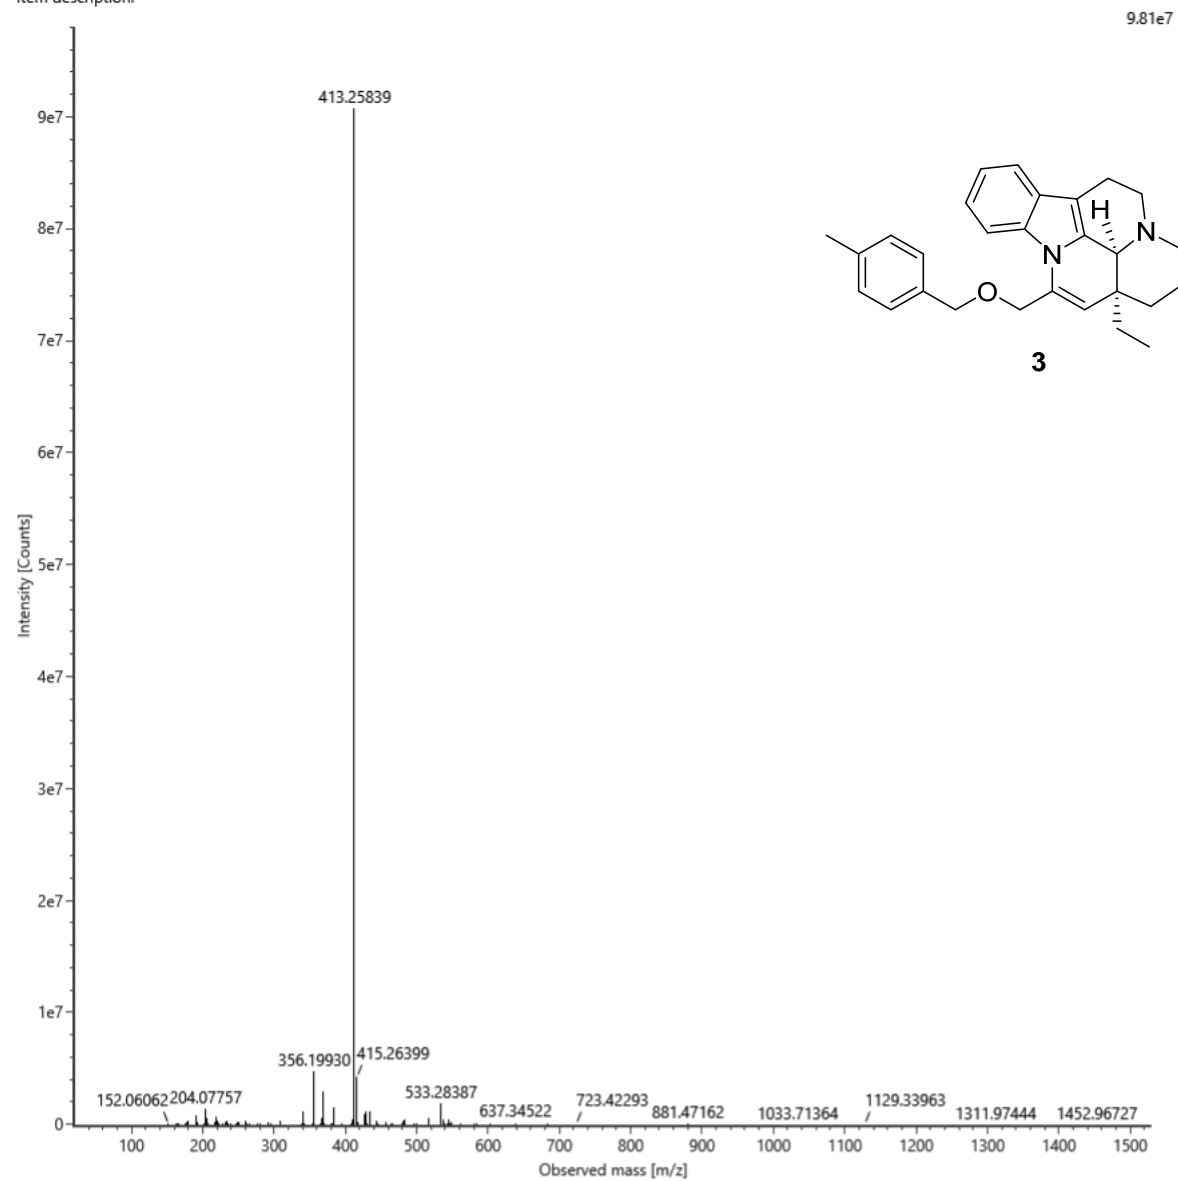

HRMS of Compound **3**

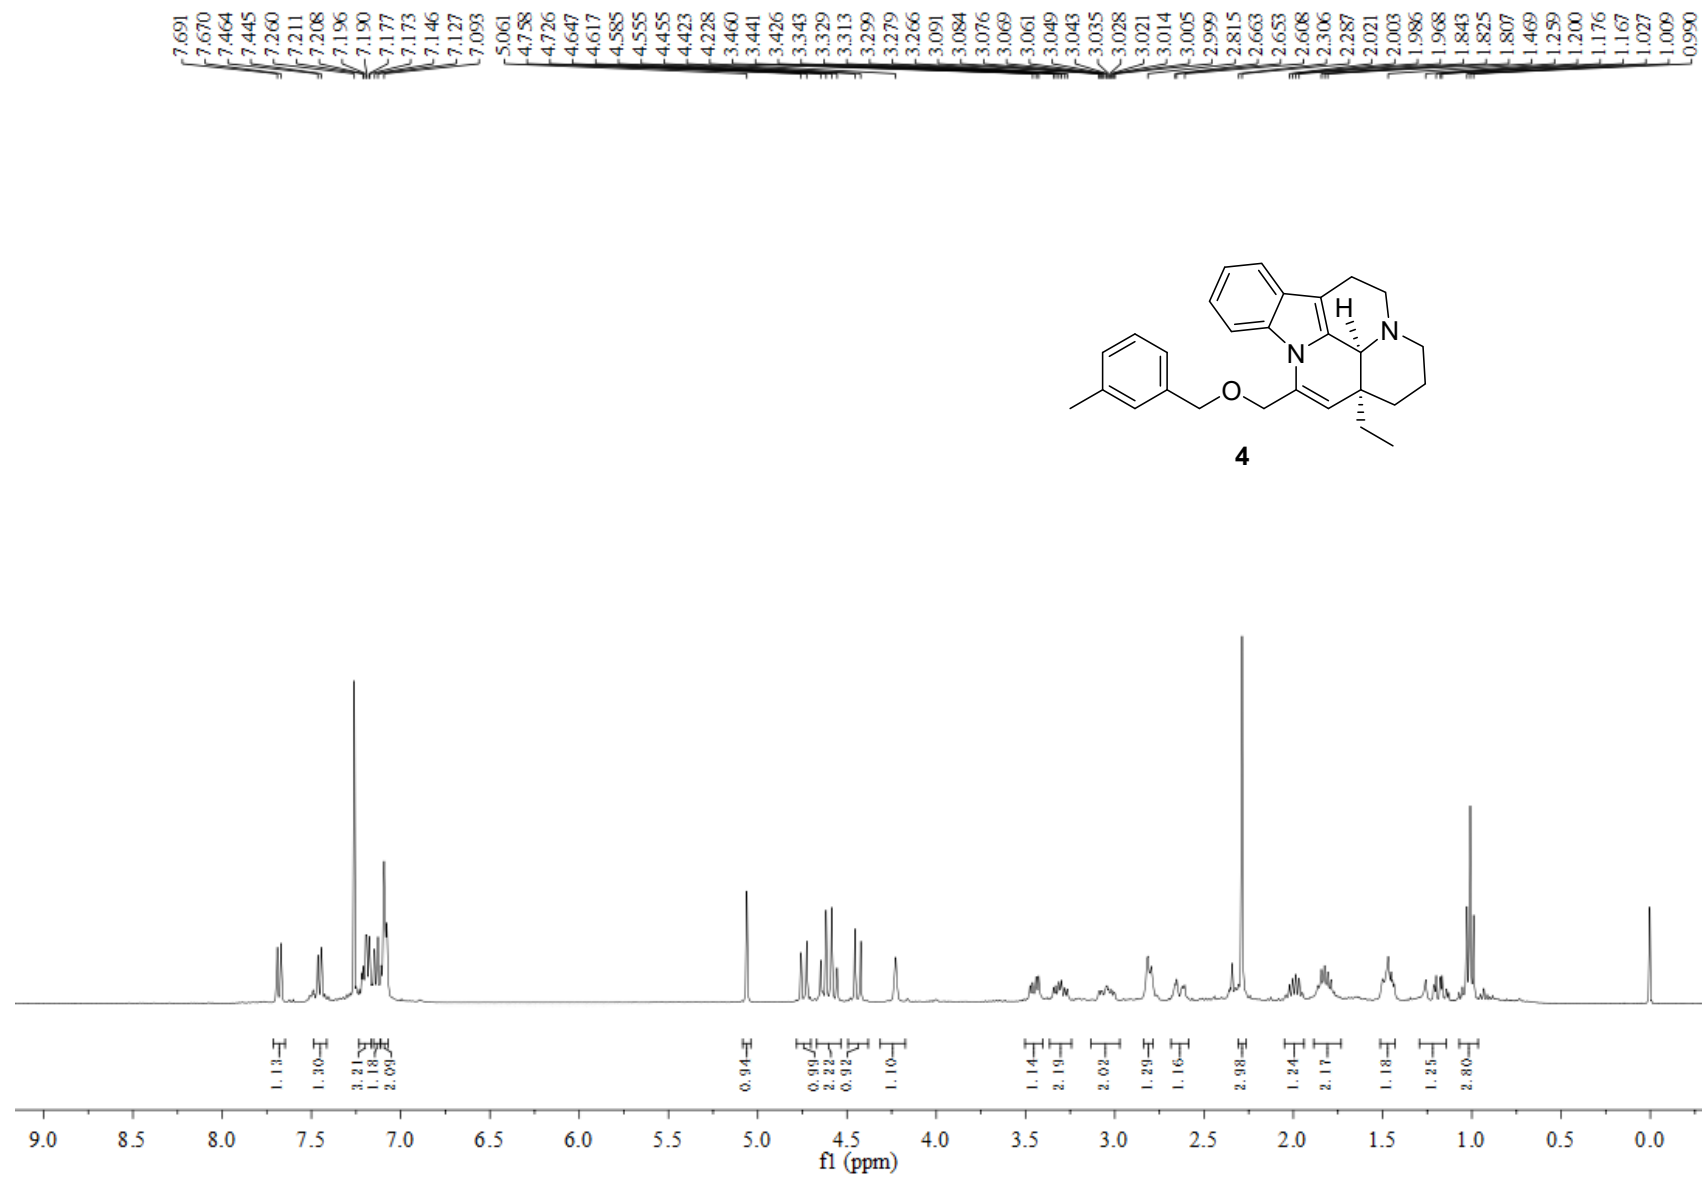

<sup>1</sup>H NMR of Compound 4 (400 MHz, CDCl<sub>3</sub>)



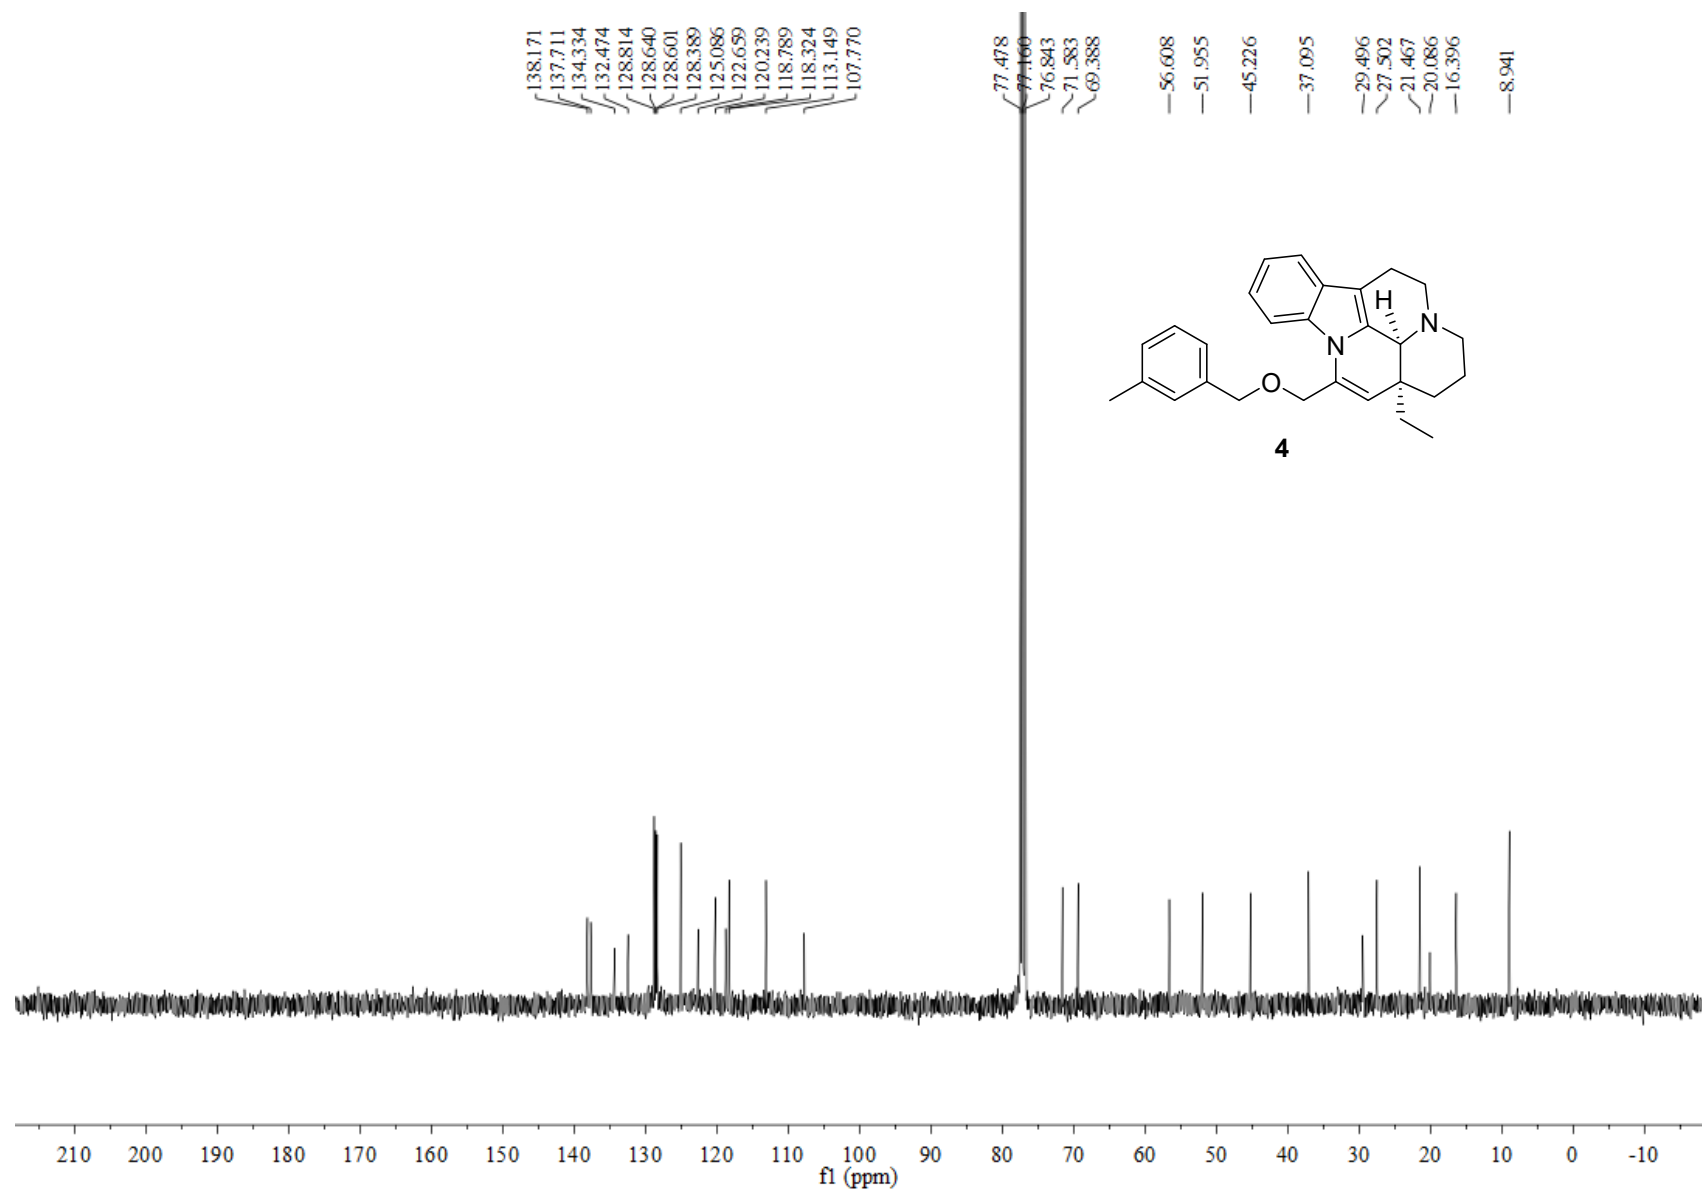

<sup>13</sup>C NMR of Compound **4** (100 MHz, CDCl<sub>3</sub>)

Item name: DB-60-9  
Item description:

Channel name: 1: Average Time 0.1089 min : TOF MS (50-1500) ESI+ : Centroided : Combined

8.04e7

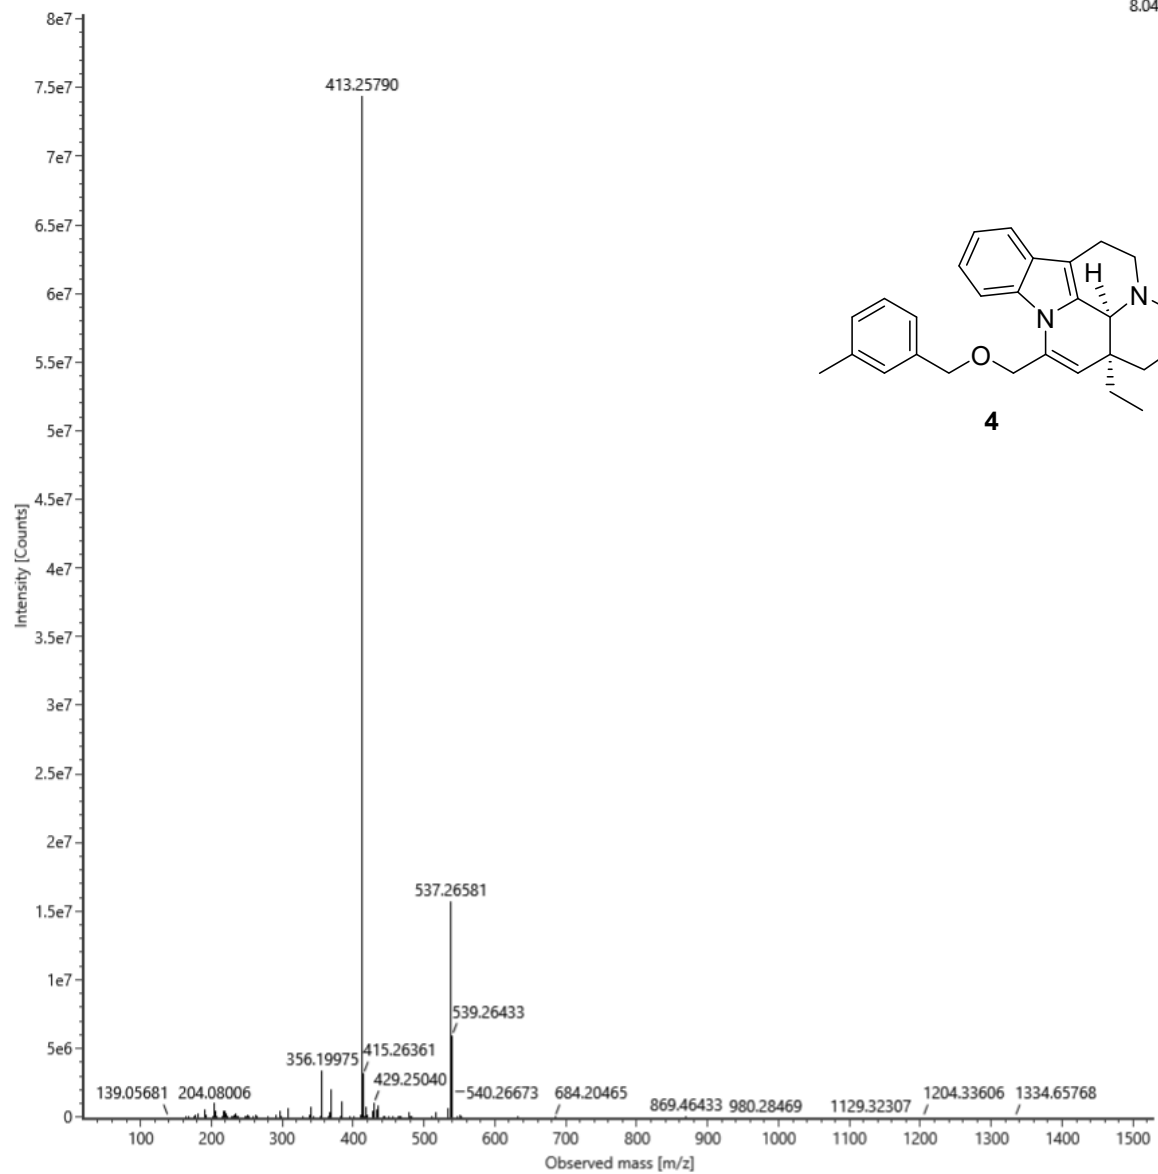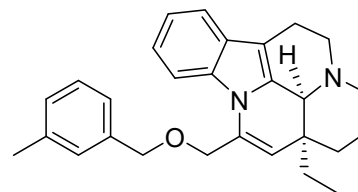

**4**

HRMS of Compound 4

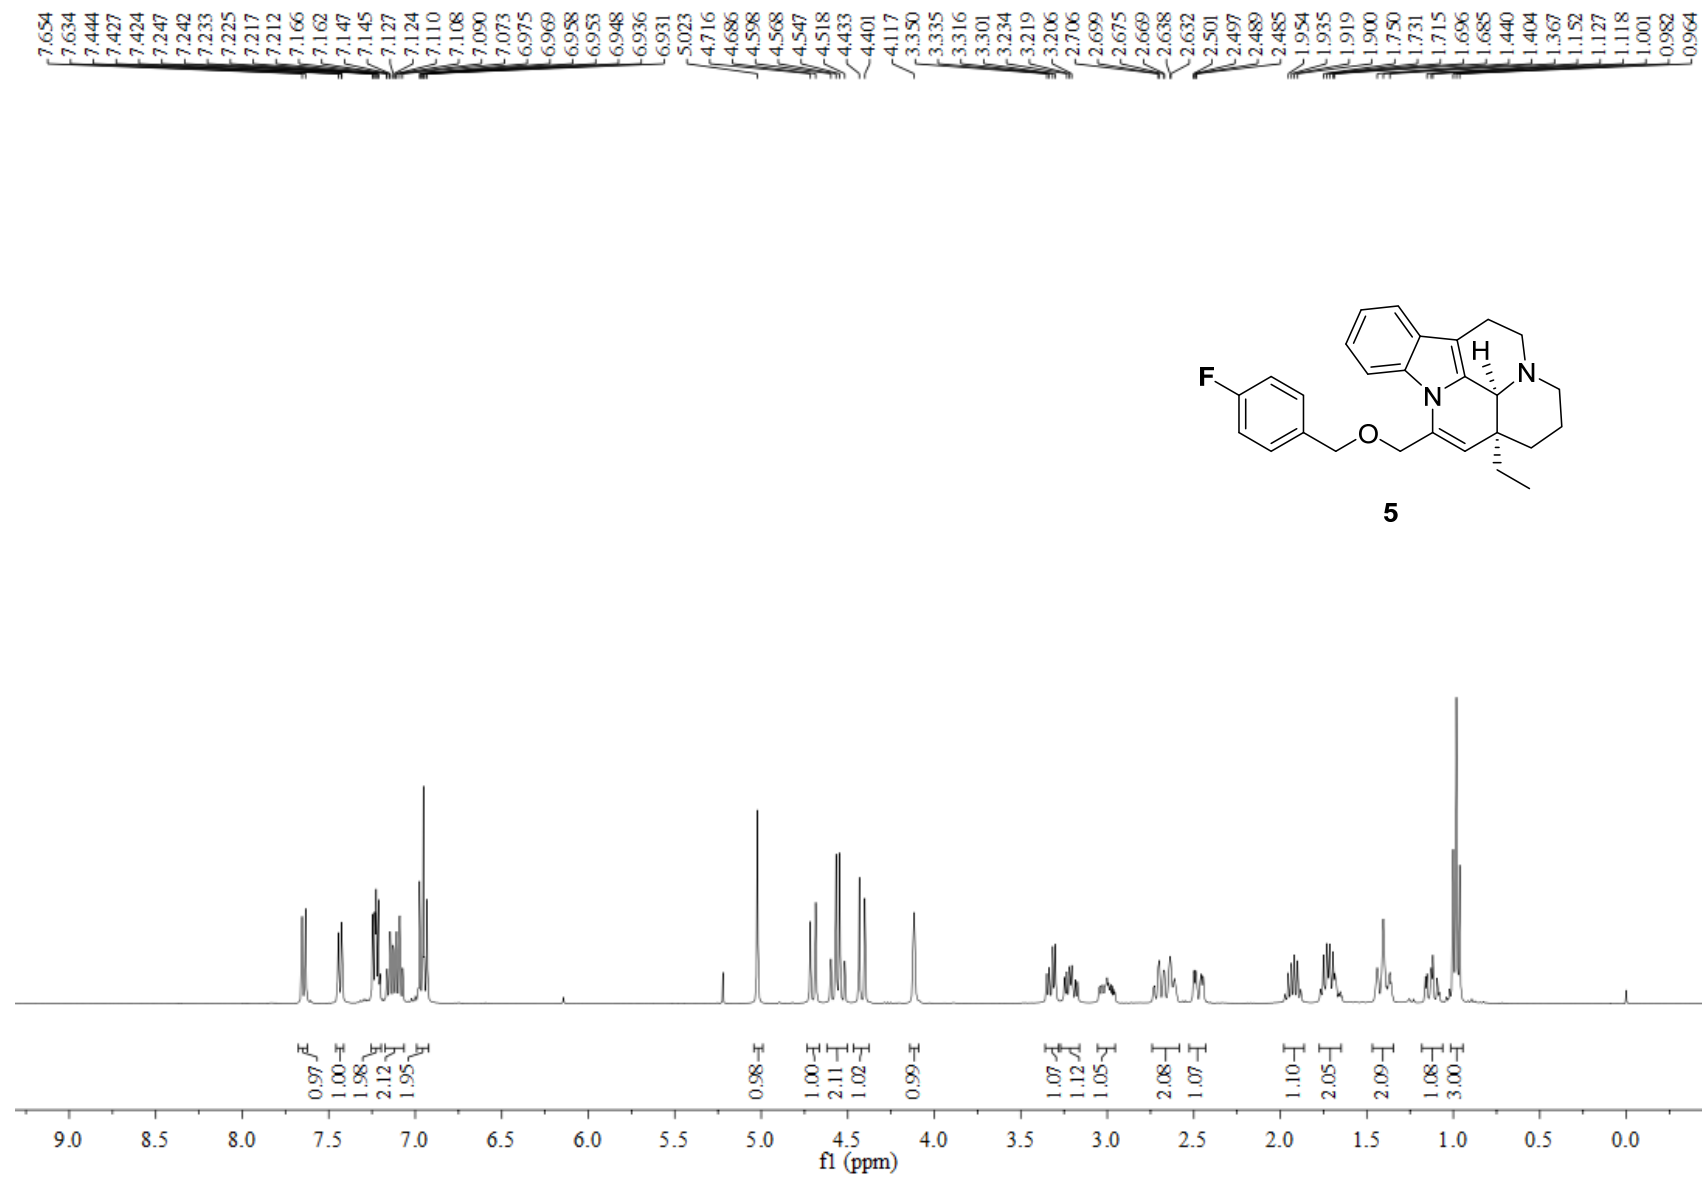

<sup>1</sup>H NMR of Compound **5** (400 MHz, CDCl<sub>3</sub>)

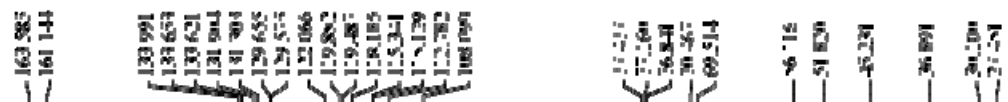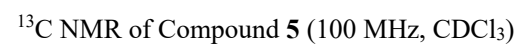

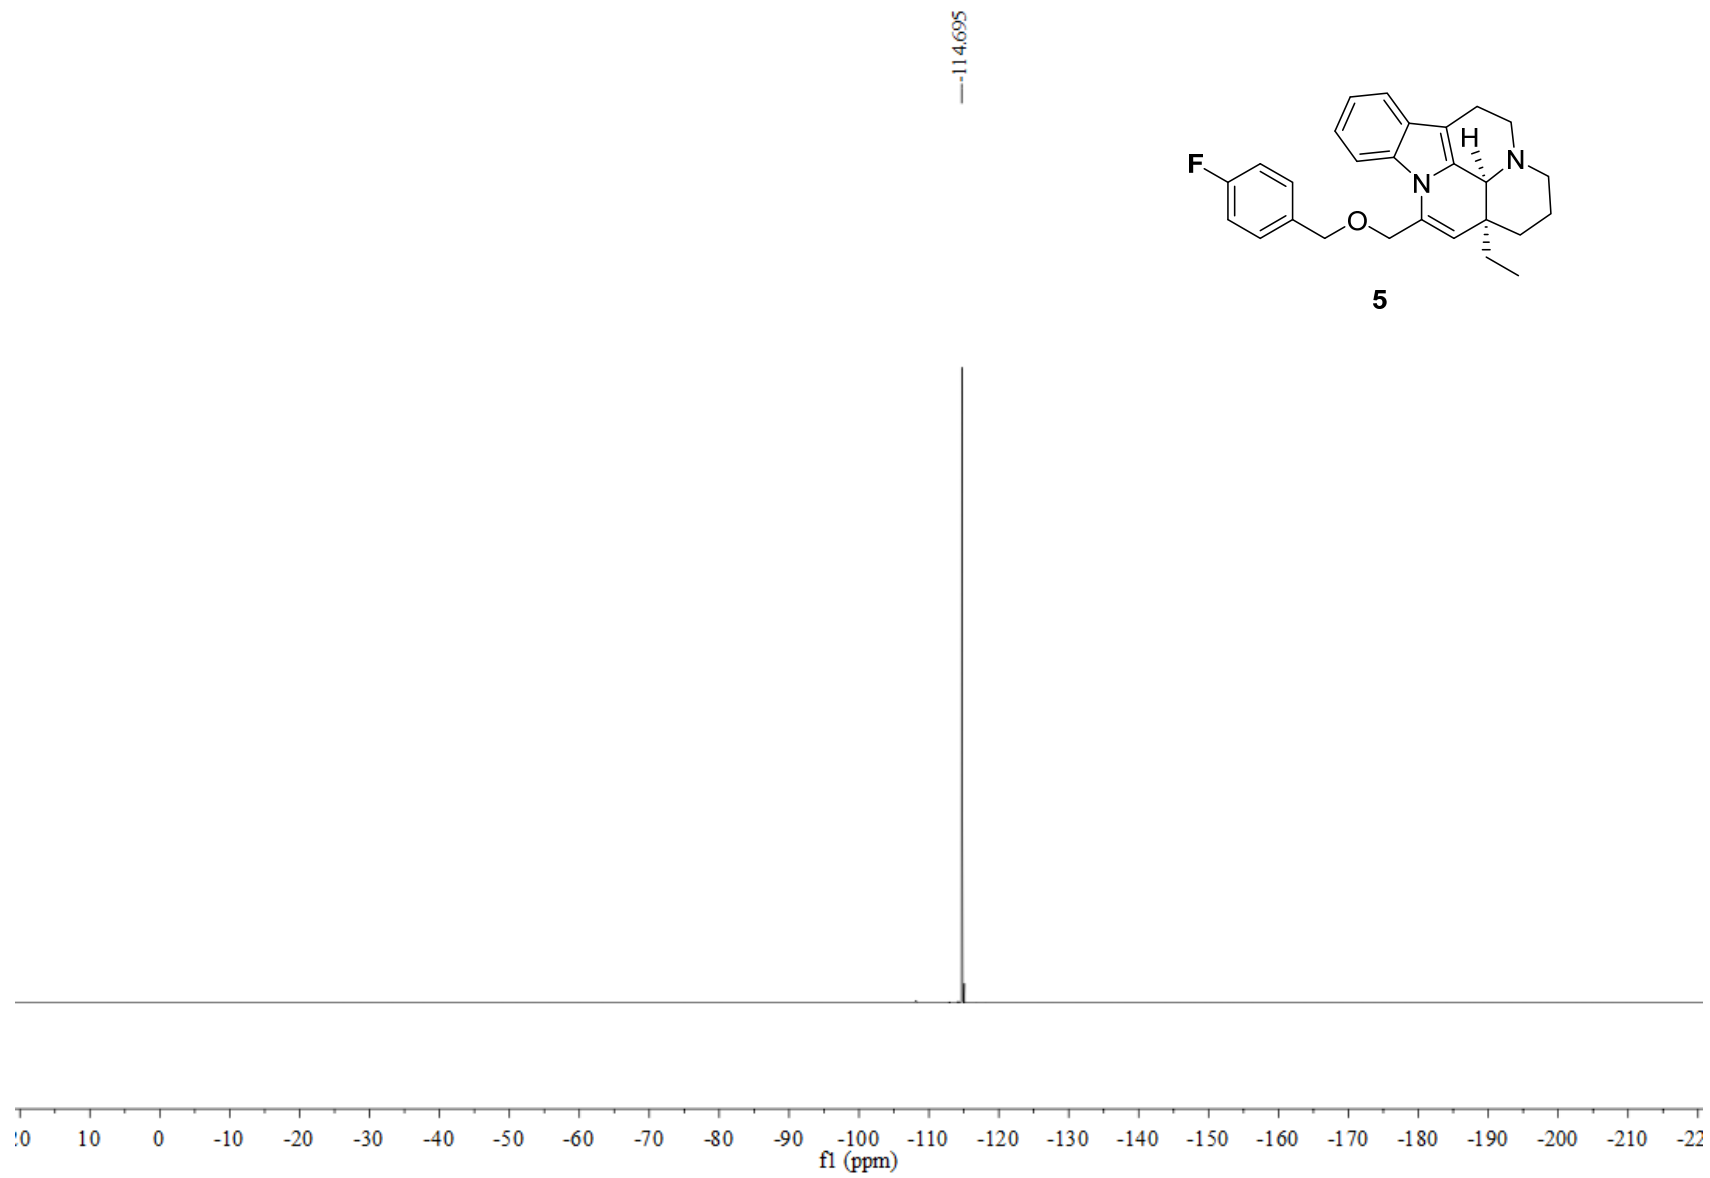

$^{19}\text{F}$  NMR of Compound **5** (377 MHz,  $\text{CDCl}_3$ )

Item name: DB-60-28  
Item description:

Channel name: 1: Average Time 0.0788 min : TOF MS (50-1500) ESI+ : Centroided : Combined

3.83e7

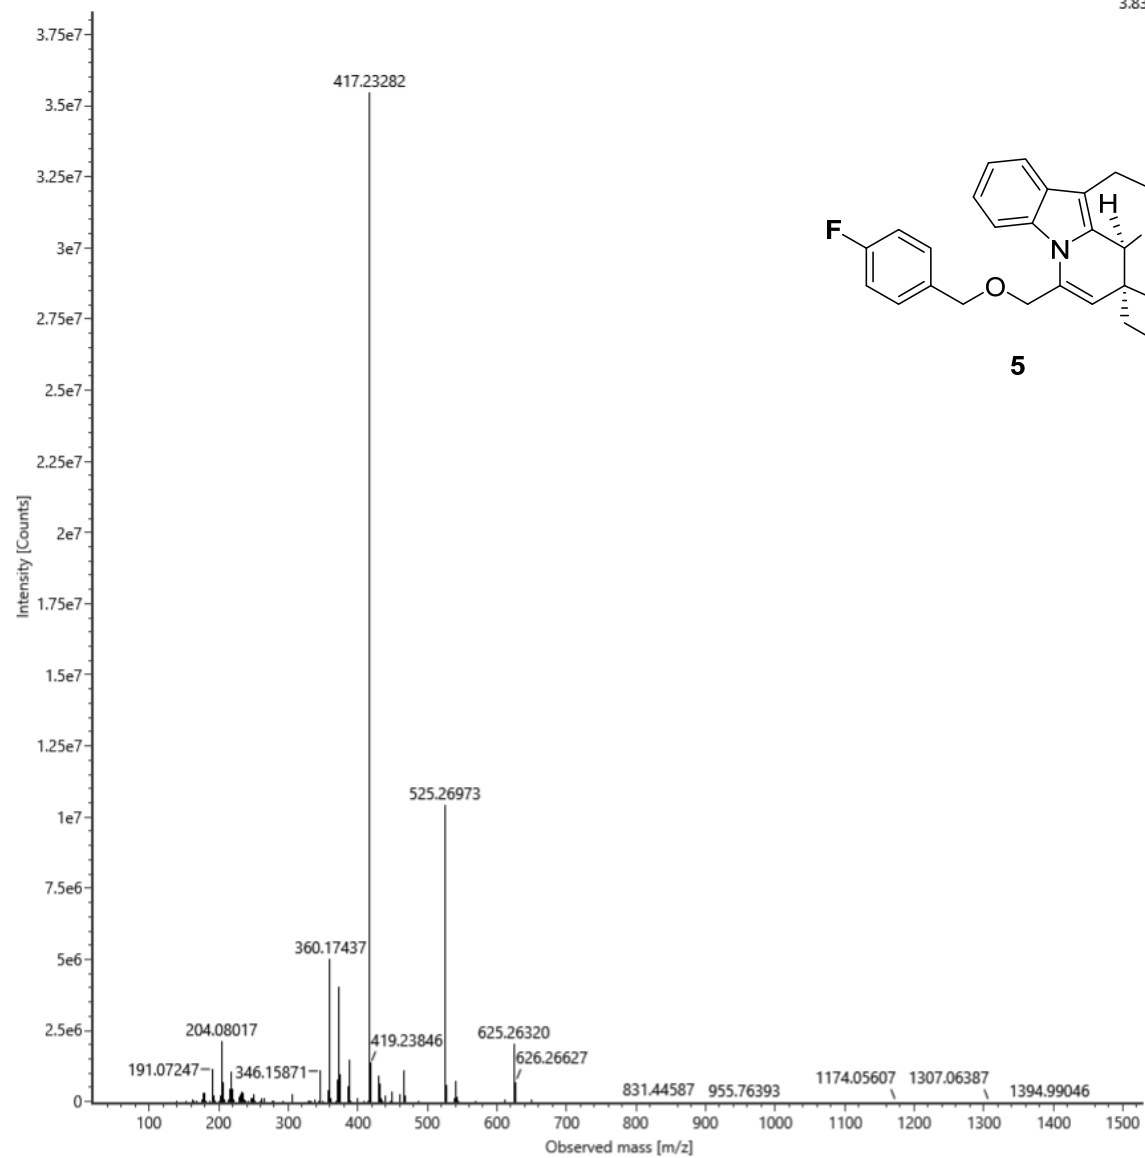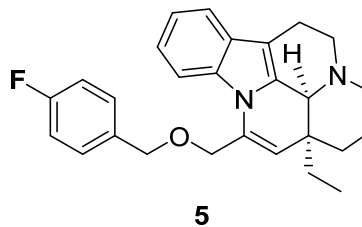

HRMS of Compound 5

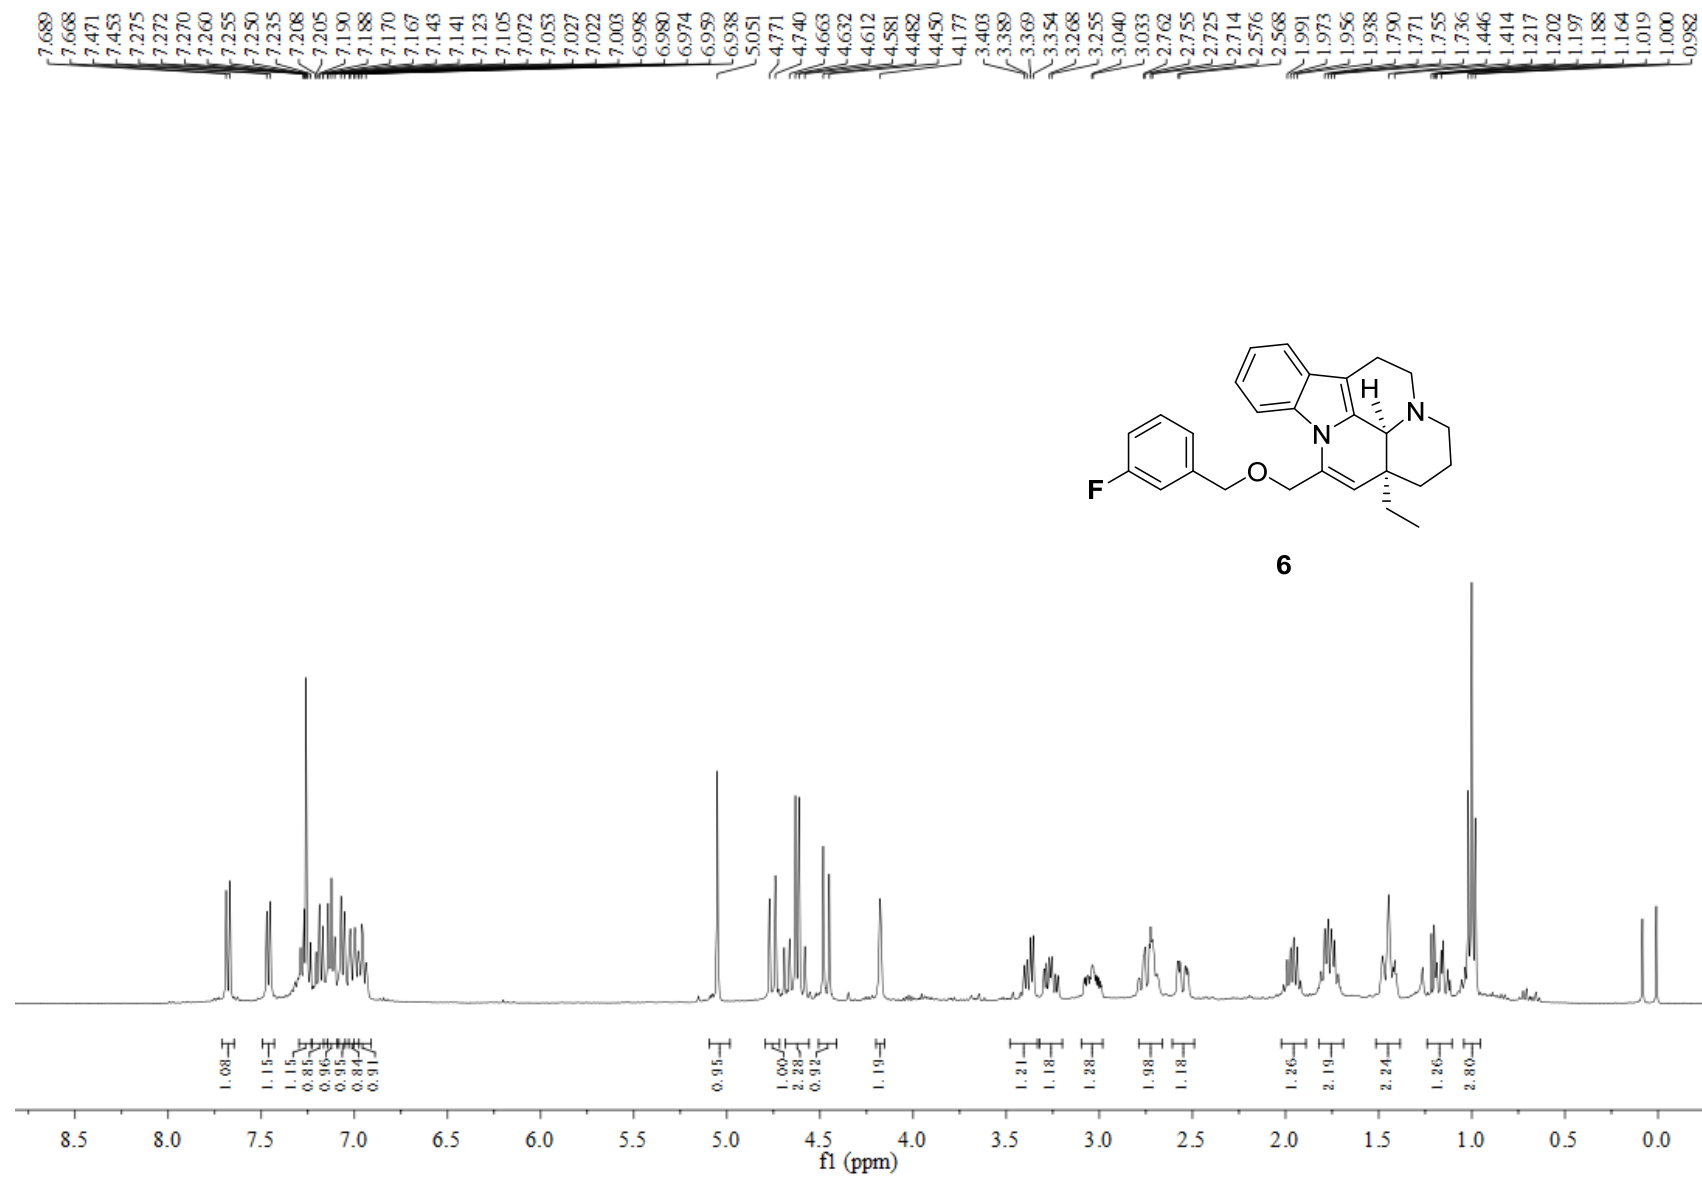

<sup>1</sup>H NMR of Compound 6 (400 MHz, CDCl<sub>3</sub>)

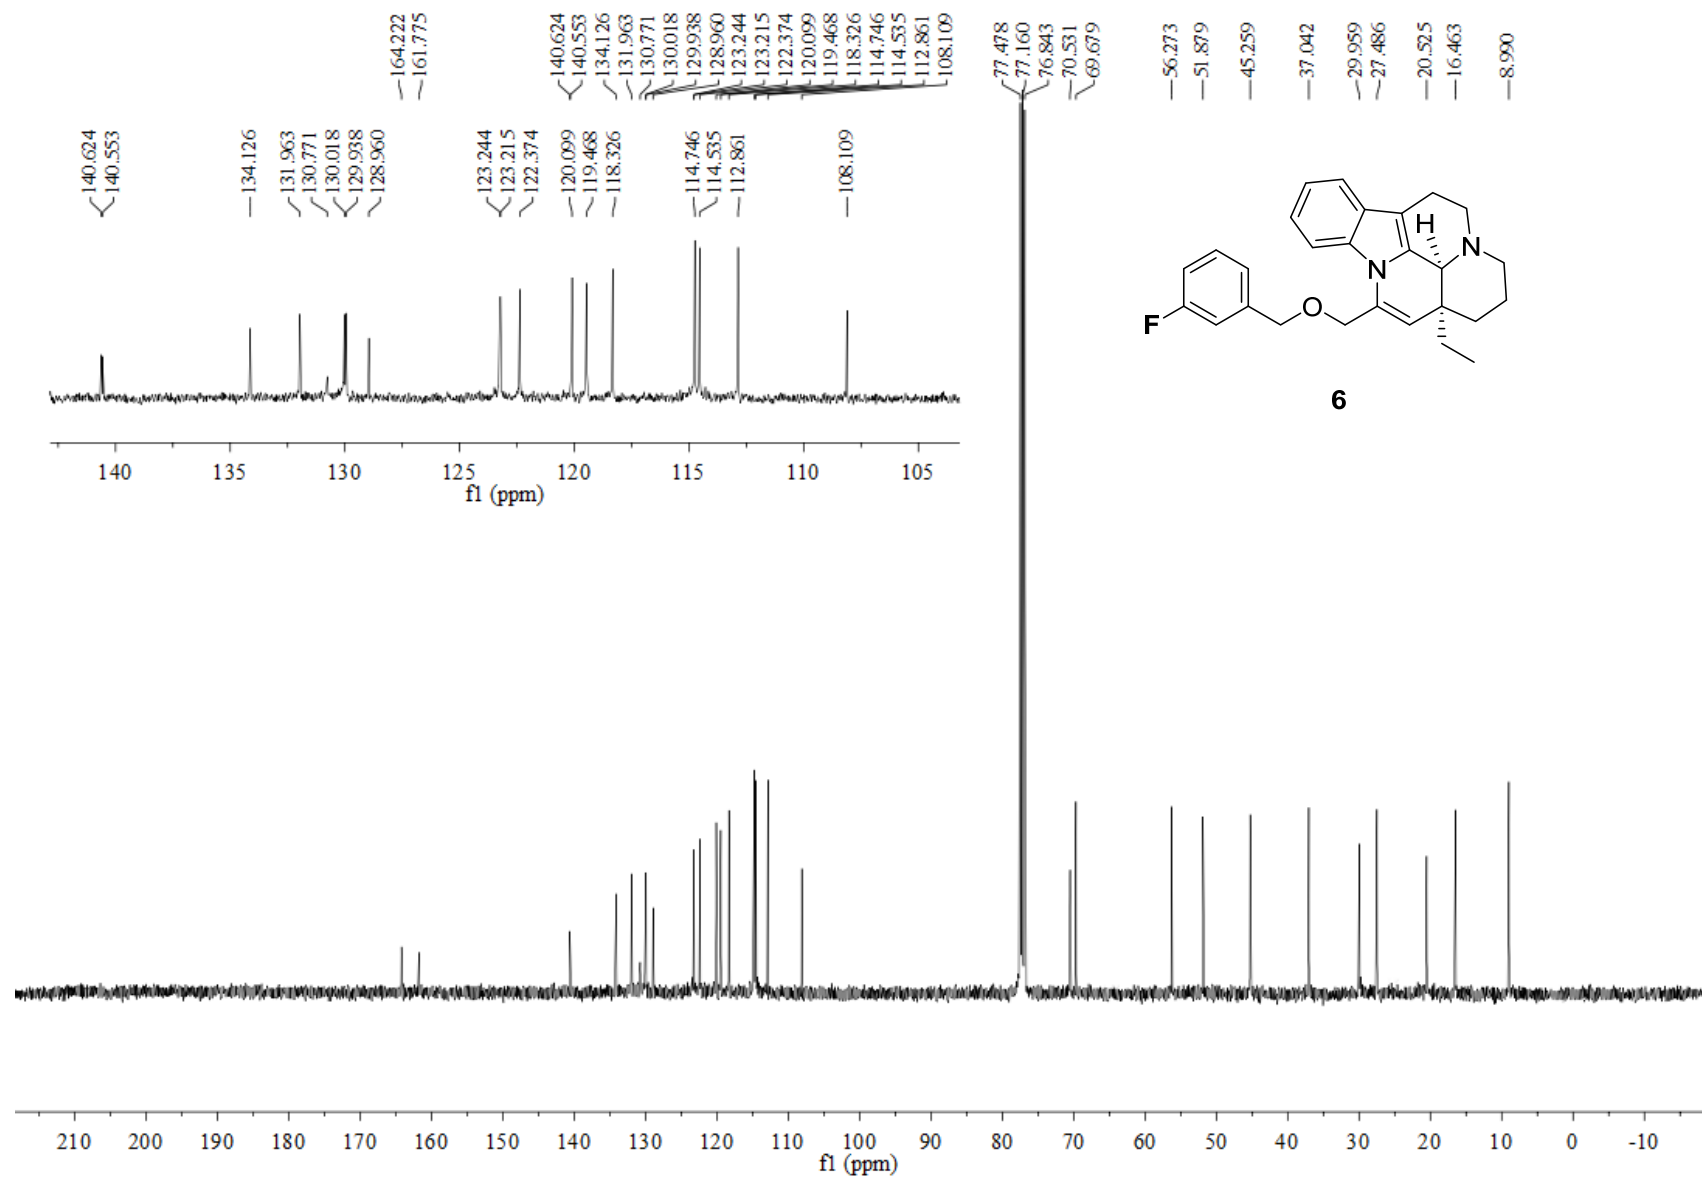

<sup>13</sup>C NMR of Compound **6** (100 MHz, CDCl<sub>3</sub>)



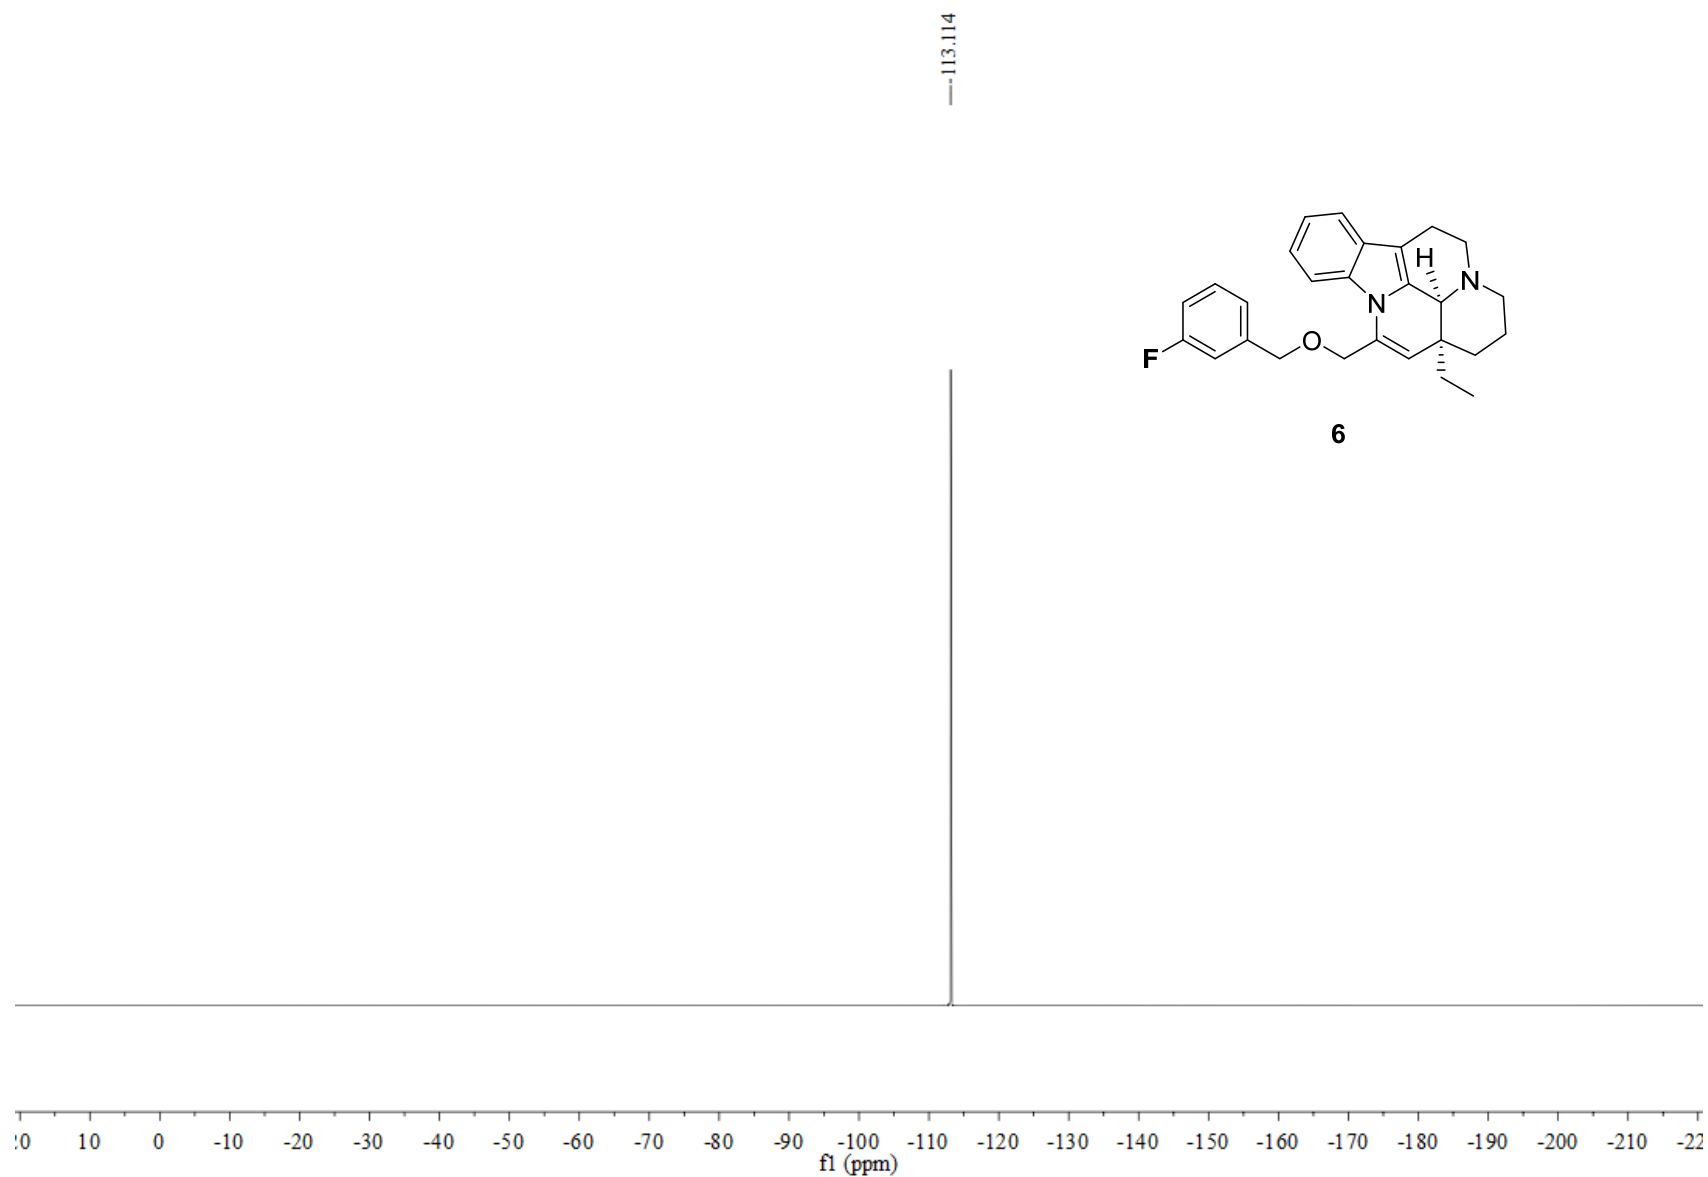

$^{19}\text{F}$  NMR of Compound **6** (377 MHz,  $\text{CDCl}_3$ )

Item name: DB-60-6  
Item description:

Channel name: 1: Average Time 0.0831 min : TOF MS (50-1500) ESI+ : Centroided : Combined

6.13e7

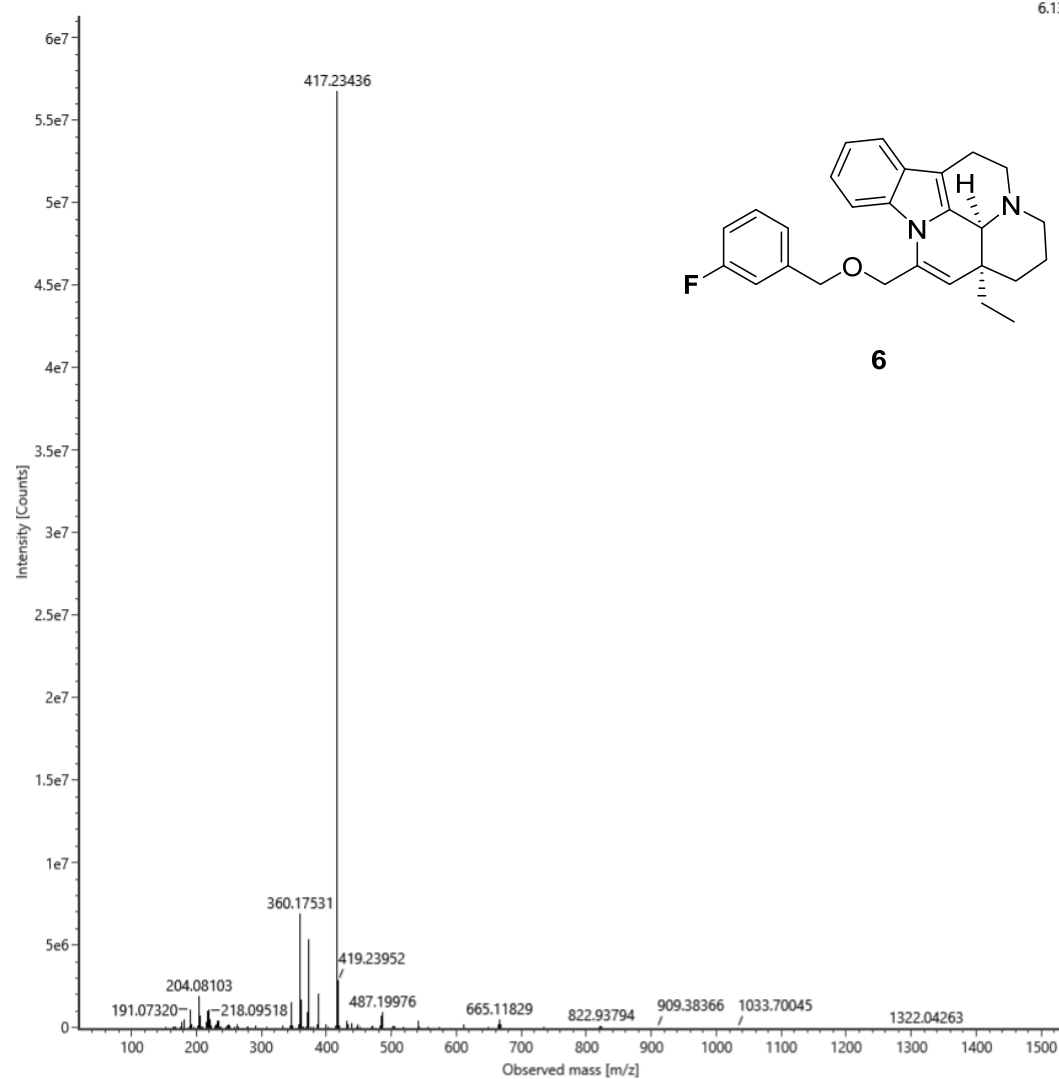

HRMS of Compound 6

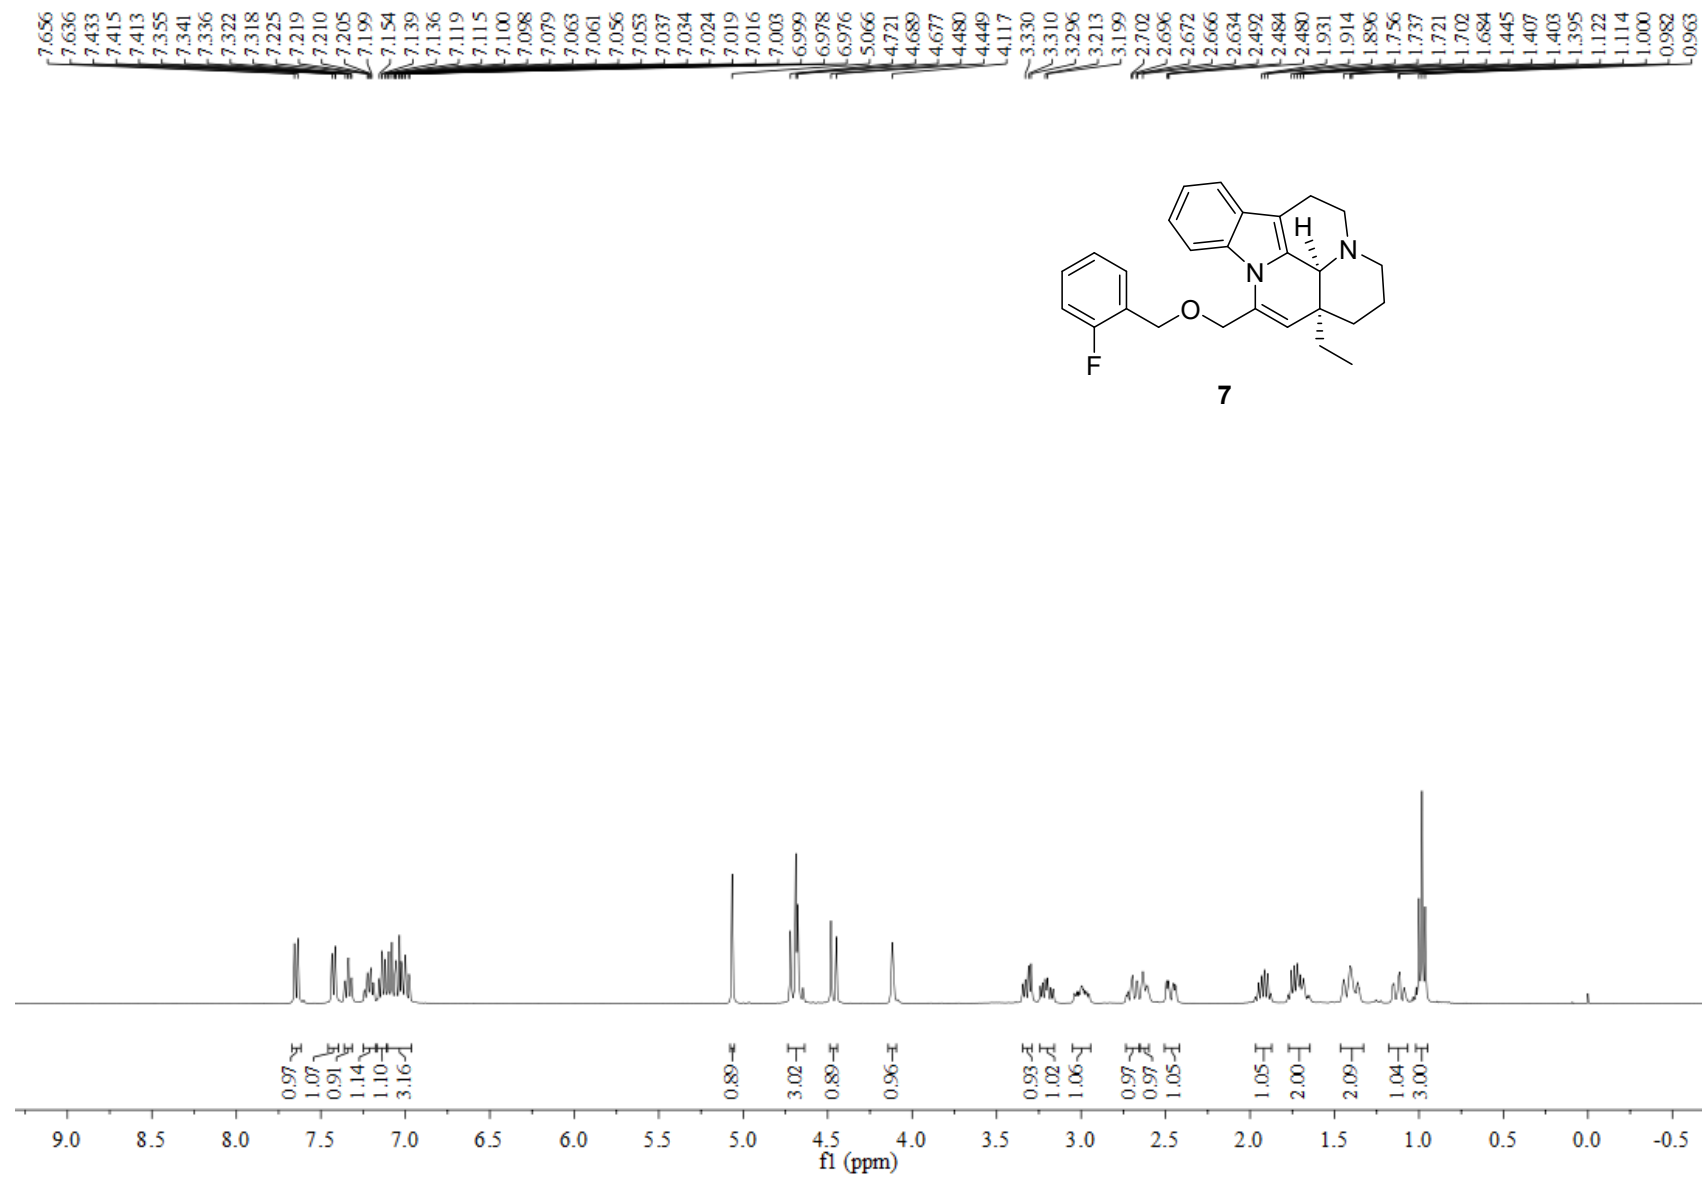

<sup>1</sup>H NMR of Compound 7 (400 MHz, CDCl<sub>3</sub>)

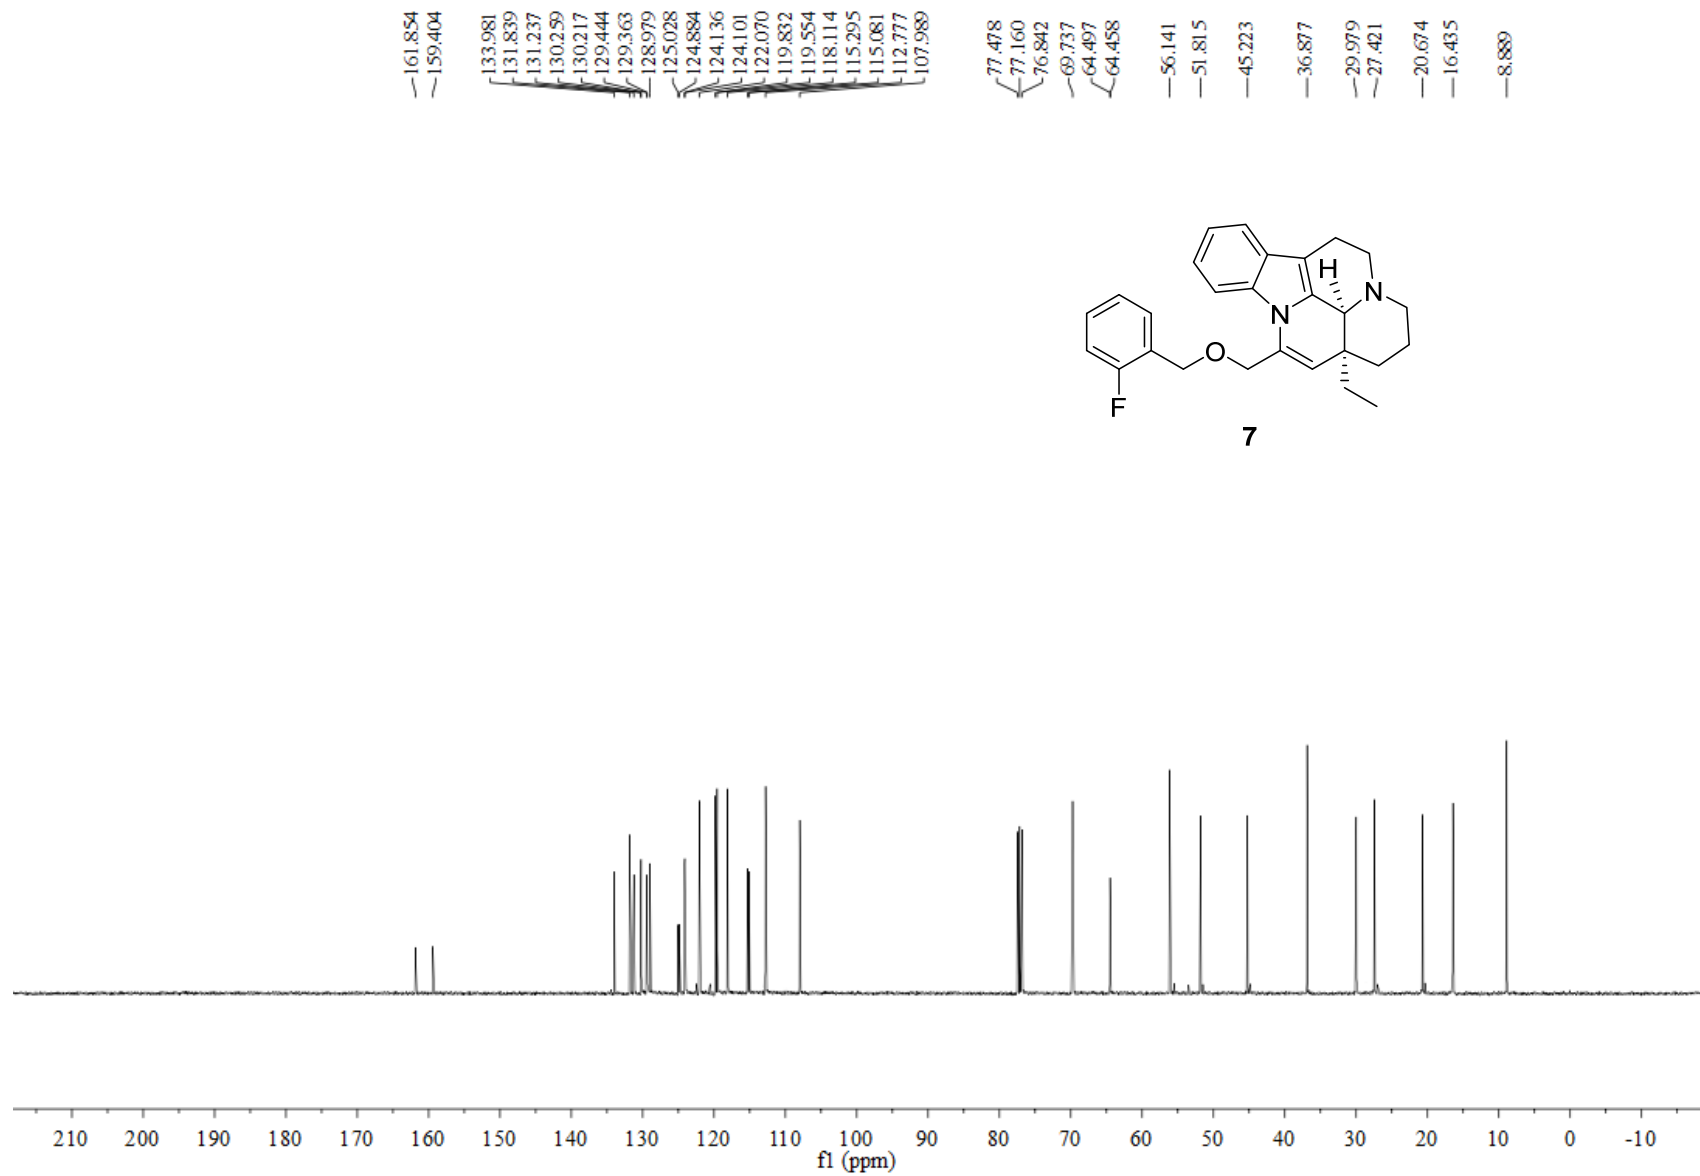

<sup>13</sup>C NMR of Compound 7 (100 MHz, CDCl<sub>3</sub>)

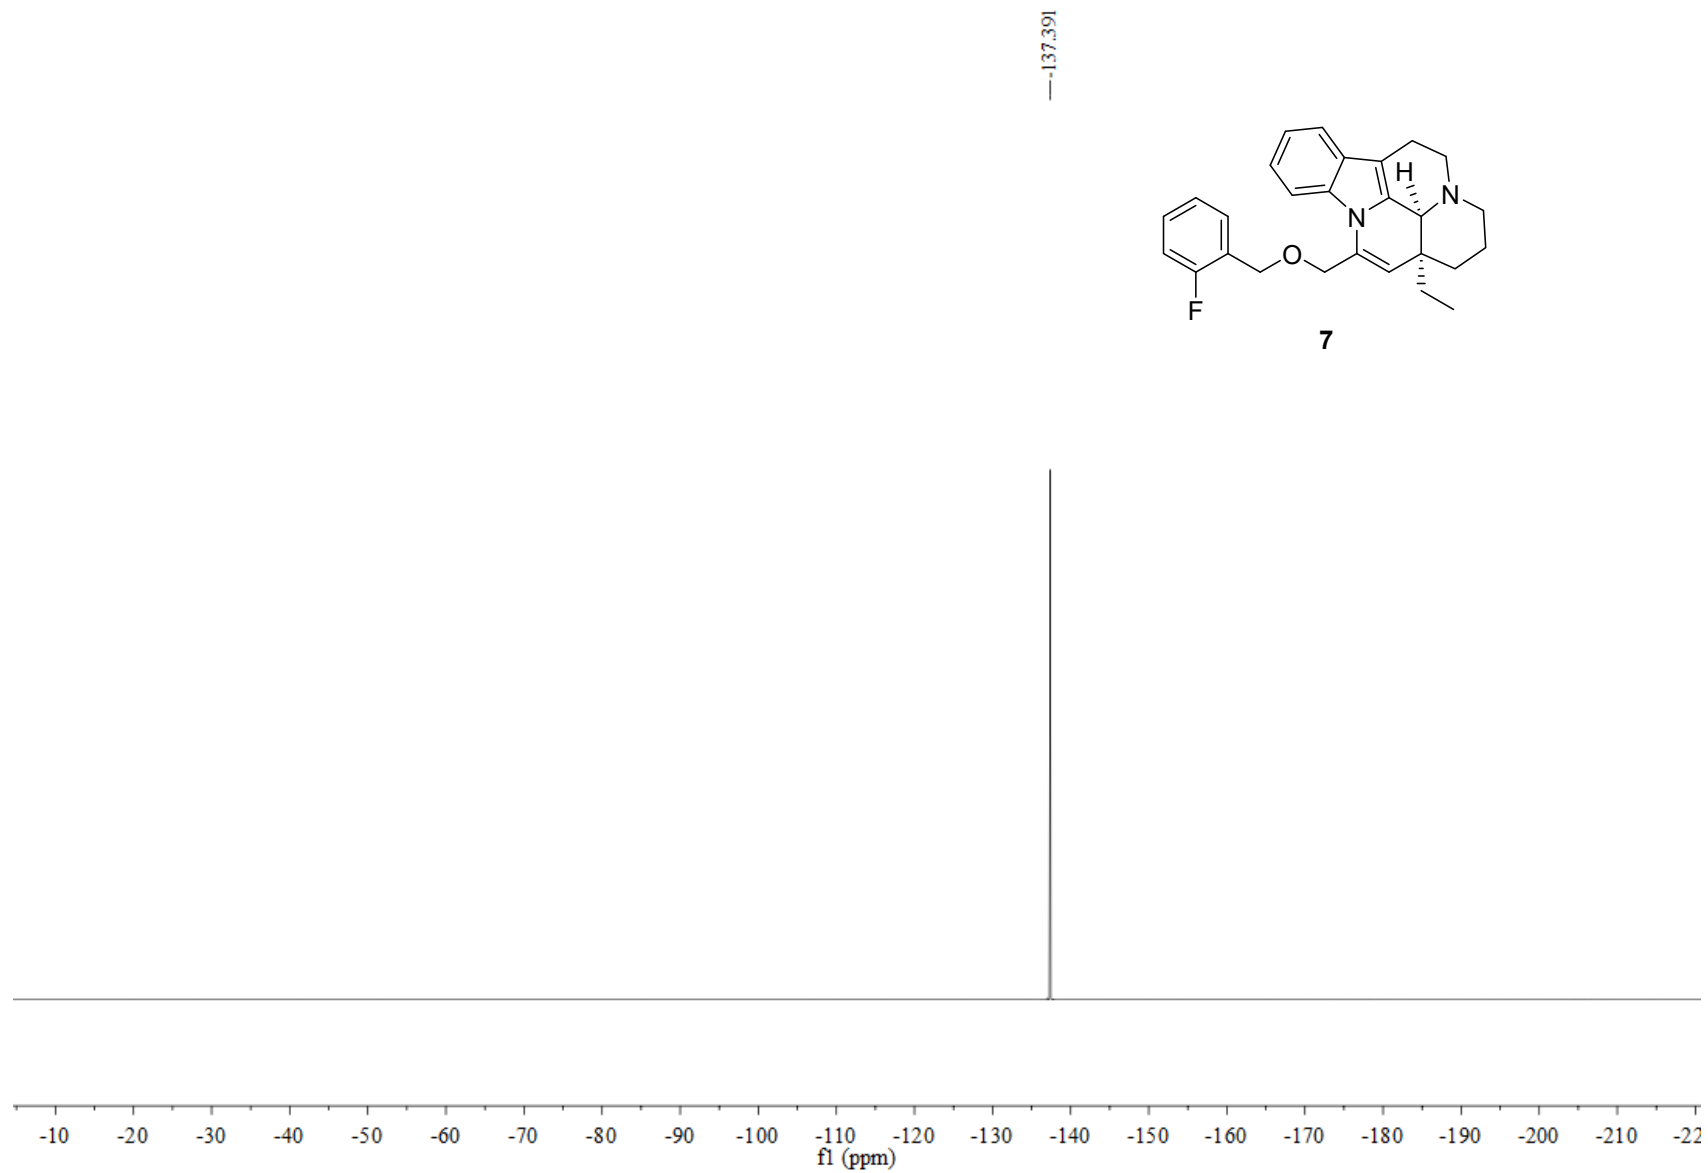

$^{19}\text{F}$  NMR of Compound 7 (377 MHz,  $\text{CDCl}_3$ )

Item name: DB-60-25  
Item description:

Channel name: 1: Average Time 0.0831 min : TOF MS (50-1500) ESI+ : Centroided : Combined

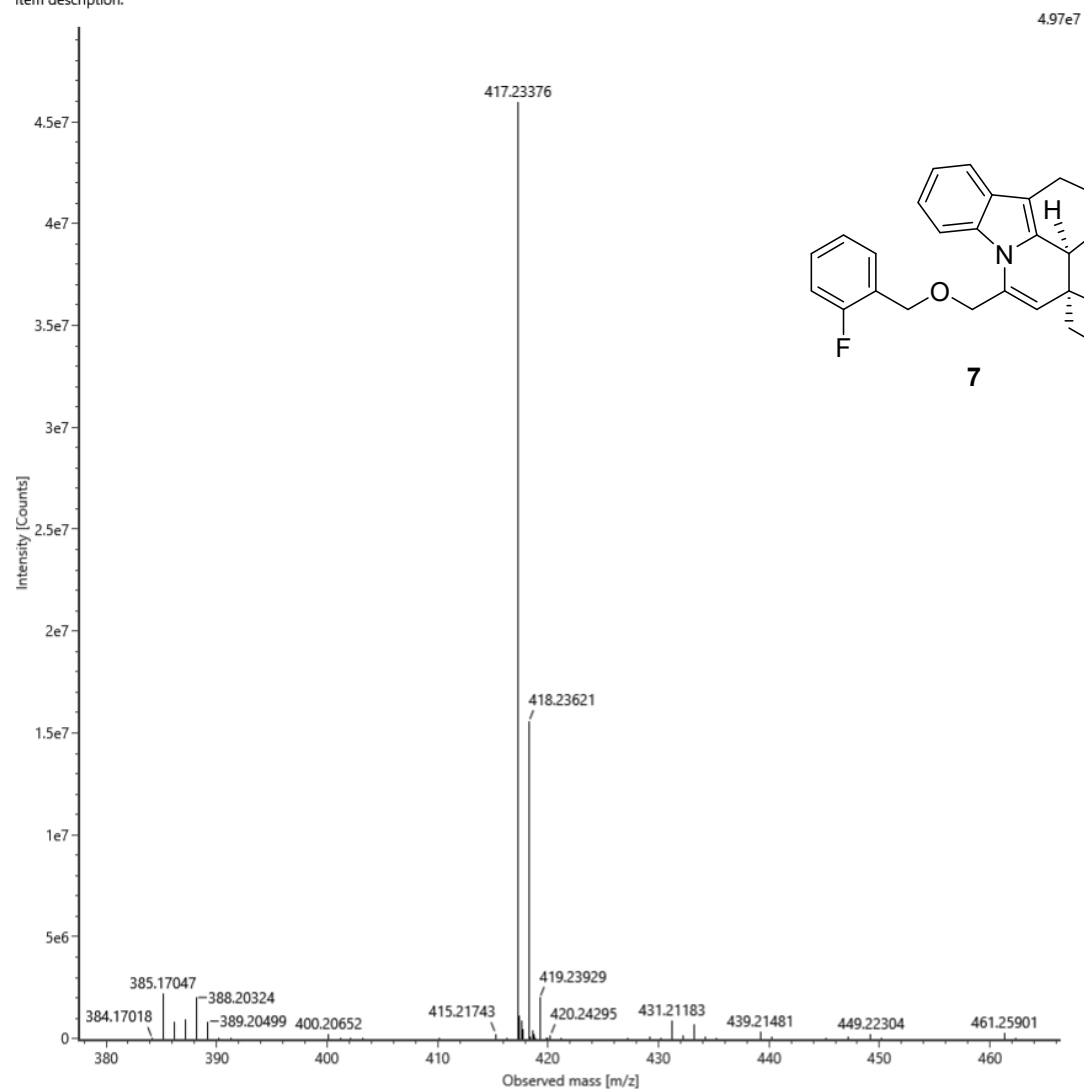

HRMS of Compound 7

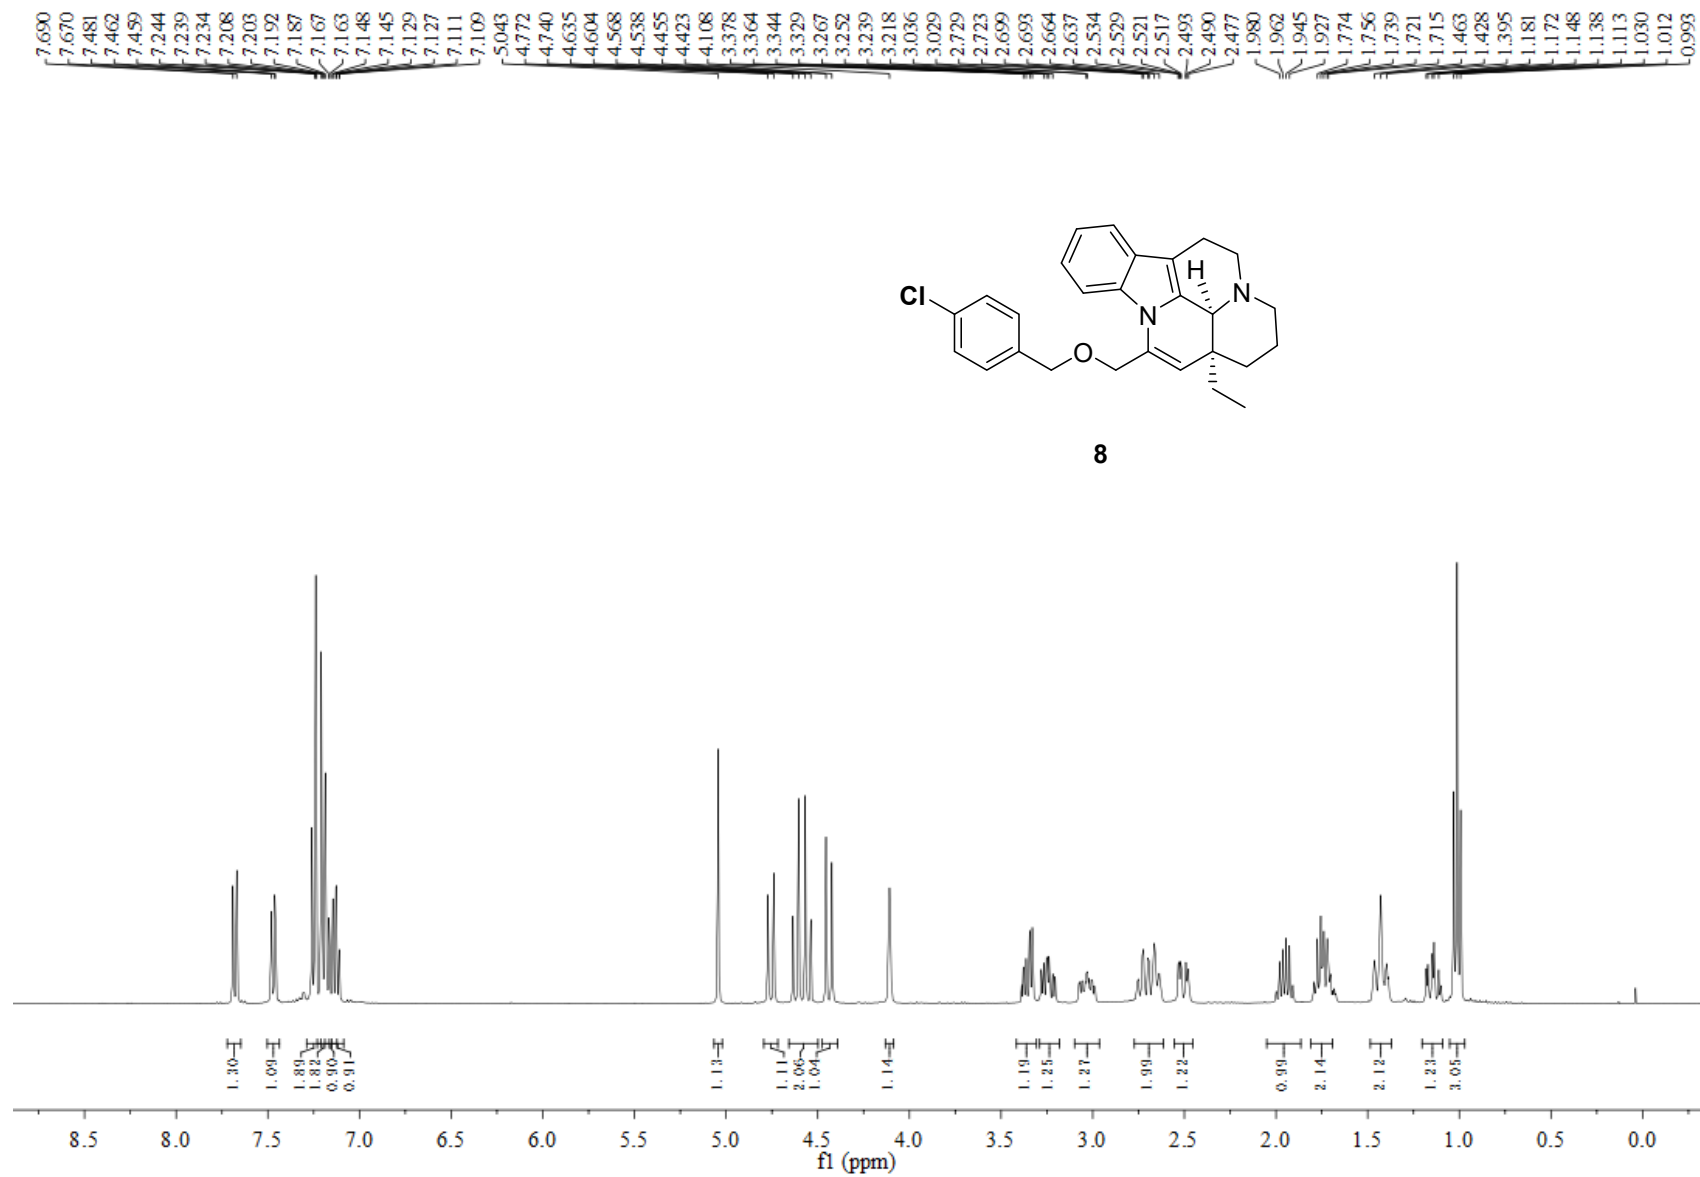

<sup>1</sup>H NMR of Compound **8** (400 MHz, CDCl<sub>3</sub>)

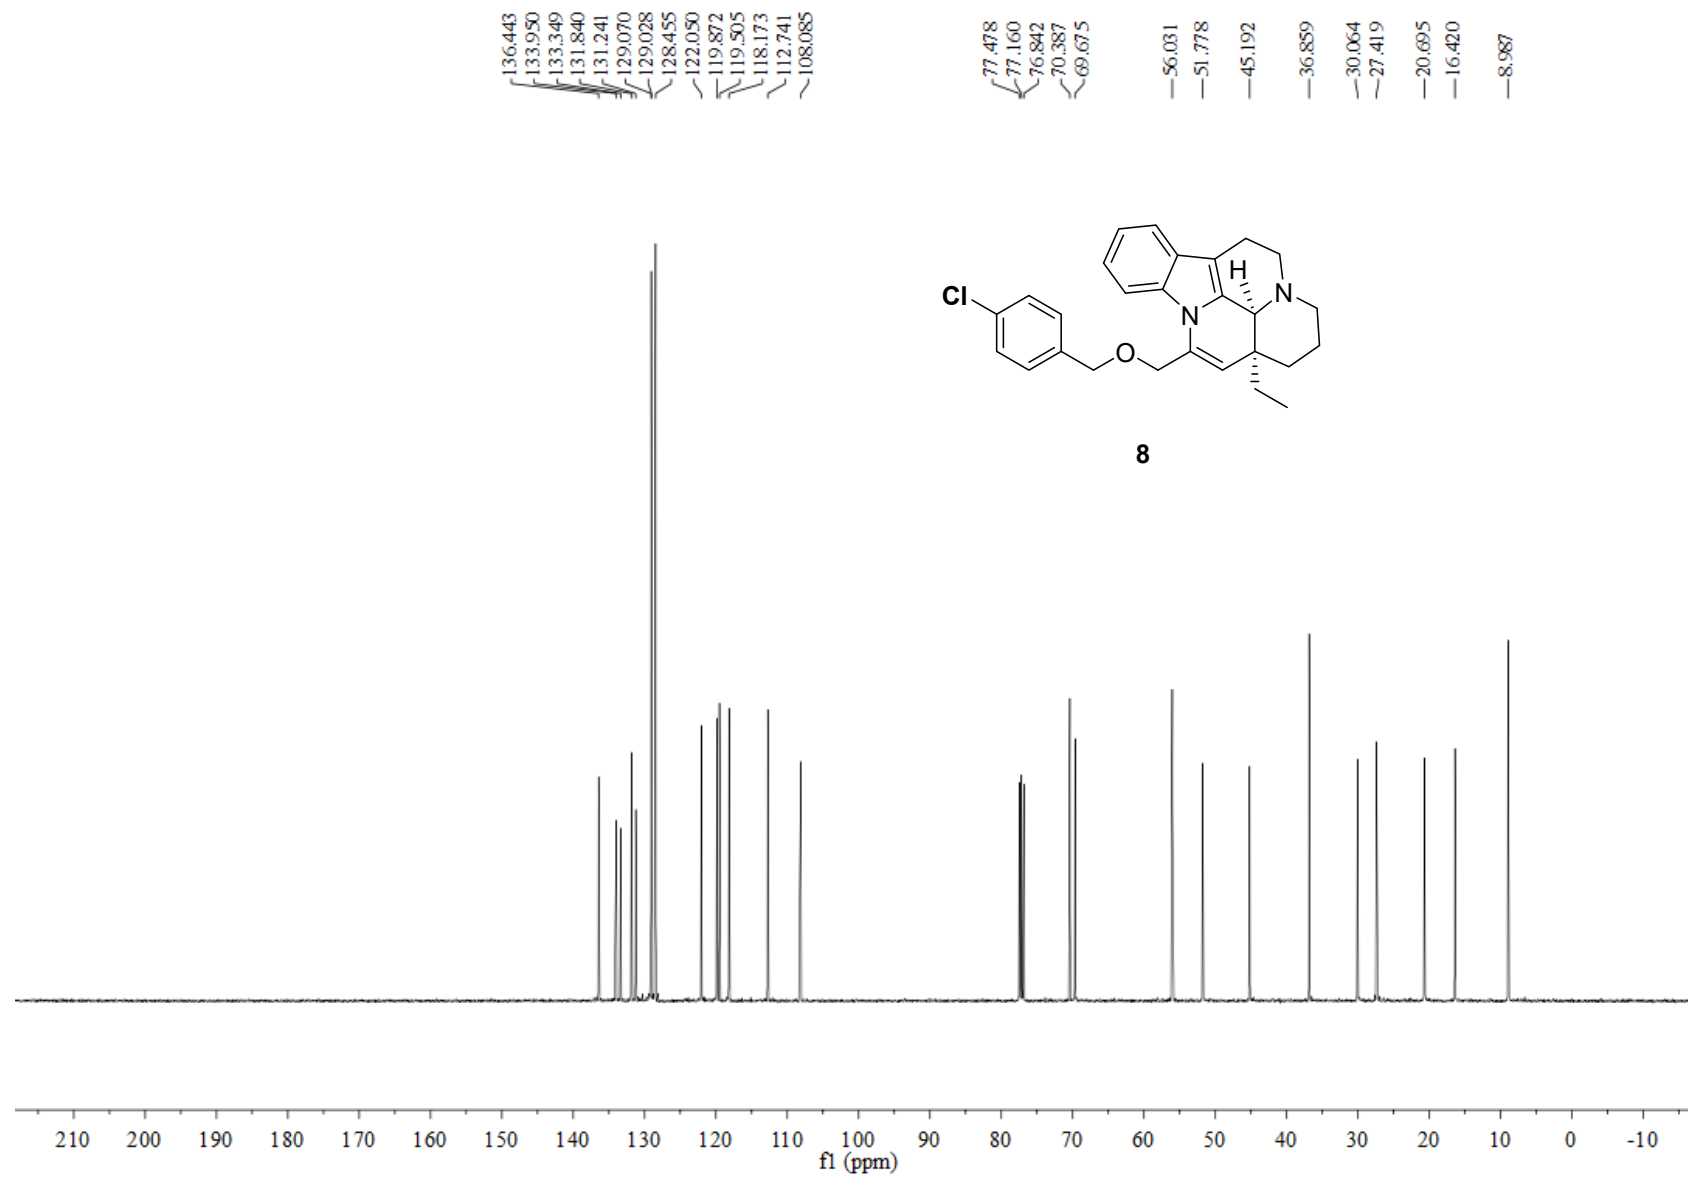

<sup>13</sup>C NMR of Compound 8 (100 MHz, CDCl<sub>3</sub>)



Item name: DA-5-16  
Item description:

Channel name: 1: Average Time 0.1174 min : TOF MS (50-1500) ESI+ : Centroided : Combined

5.38e7

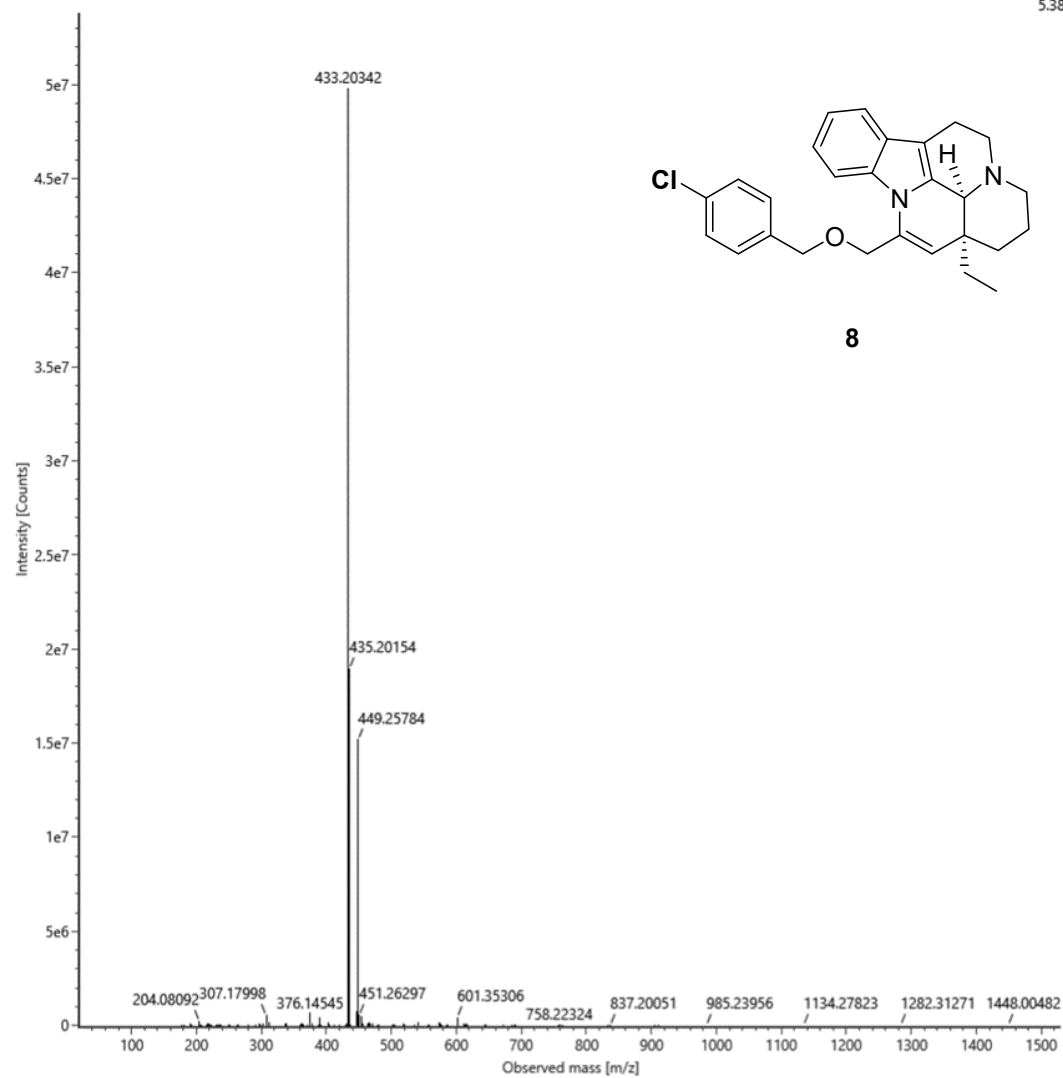

HRMS of Compound 8

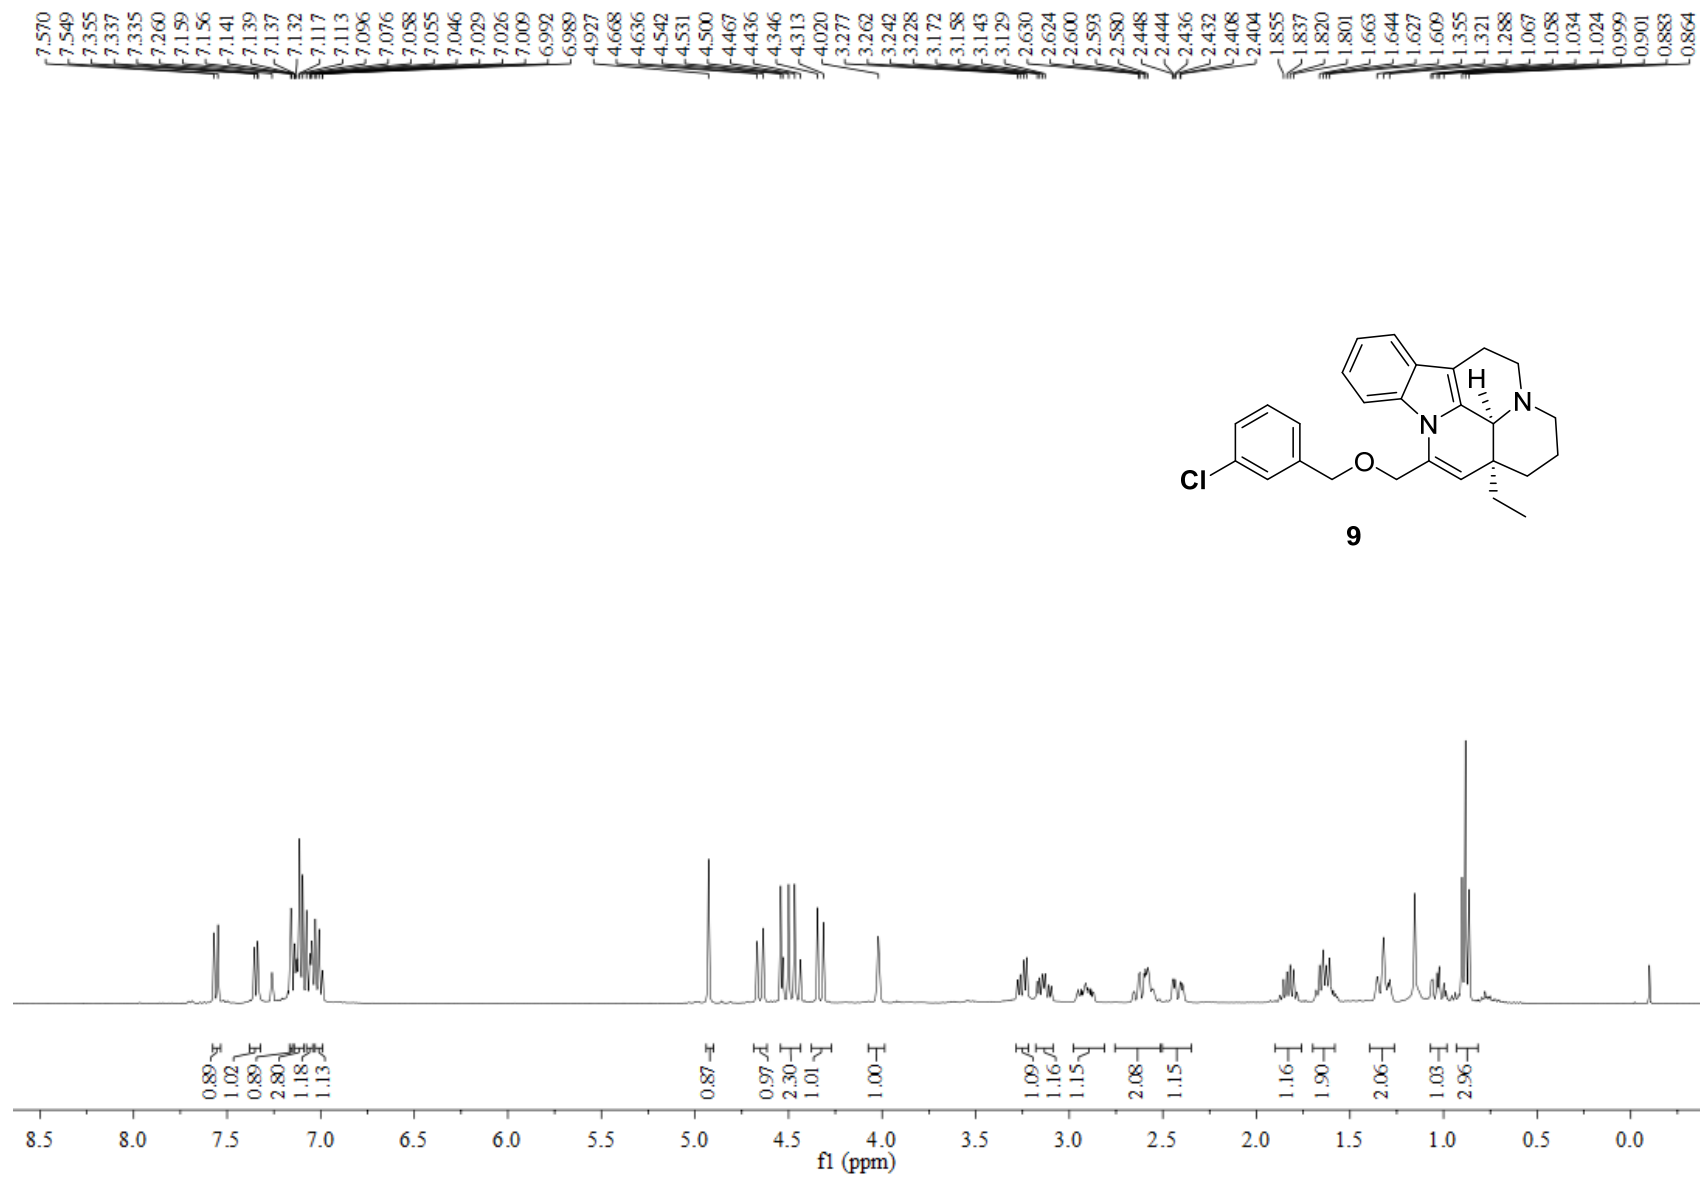

<sup>1</sup>H NMR of Compound **9** (400 MHz, CDCl<sub>3</sub>)

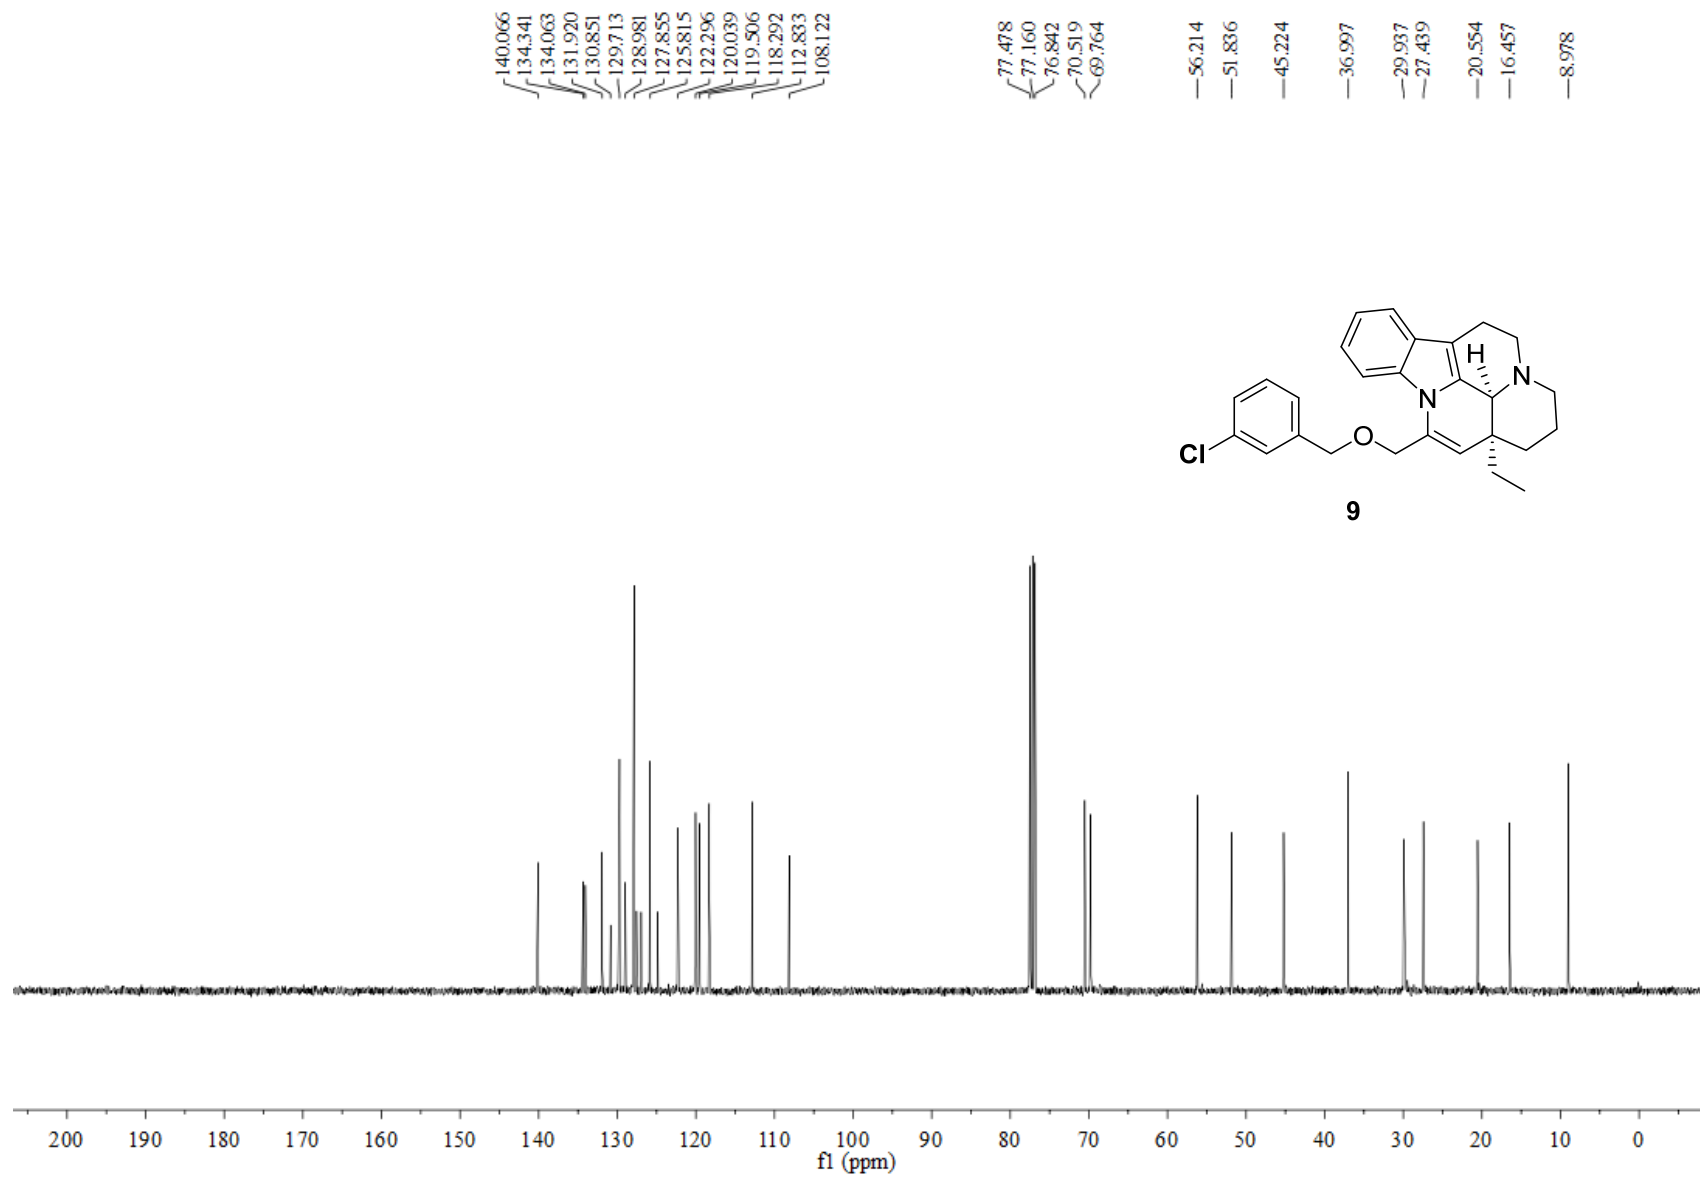

<sup>13</sup>C NMR of Compound **9** (100 MHz, CDCl<sub>3</sub>)

Item name: DB-60-30  
Item description:

Channel name: 1: Average Time 0.0831 min : TOF MS (50-1500) ESI+ : Centroided : Combined

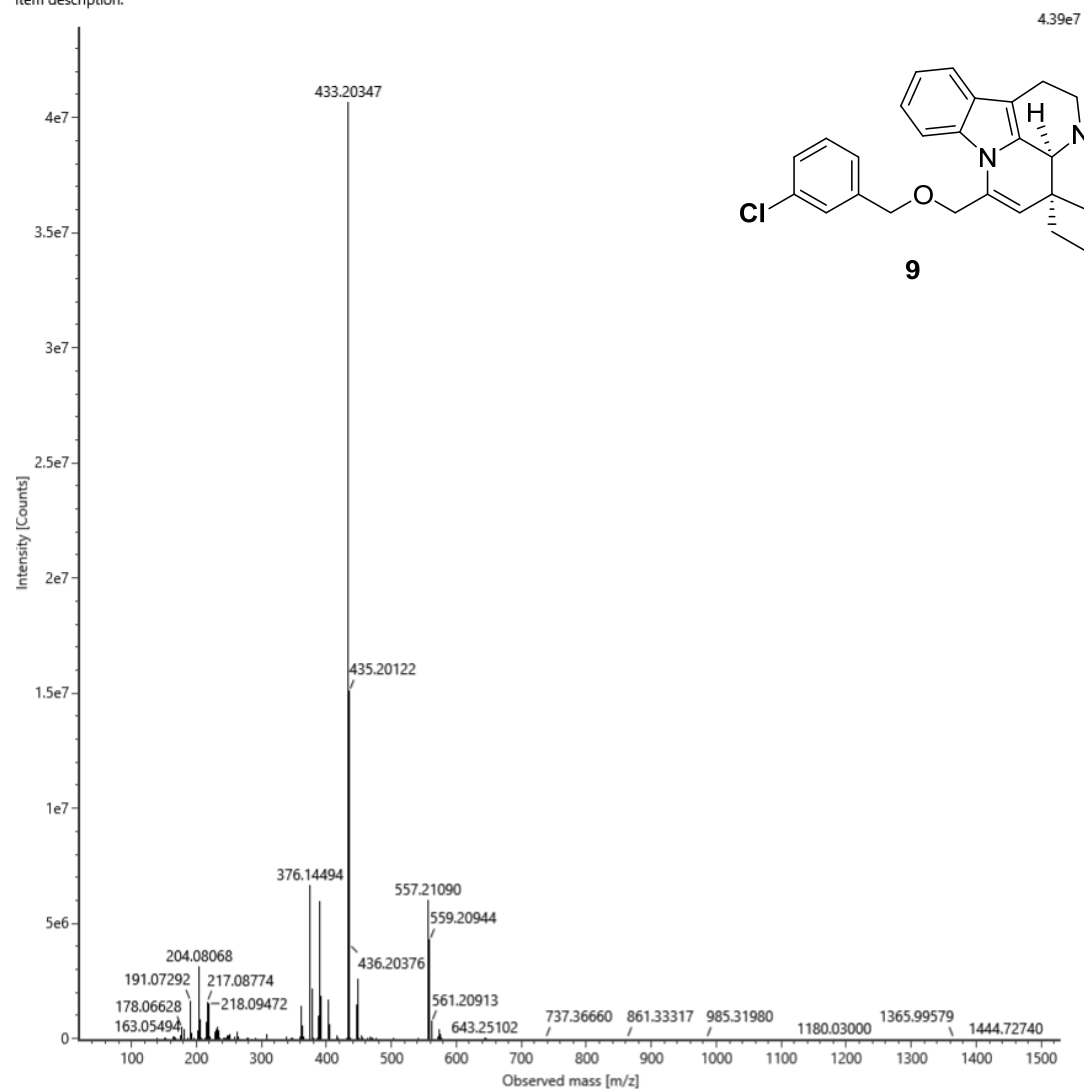

HRMS of Compound **9**

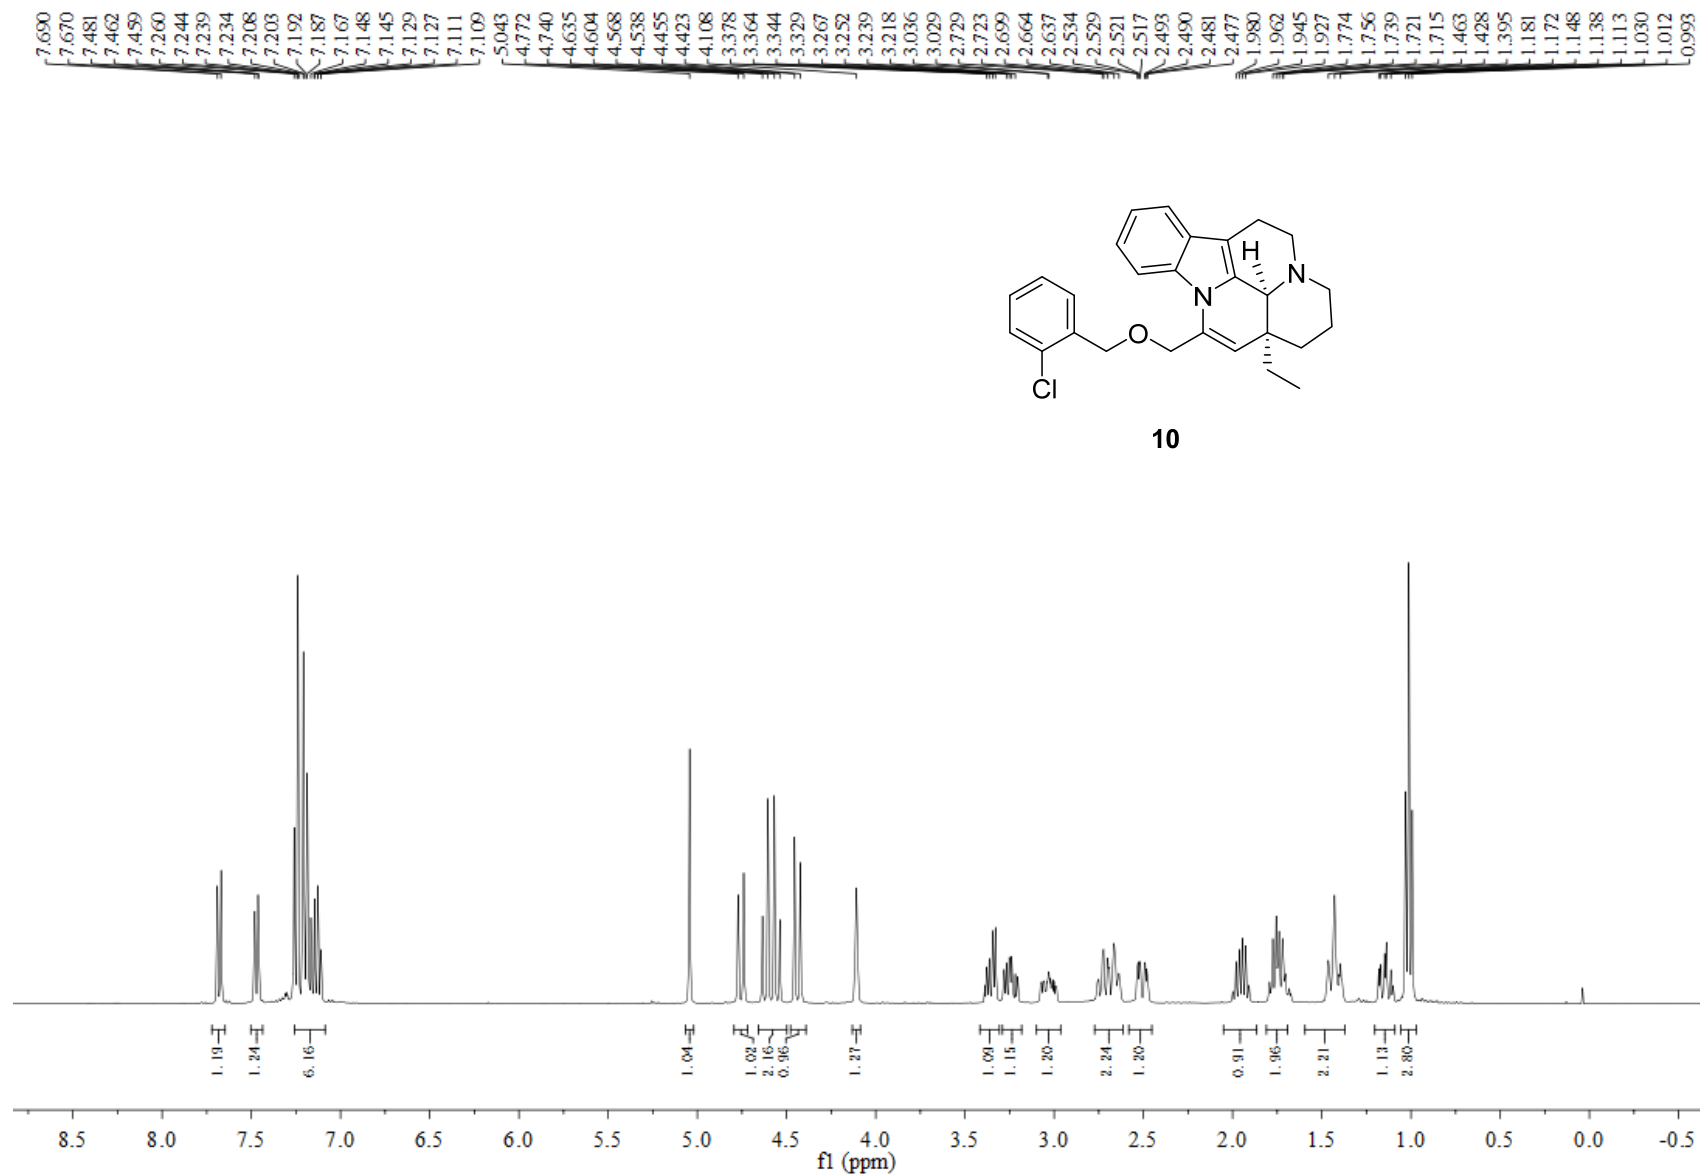

<sup>1</sup>H NMR of Compound **10** (400 MHz, CDCl<sub>3</sub>)

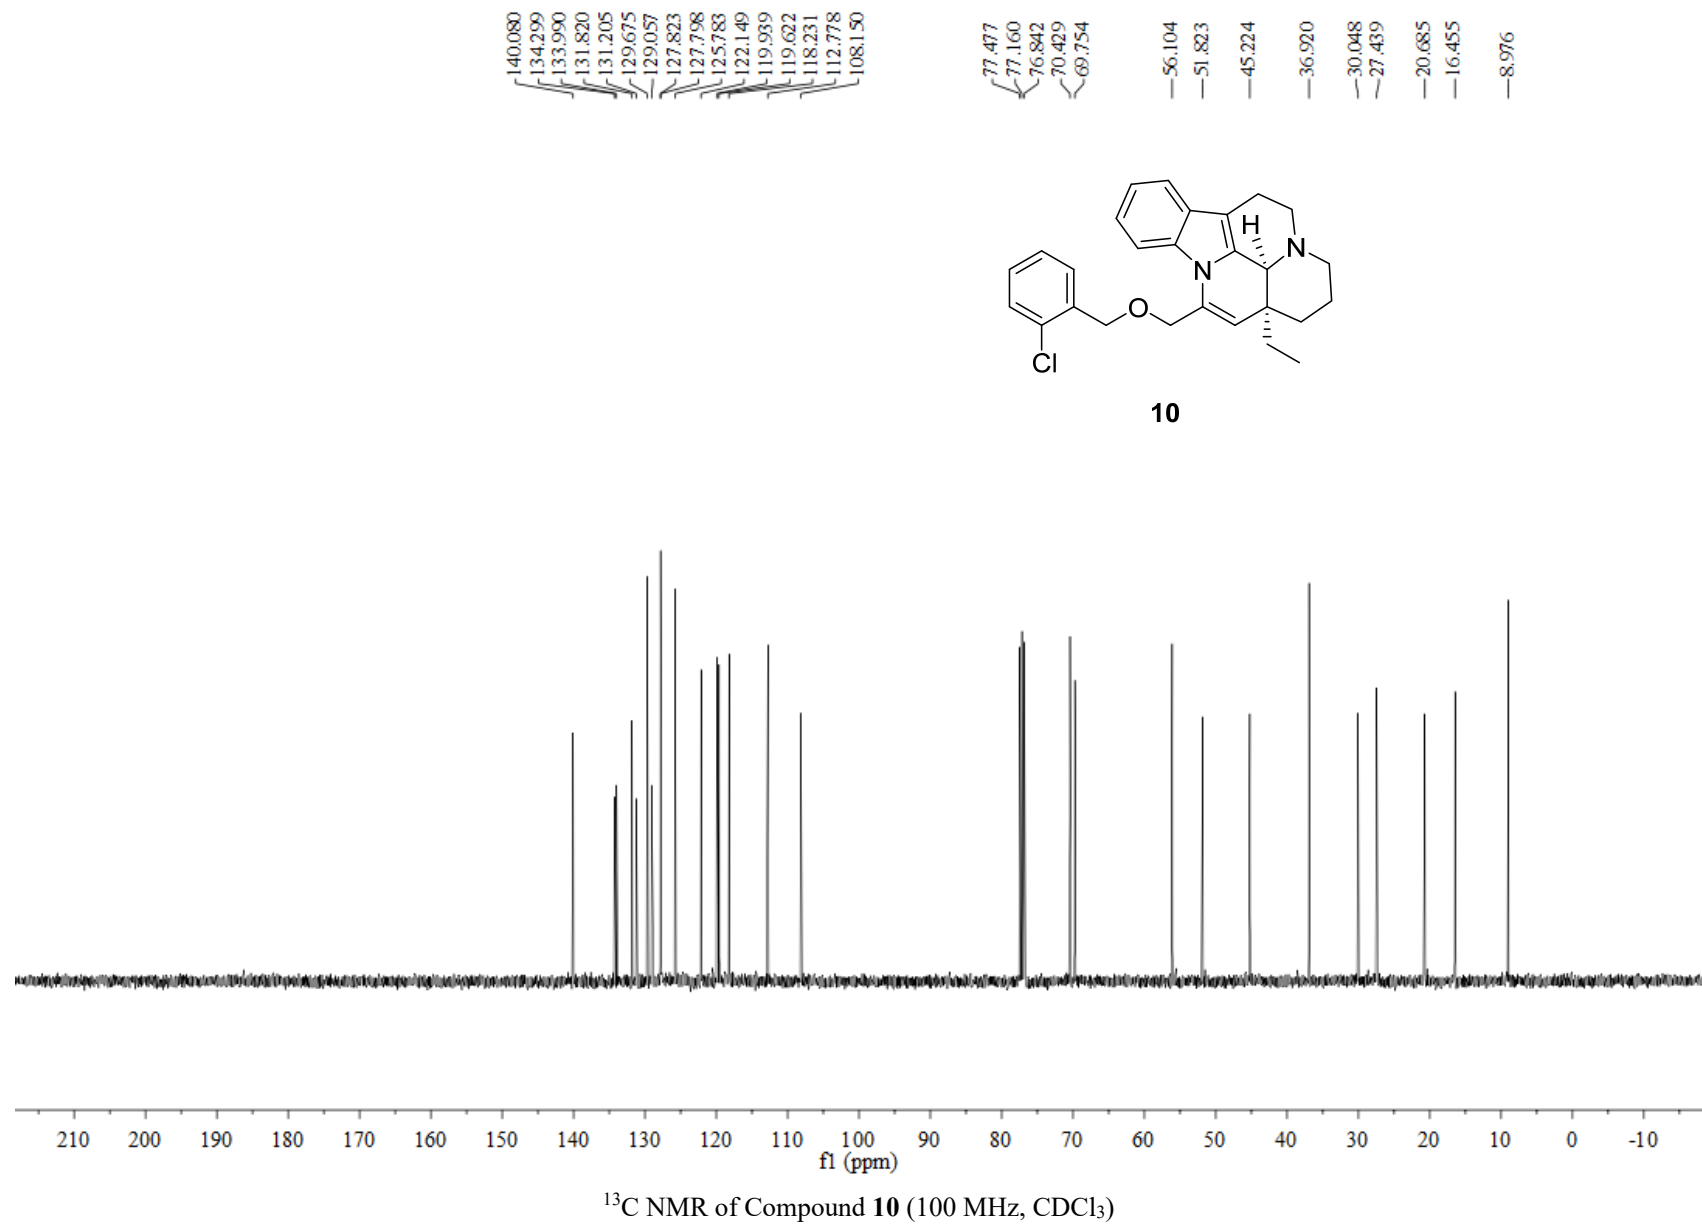

Item name: DB-60-14  
Item description:

Channel name: 1: Average Time 0.0874 min : TOF MS (50-1500) ESI+ : Centroided : Combined

6.15e7

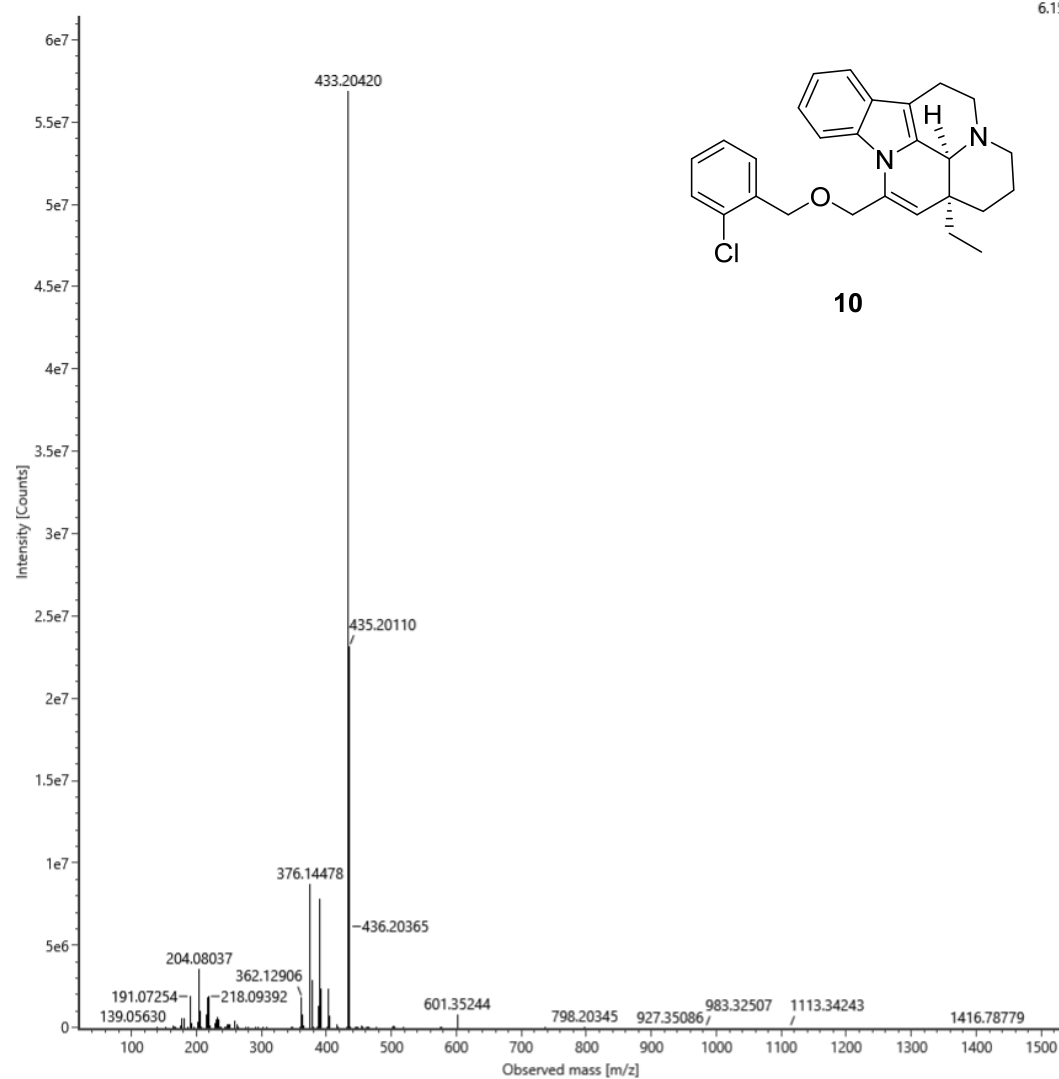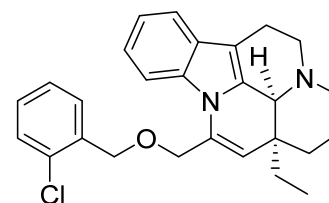

**10**

HRMS of Compound **10**

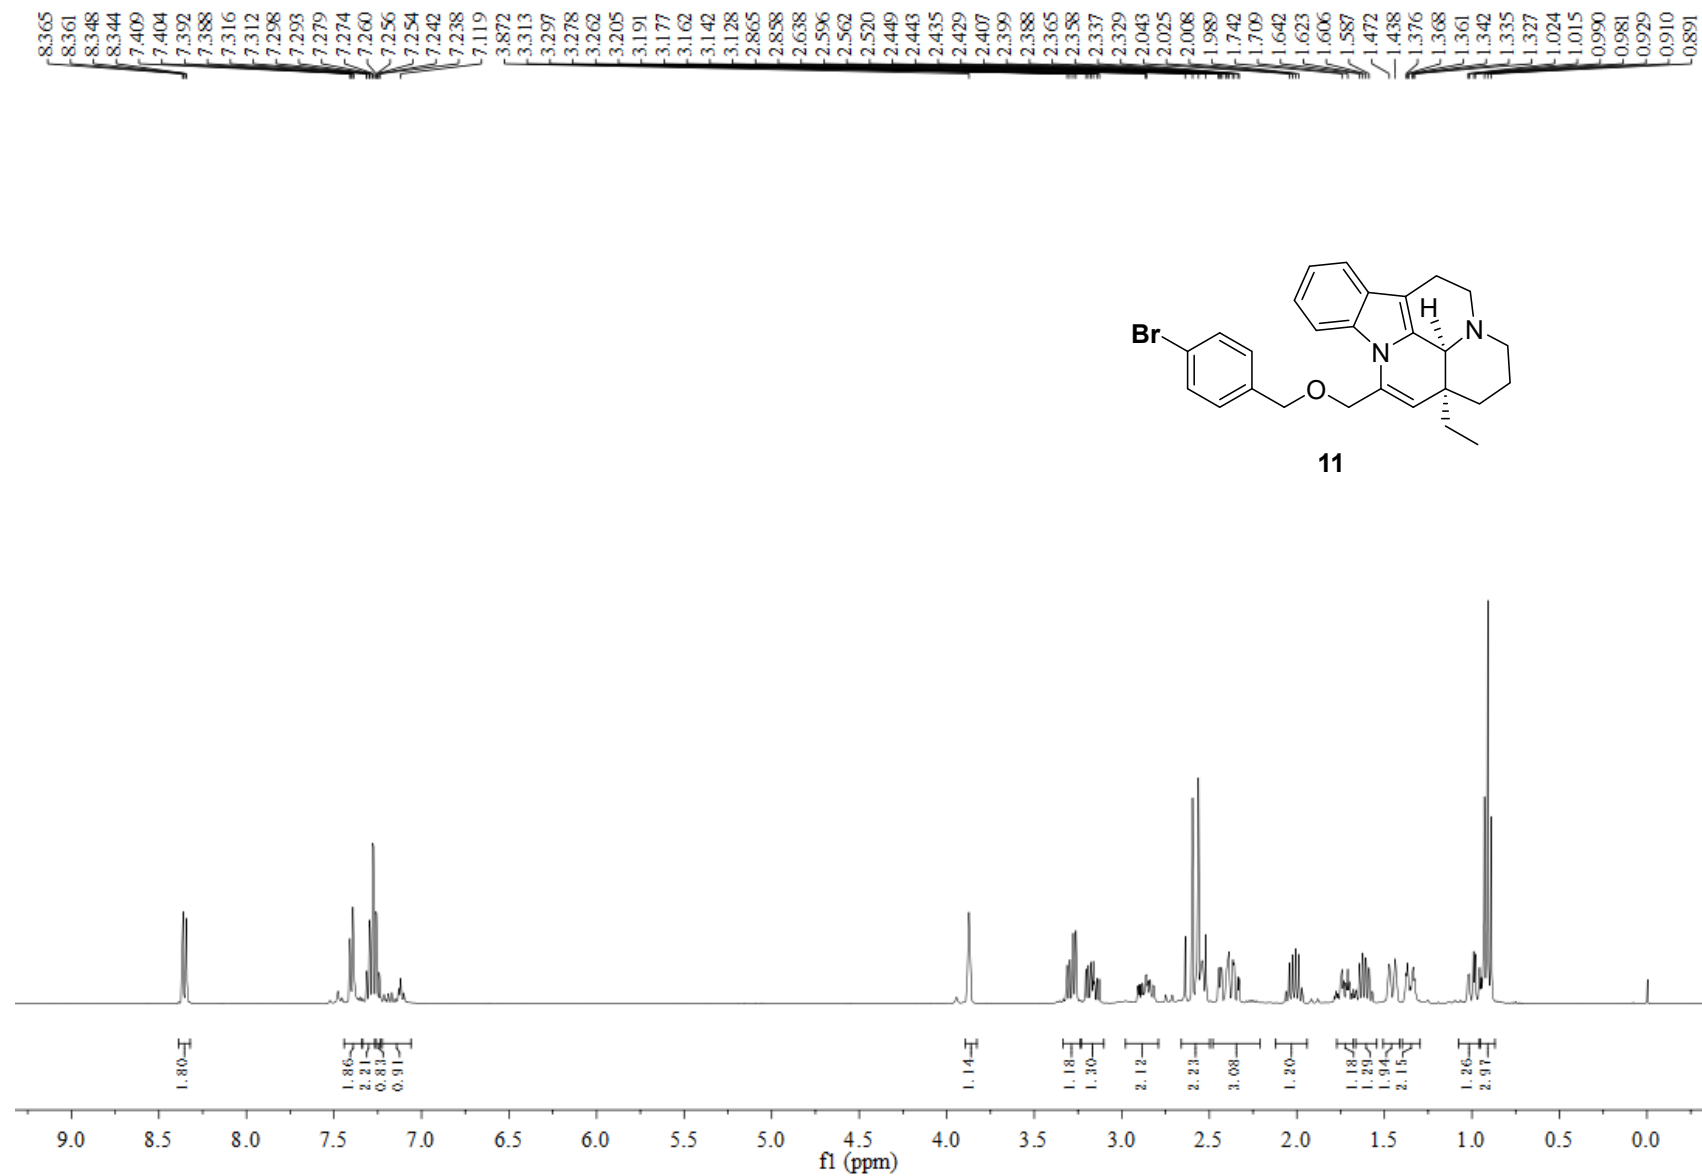

$^1\text{H}$  NMR of Compound **11** (400 MHz,  $\text{CDCl}_3$ )



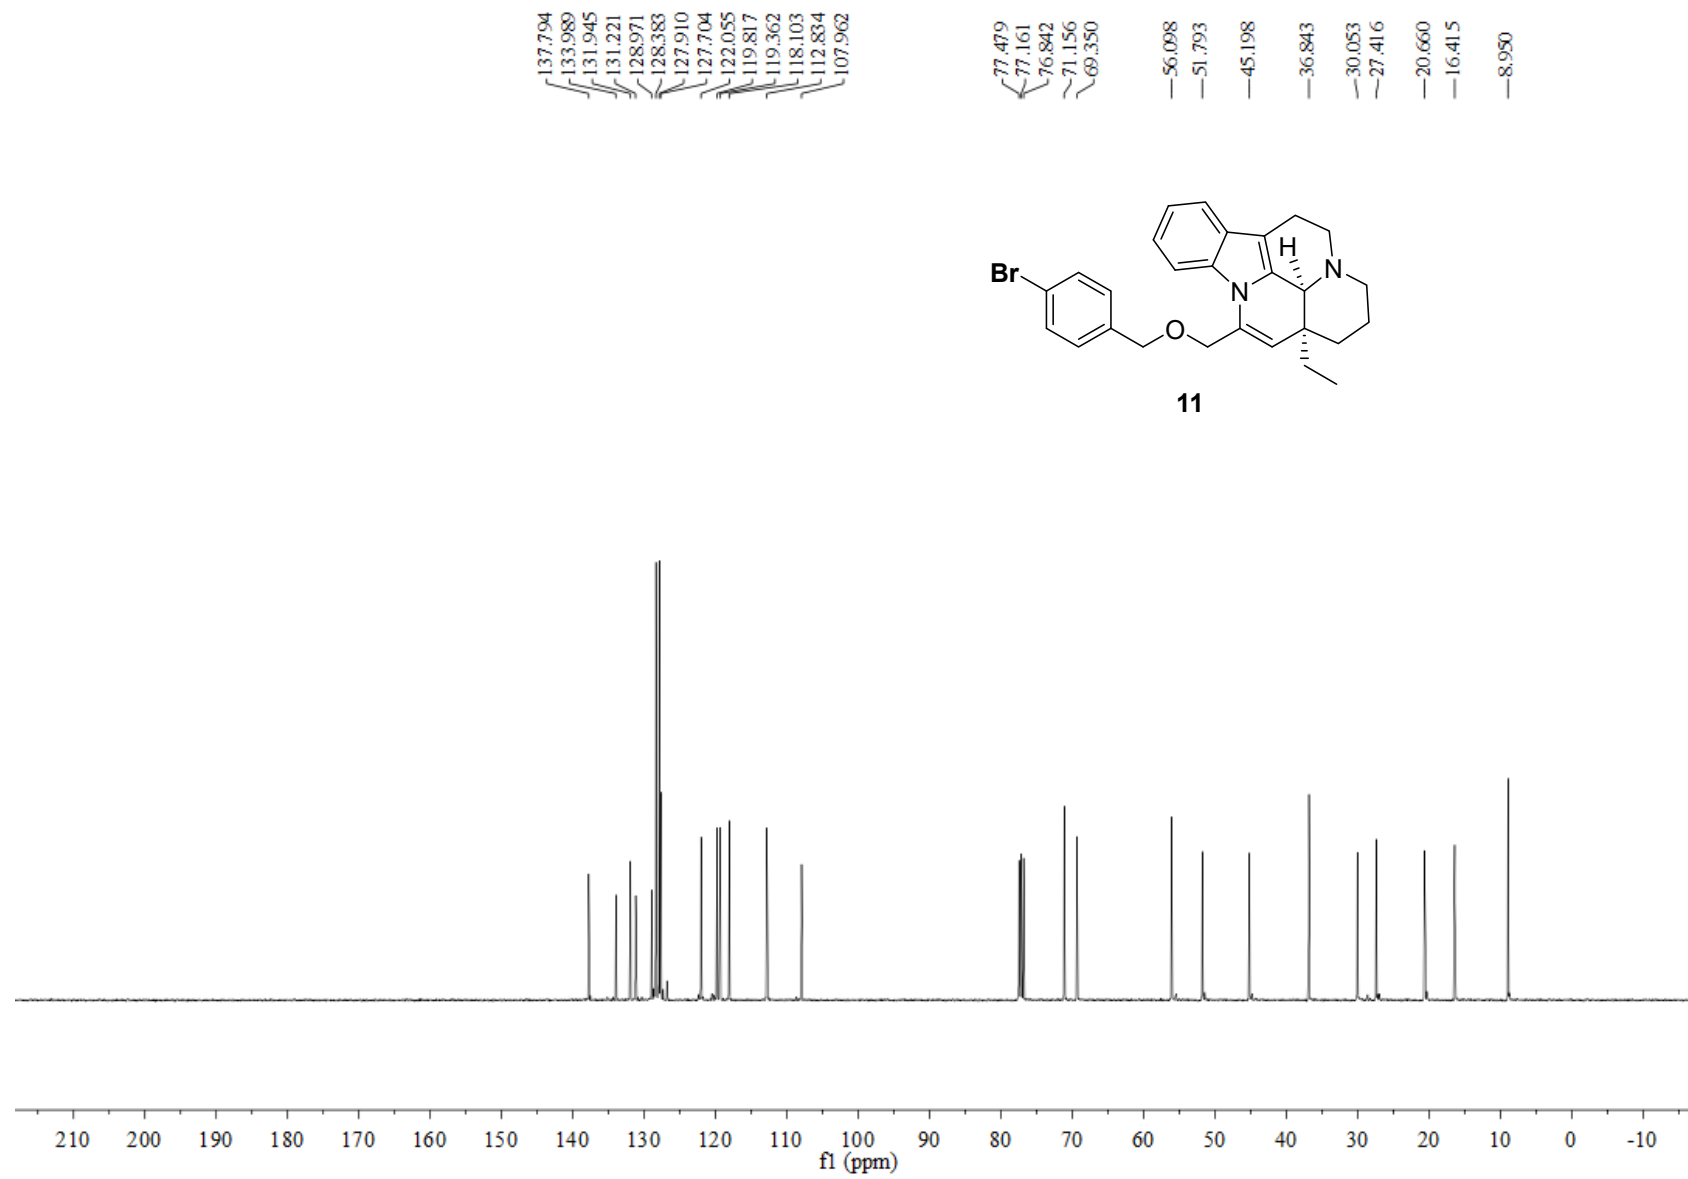

<sup>13</sup>C NMR of Compound **11** (100 MHz, CDCl<sub>3</sub>)

Item name: DB-60-5-1  
Item description:

Channel name: 1: Average Time 0.1089 min : TOF MS (50-1500) ESI+ : Centroided : Combined

5.85e7

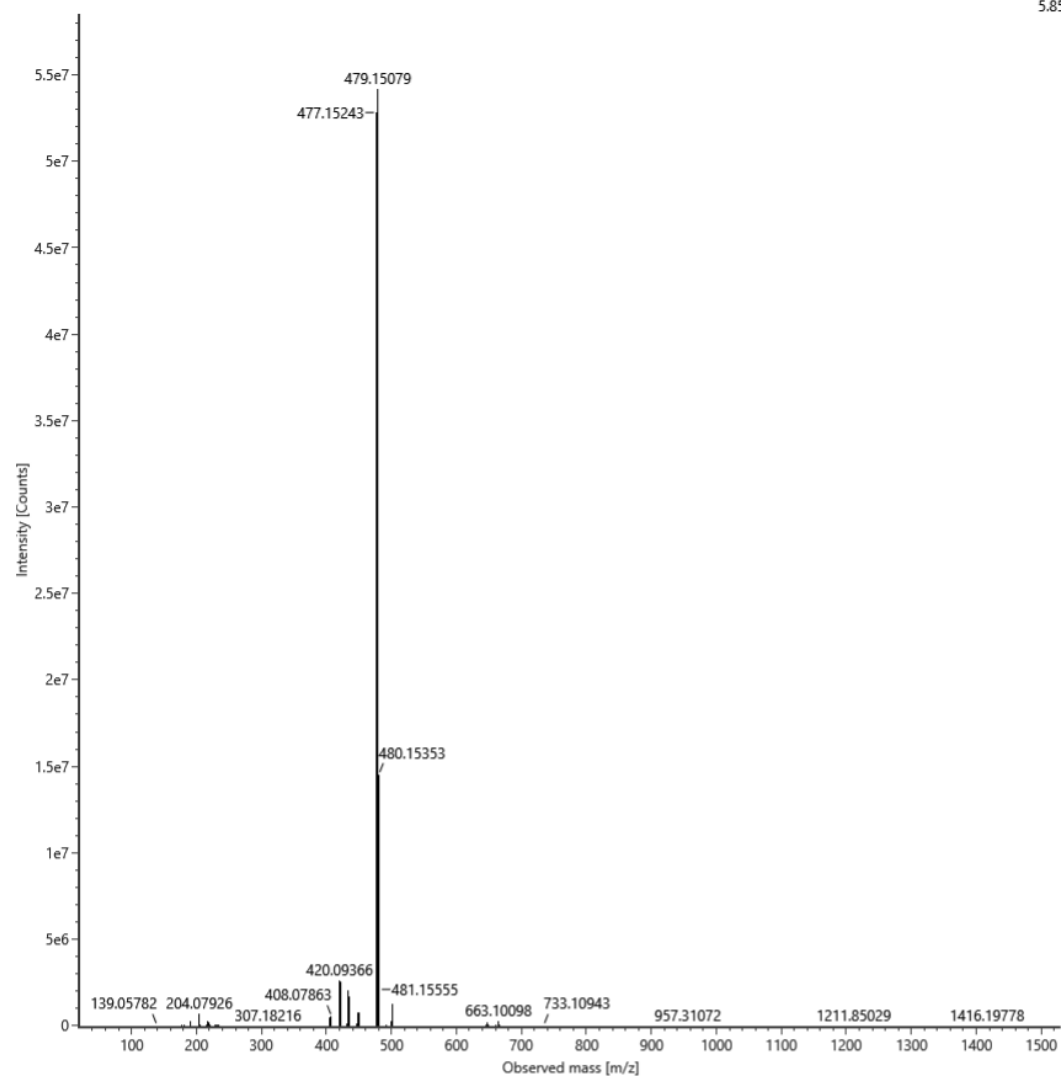

HRMS of Compound **11**

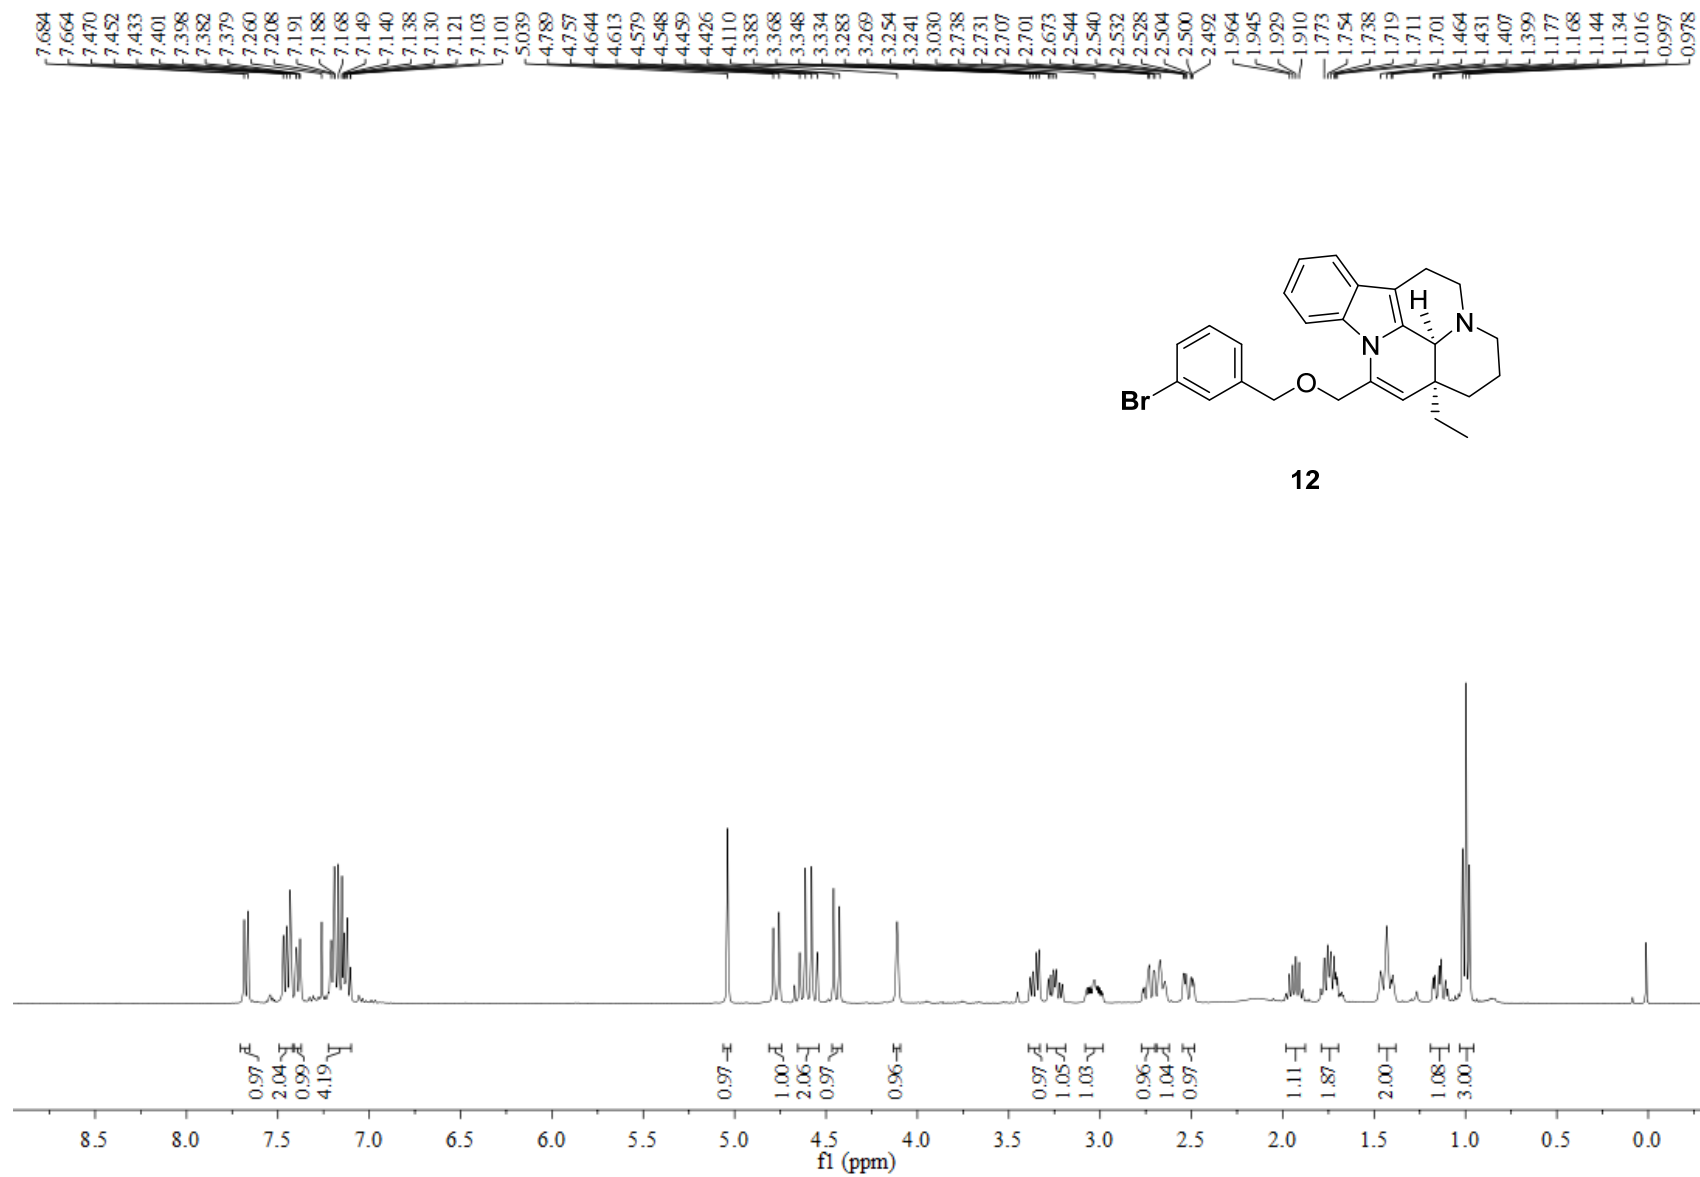

<sup>1</sup>H NMR of Compound 12 (400 MHz, CDCl<sub>3</sub>)

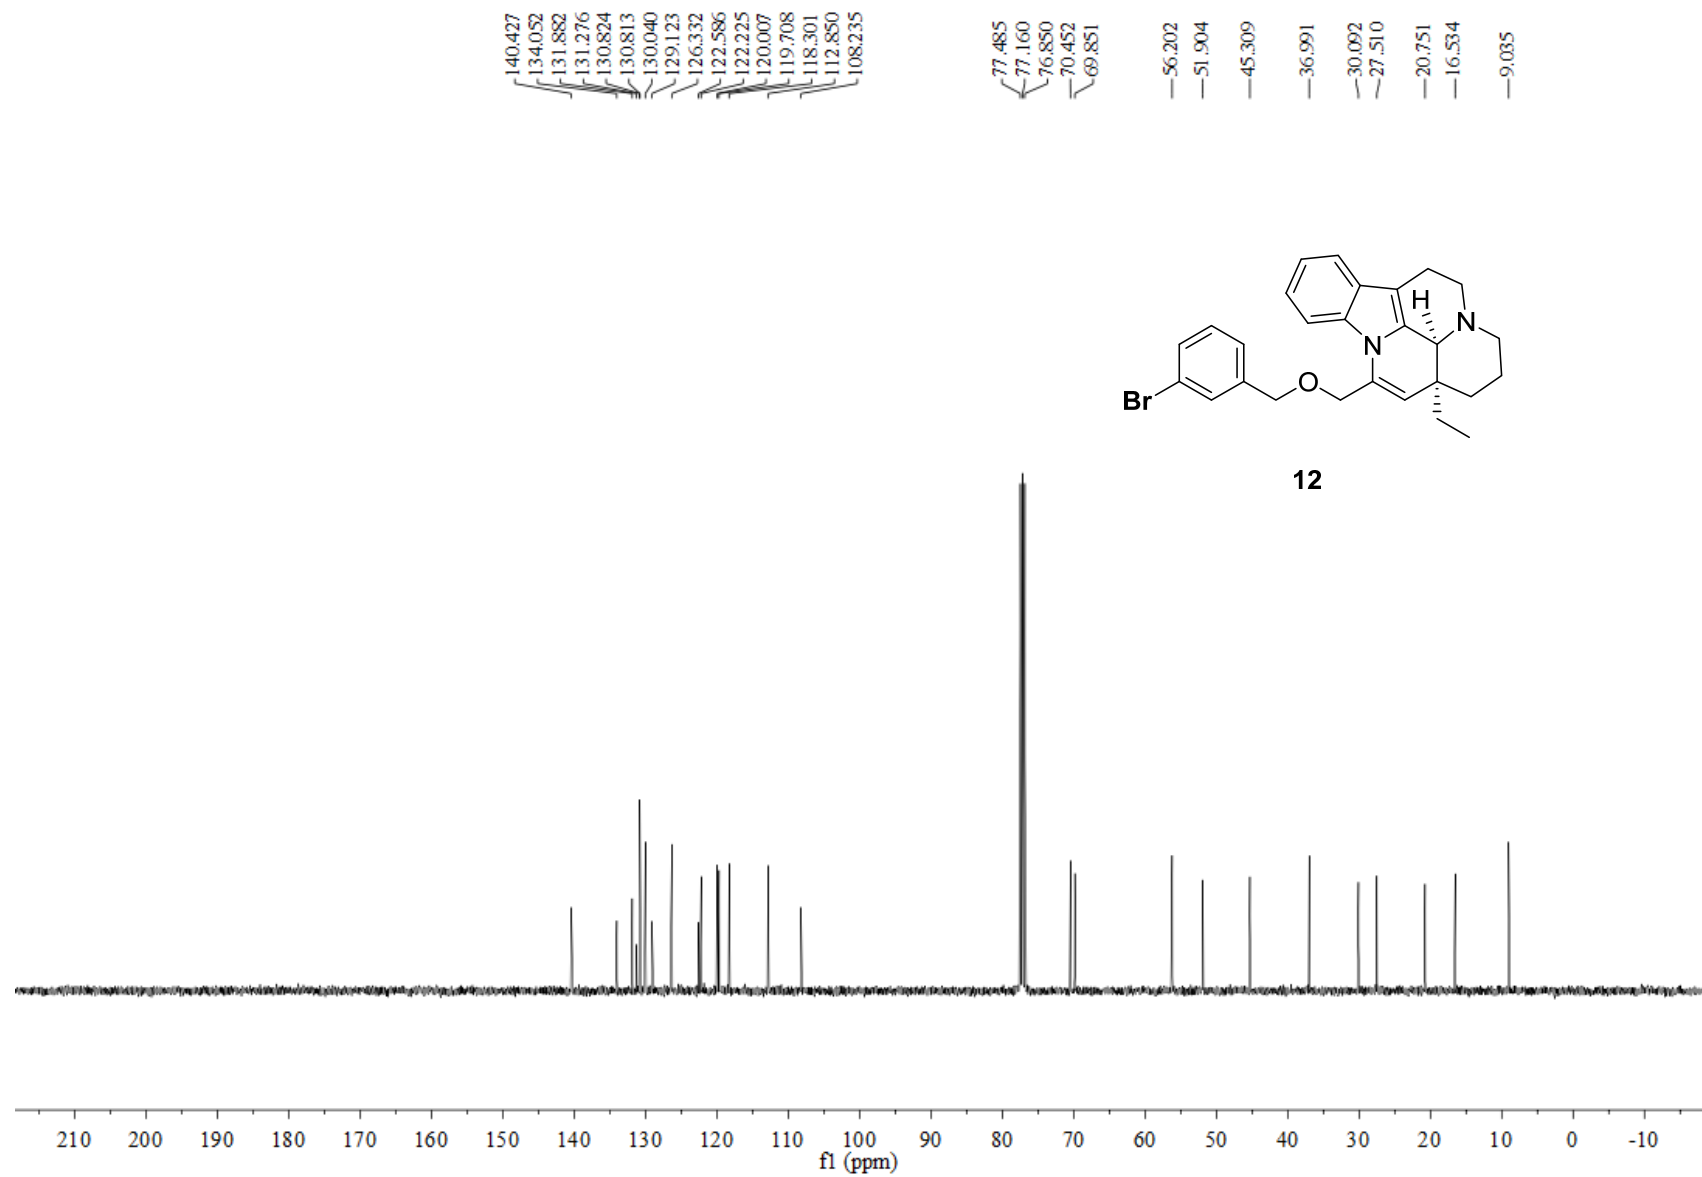

<sup>13</sup>C NMR of Compound **12** (100 MHz, CDCl<sub>3</sub>)

Item name: DB-60-3-1  
Item description:

Channel name: 1: Average Time 0.1217 min : TOF MS (50-1500) ESI+ : Centroided : Combined

7.05e7

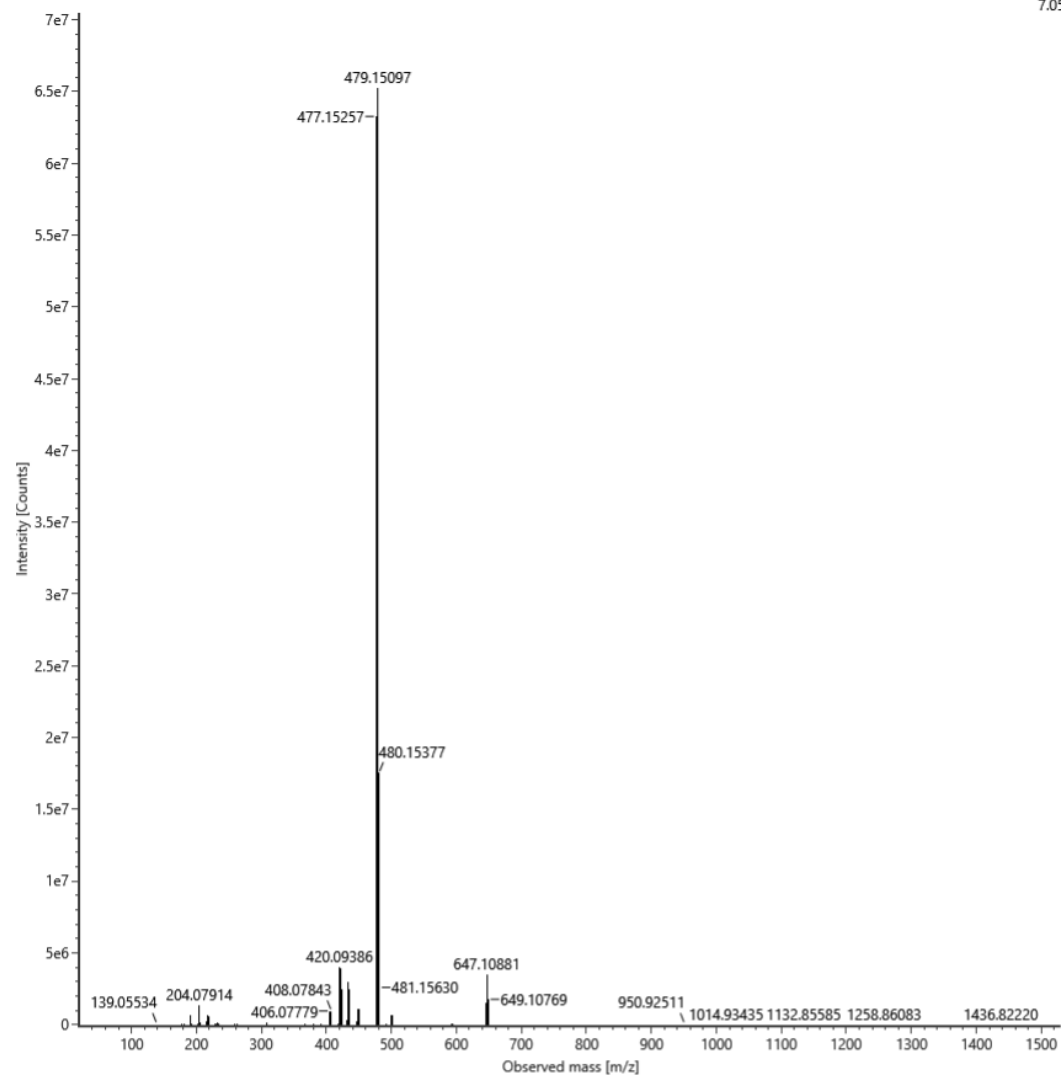

HRMS of Compound 12

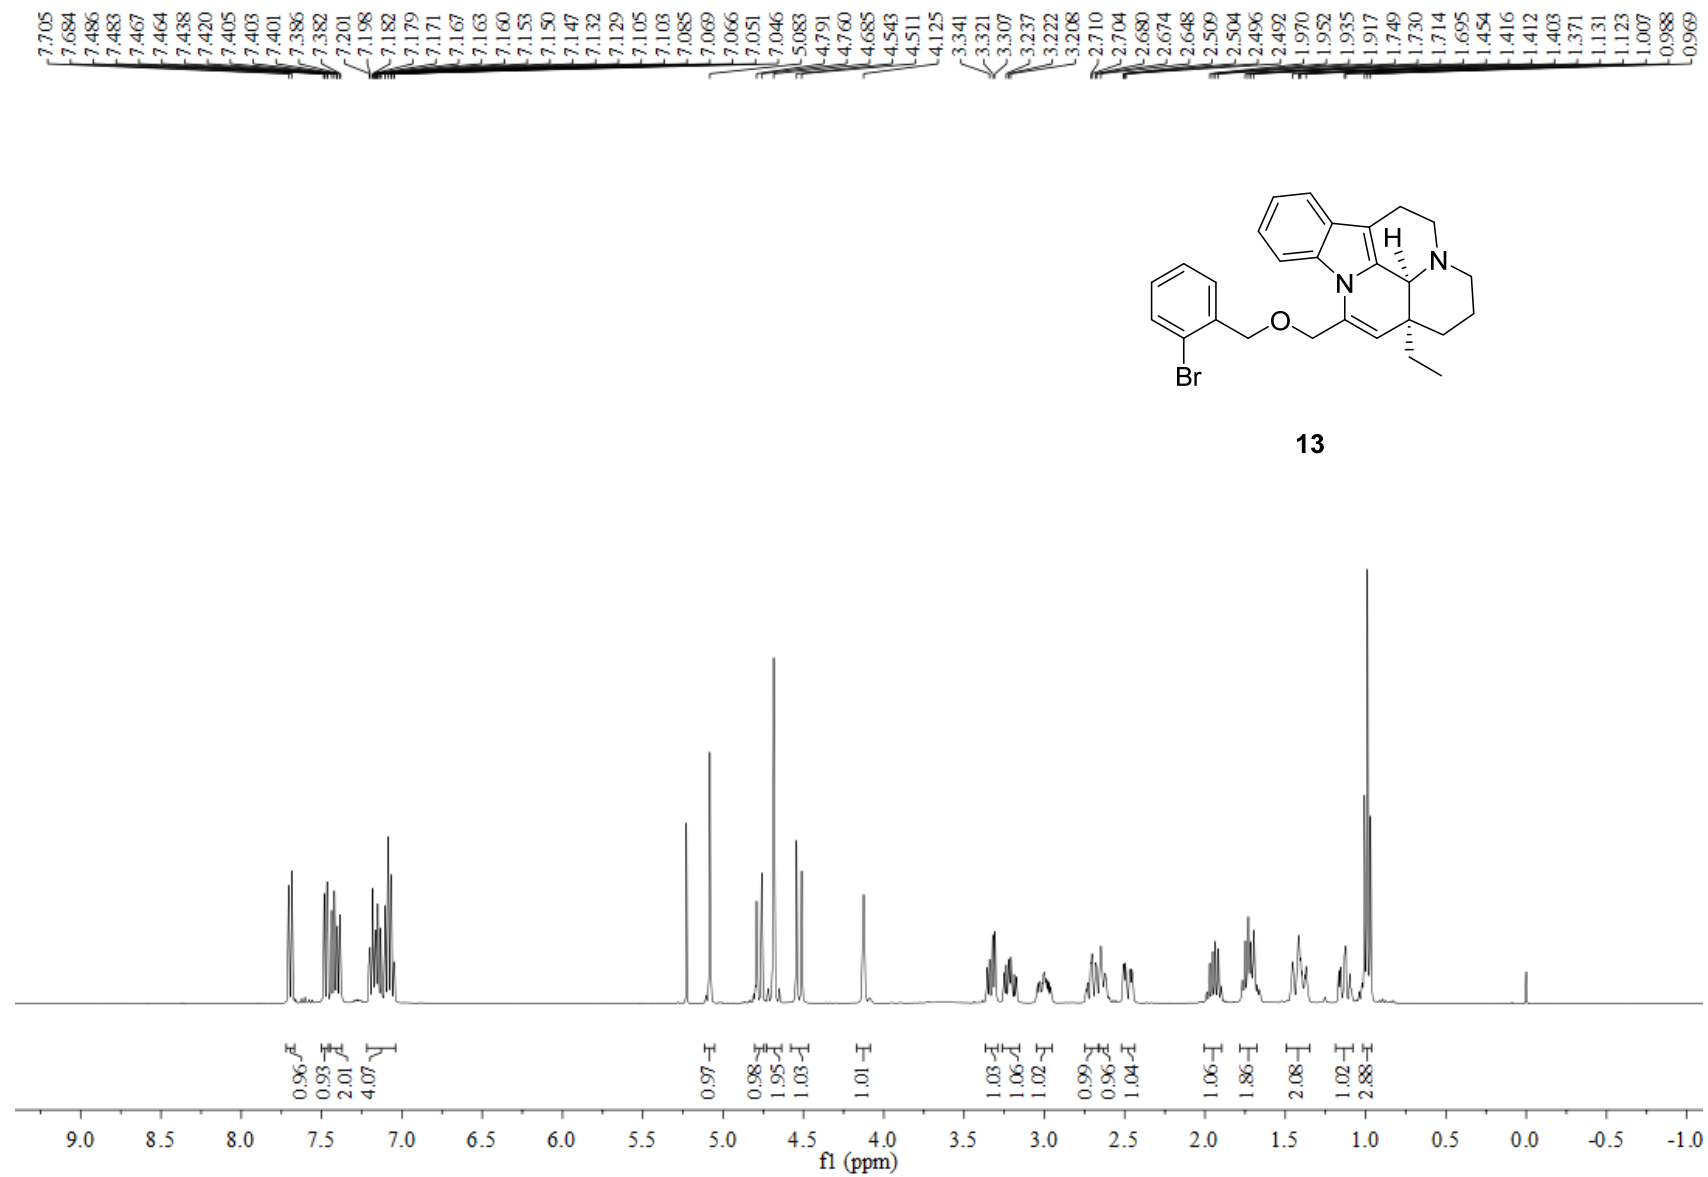

<sup>1</sup>H NMR of Compound **13** (400 MHz, CDCl<sub>3</sub>)

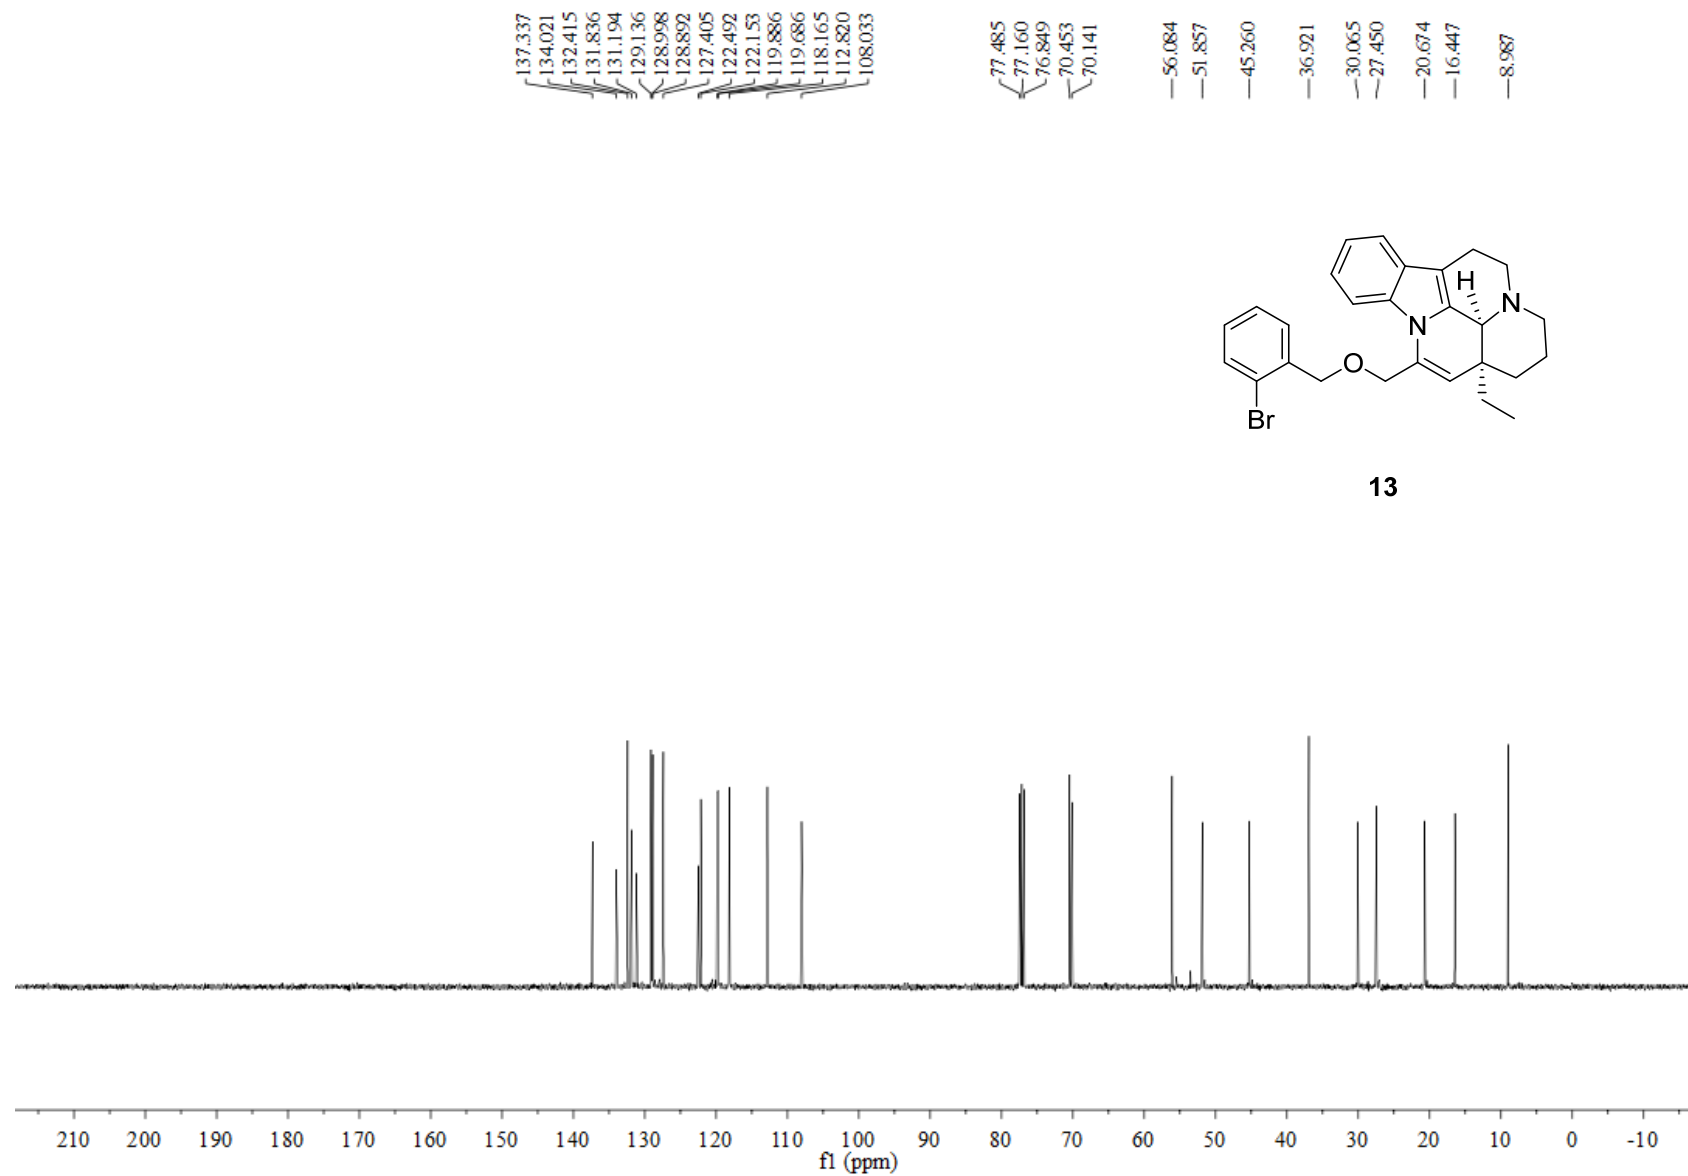

<sup>13</sup>C NMR of Compound **13** (100 MHz, CDCl<sub>3</sub>)

Item name: DB-60-24  
Item description:

Channel name: 1: Average Time 0.0831 min : TOF MS (50-1500) ESI+ : Centroided : Combined

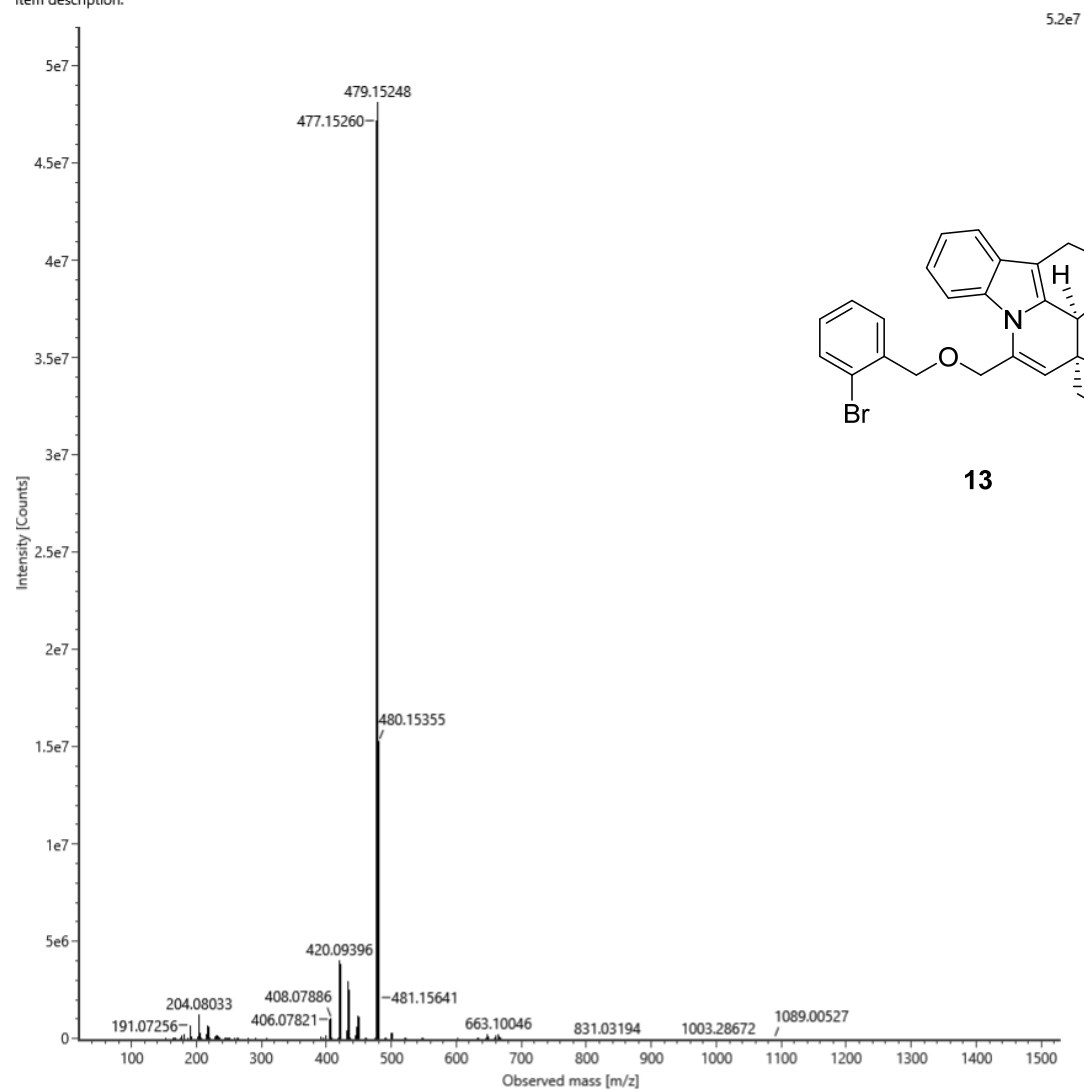

HRMS of Compound **13**



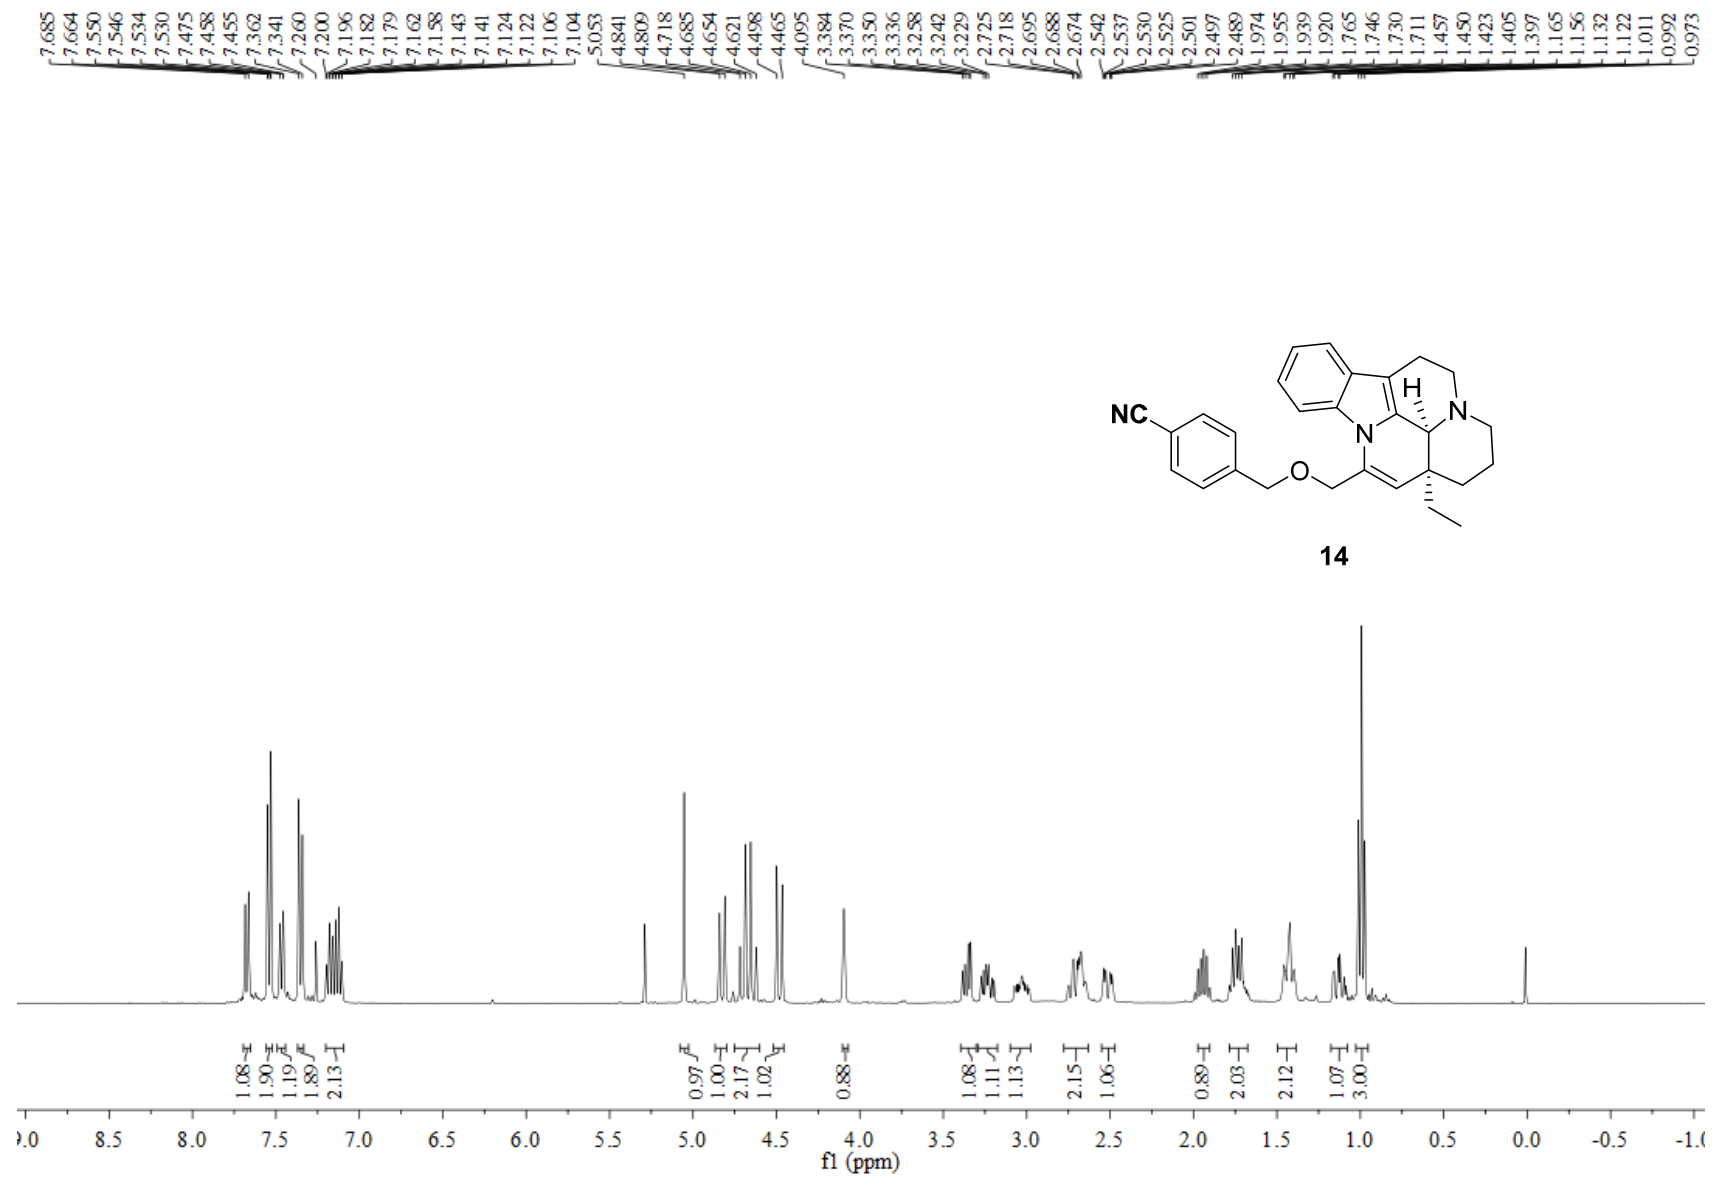

<sup>1</sup>H NMR of Compound **14** (400 MHz, CDCl<sub>3</sub>)

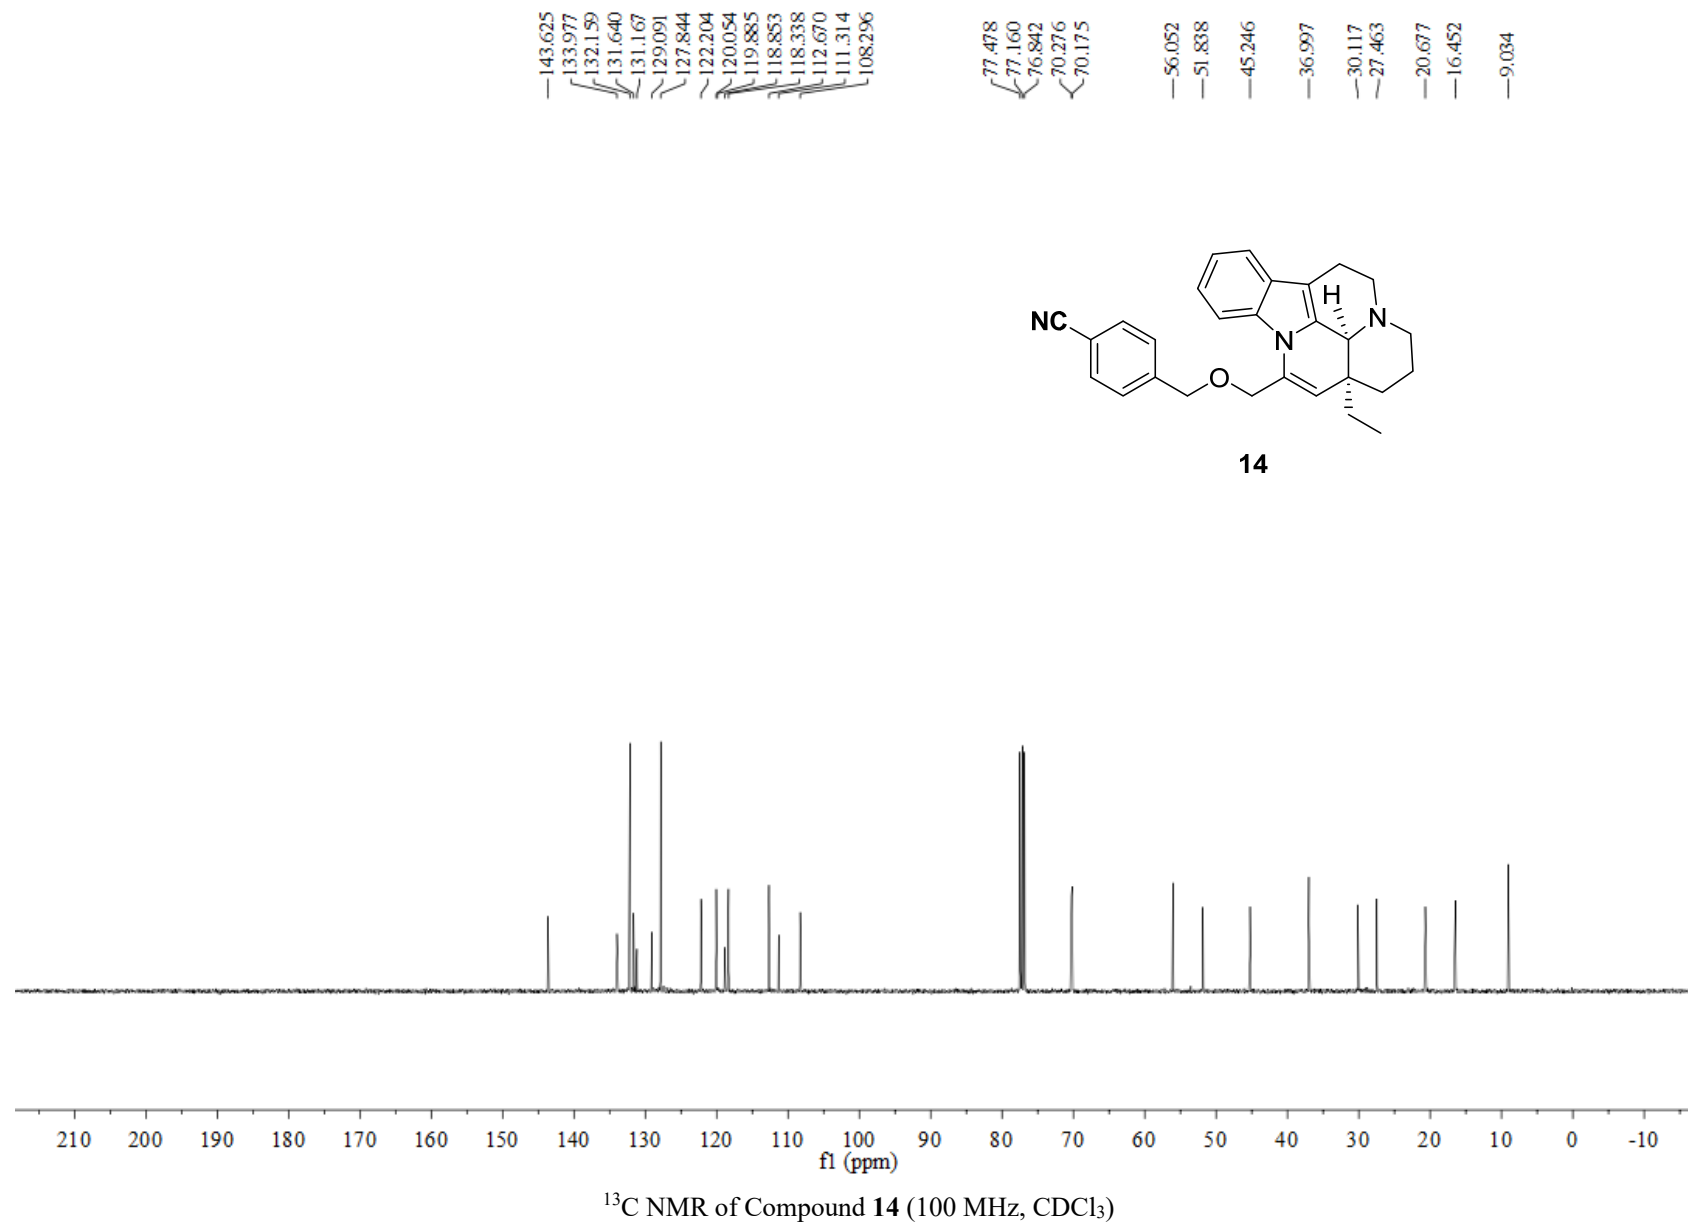

Item name: DB-60-31  
Item description:

Channel name: 1: Average Time 0.0874 min : TOF MS (50-1500) ESI+ : Centroided : Combined

5.8e7

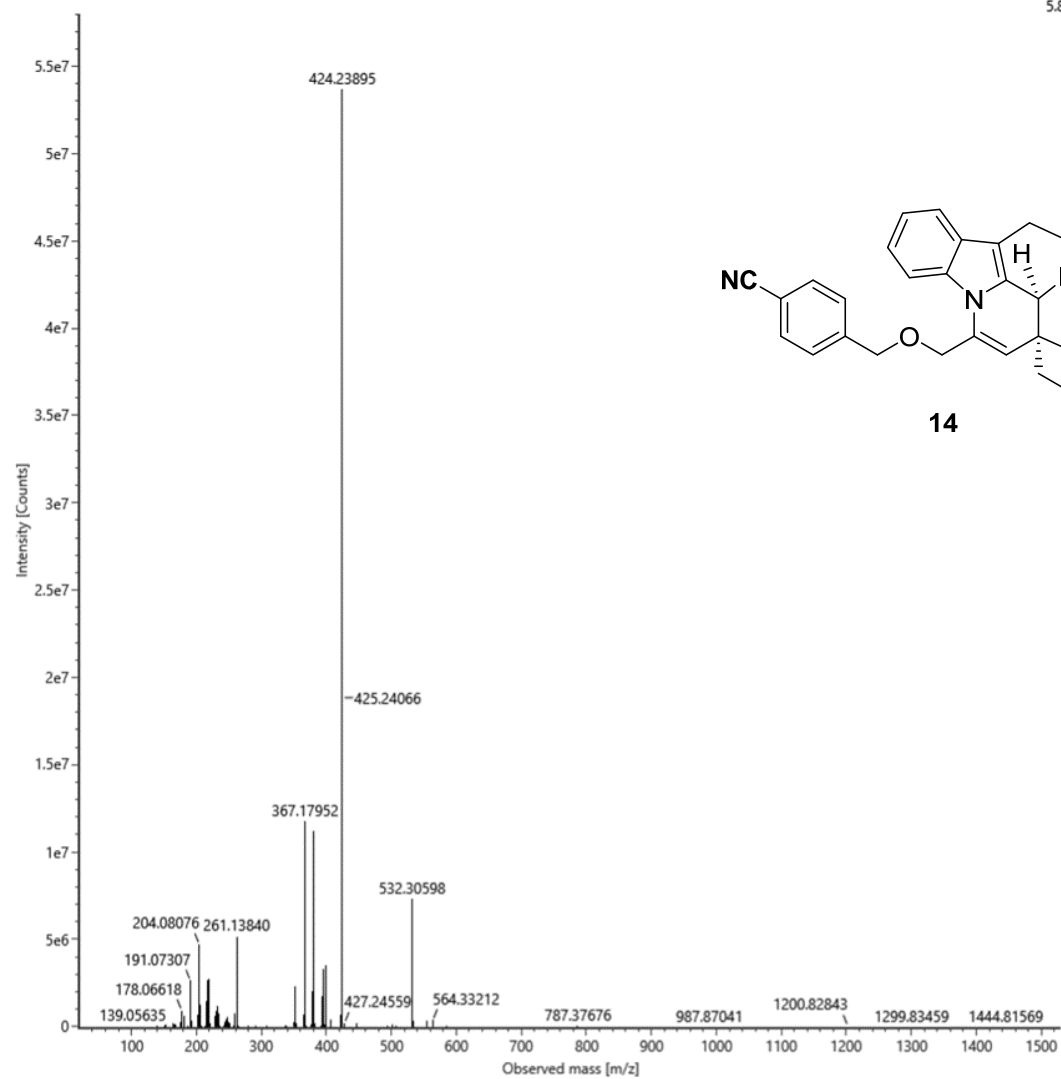

HRMS of Compound 14

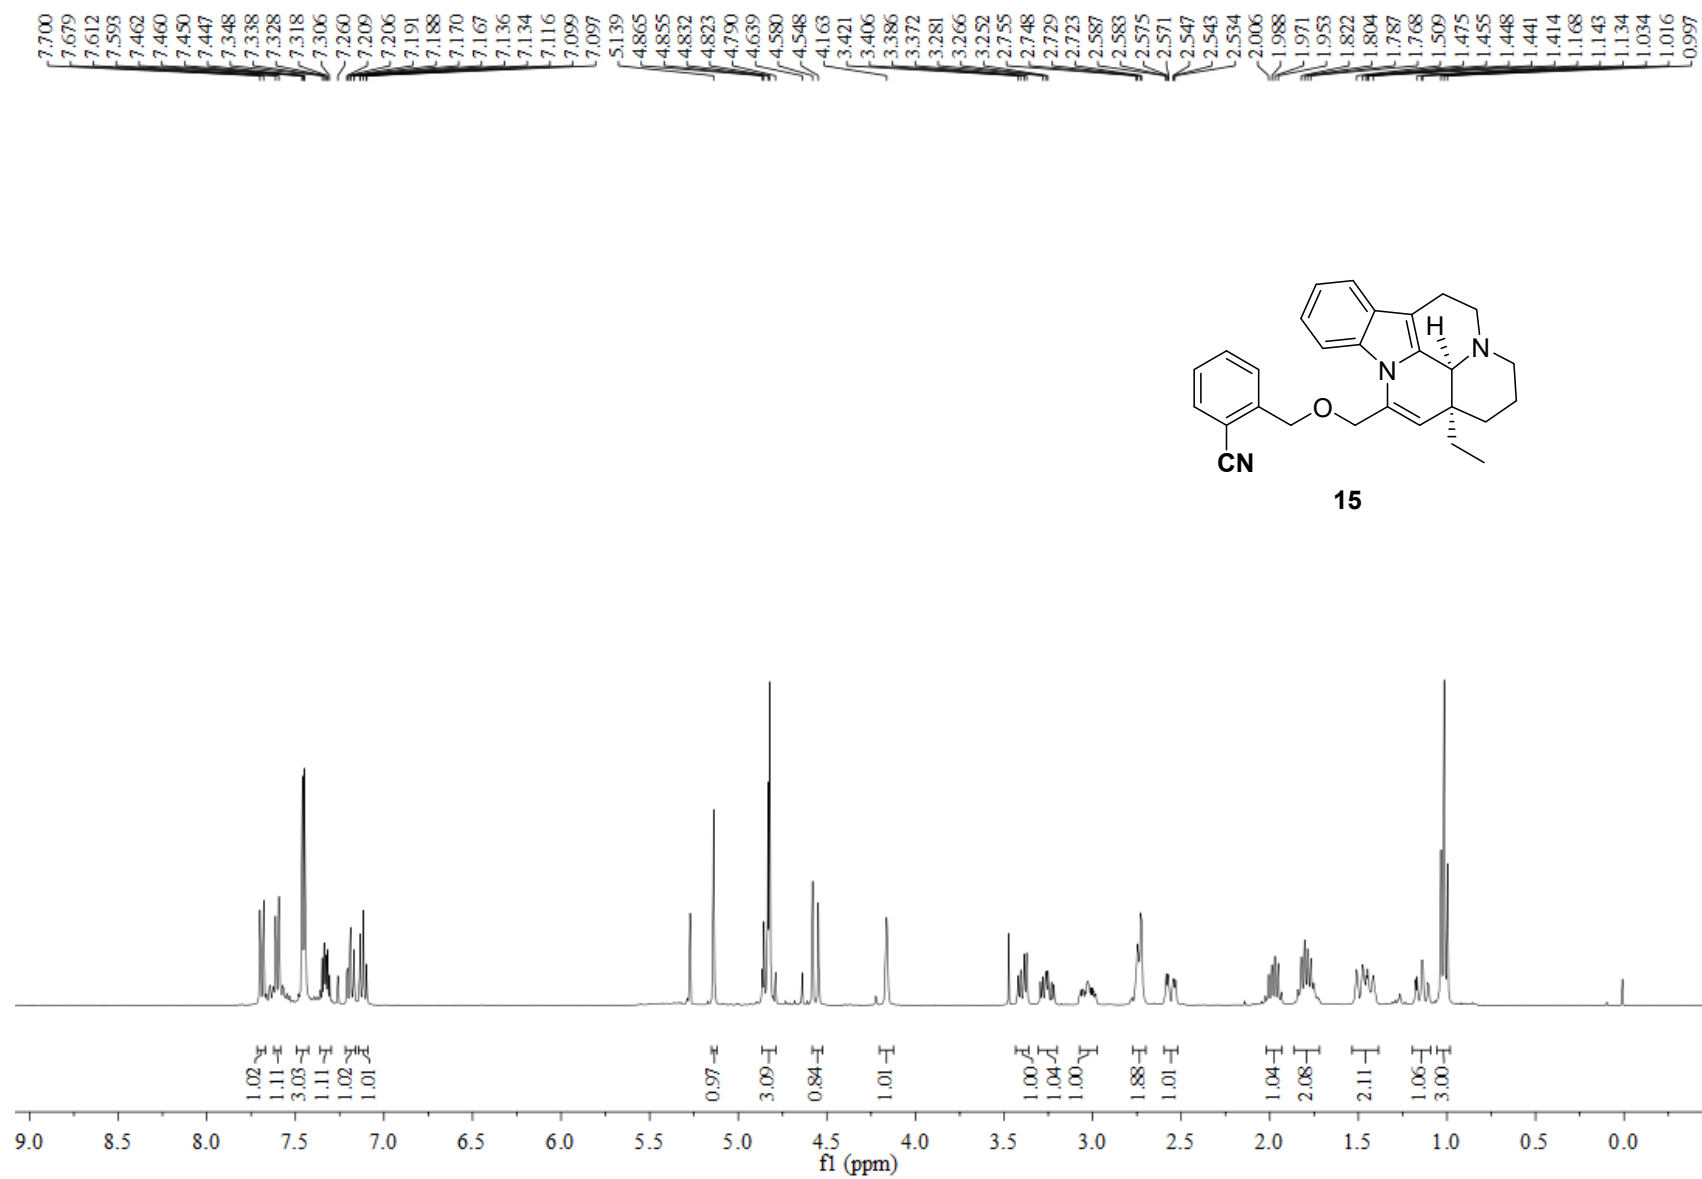

<sup>1</sup>H NMR of Compound **15** (400 MHz, CDCl<sub>3</sub>)

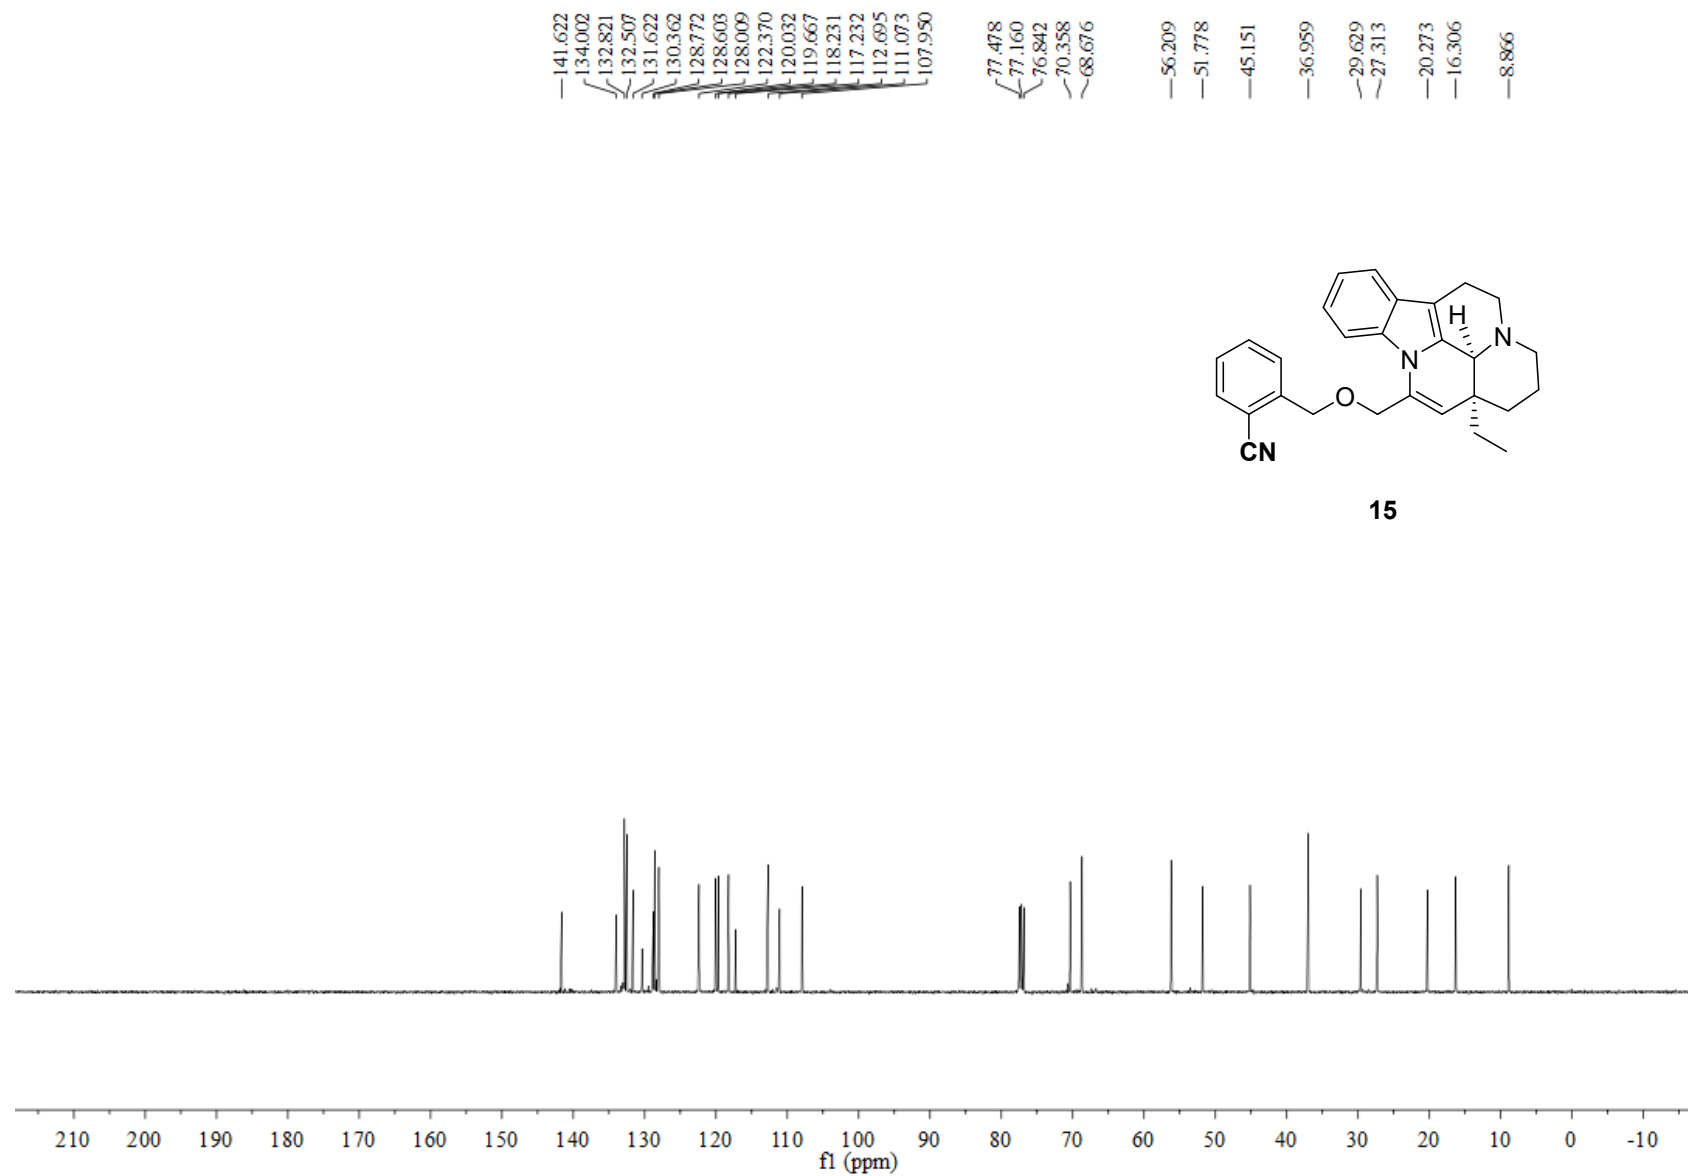

<sup>13</sup>C NMR of Compound **15** (100 MHz, CDCl<sub>3</sub>)

Item name: DB-60-8  
Item description:

Channel name: 1: Average Time 0.0831 min : TOF MS (50-1500) ESI+ : Centroided : Combined

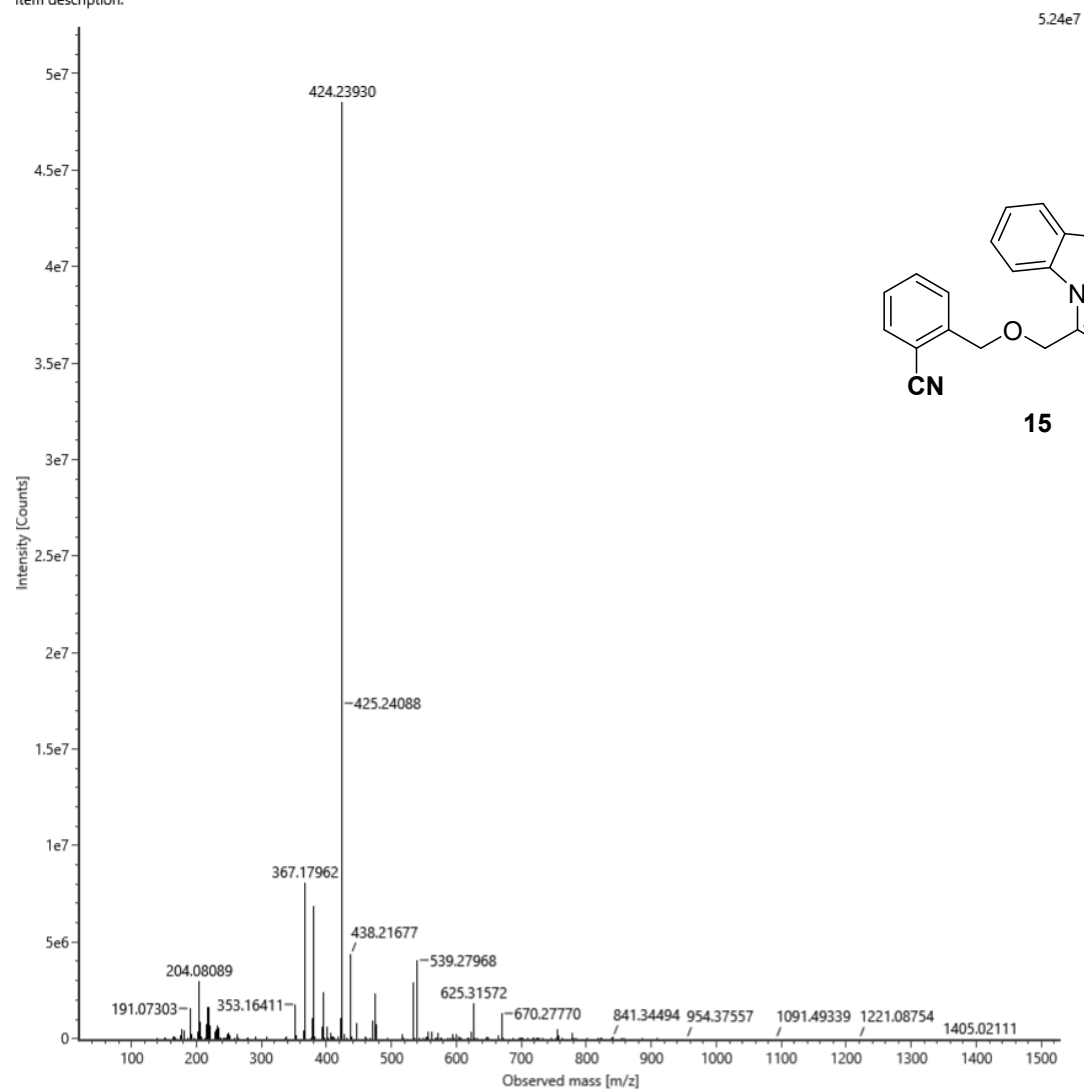

HRMS of Compound **15**

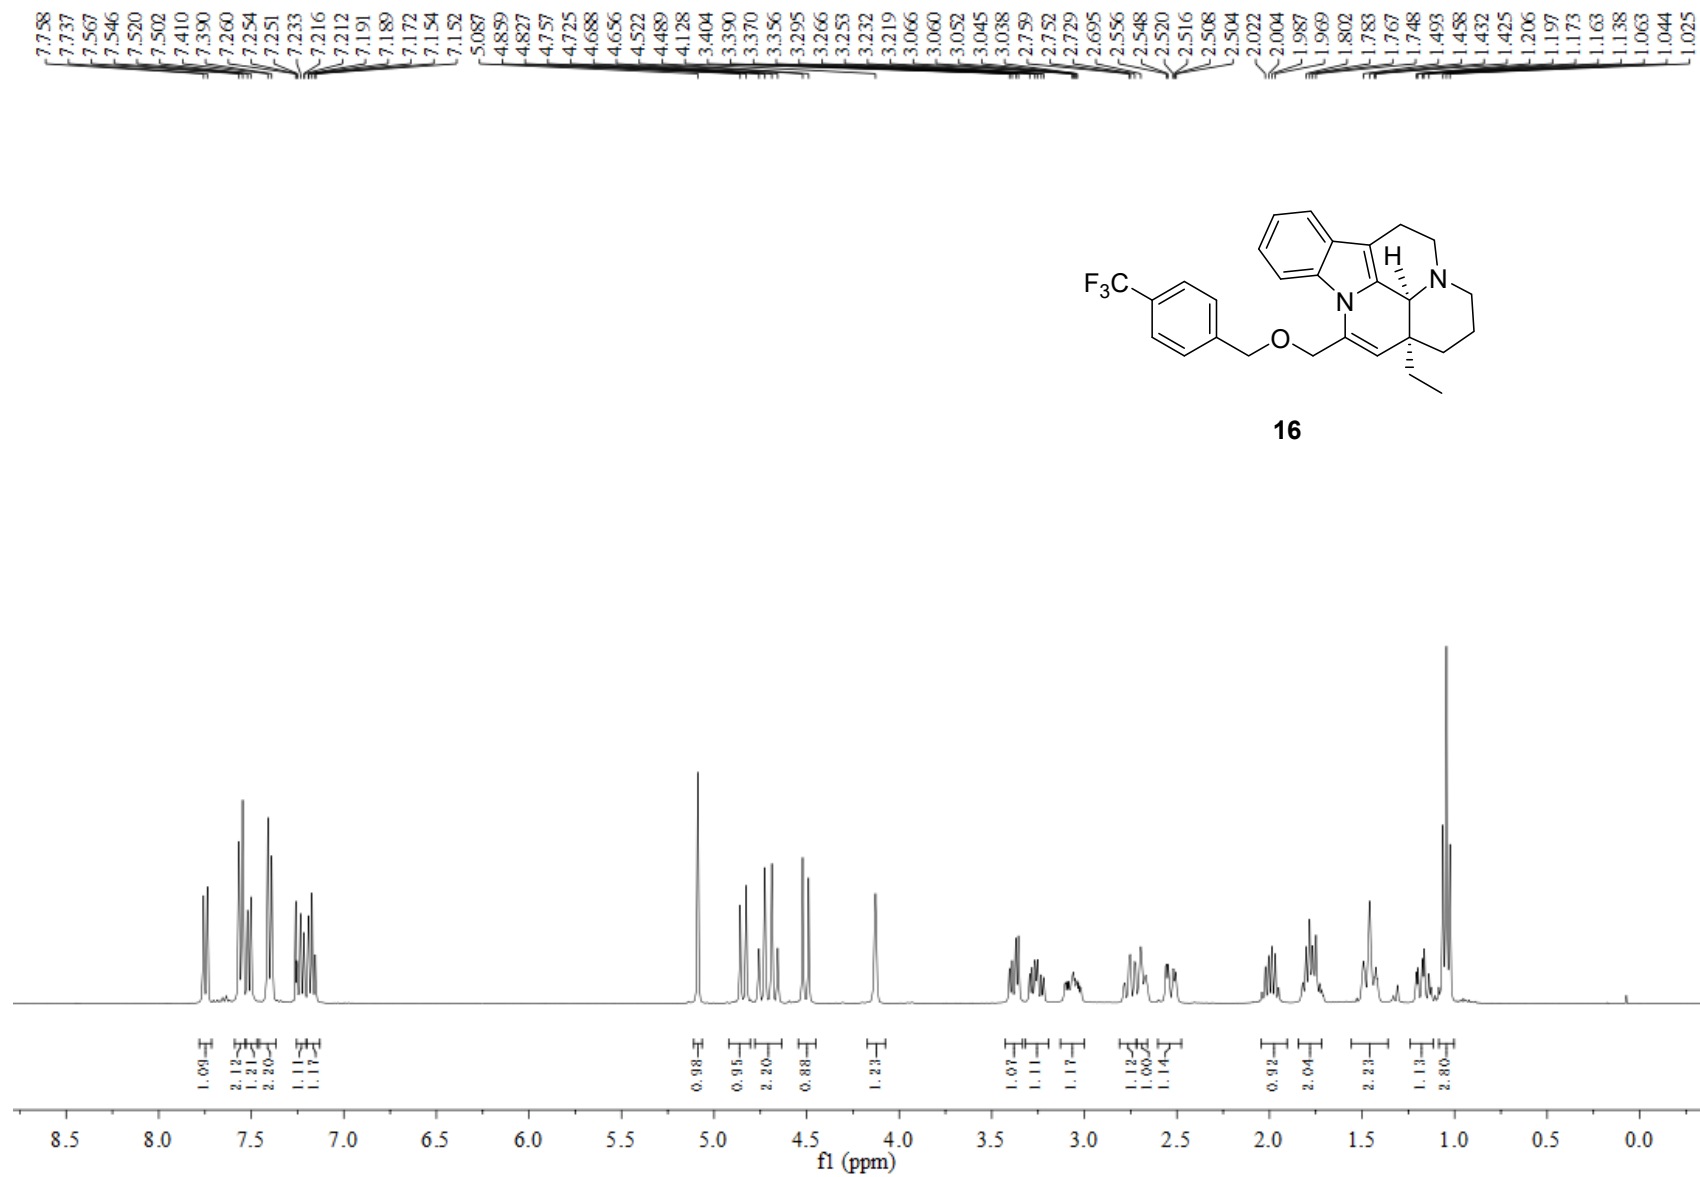

<sup>1</sup>H NMR of Compound **16**(400 MHz, CDCl<sub>3</sub>)

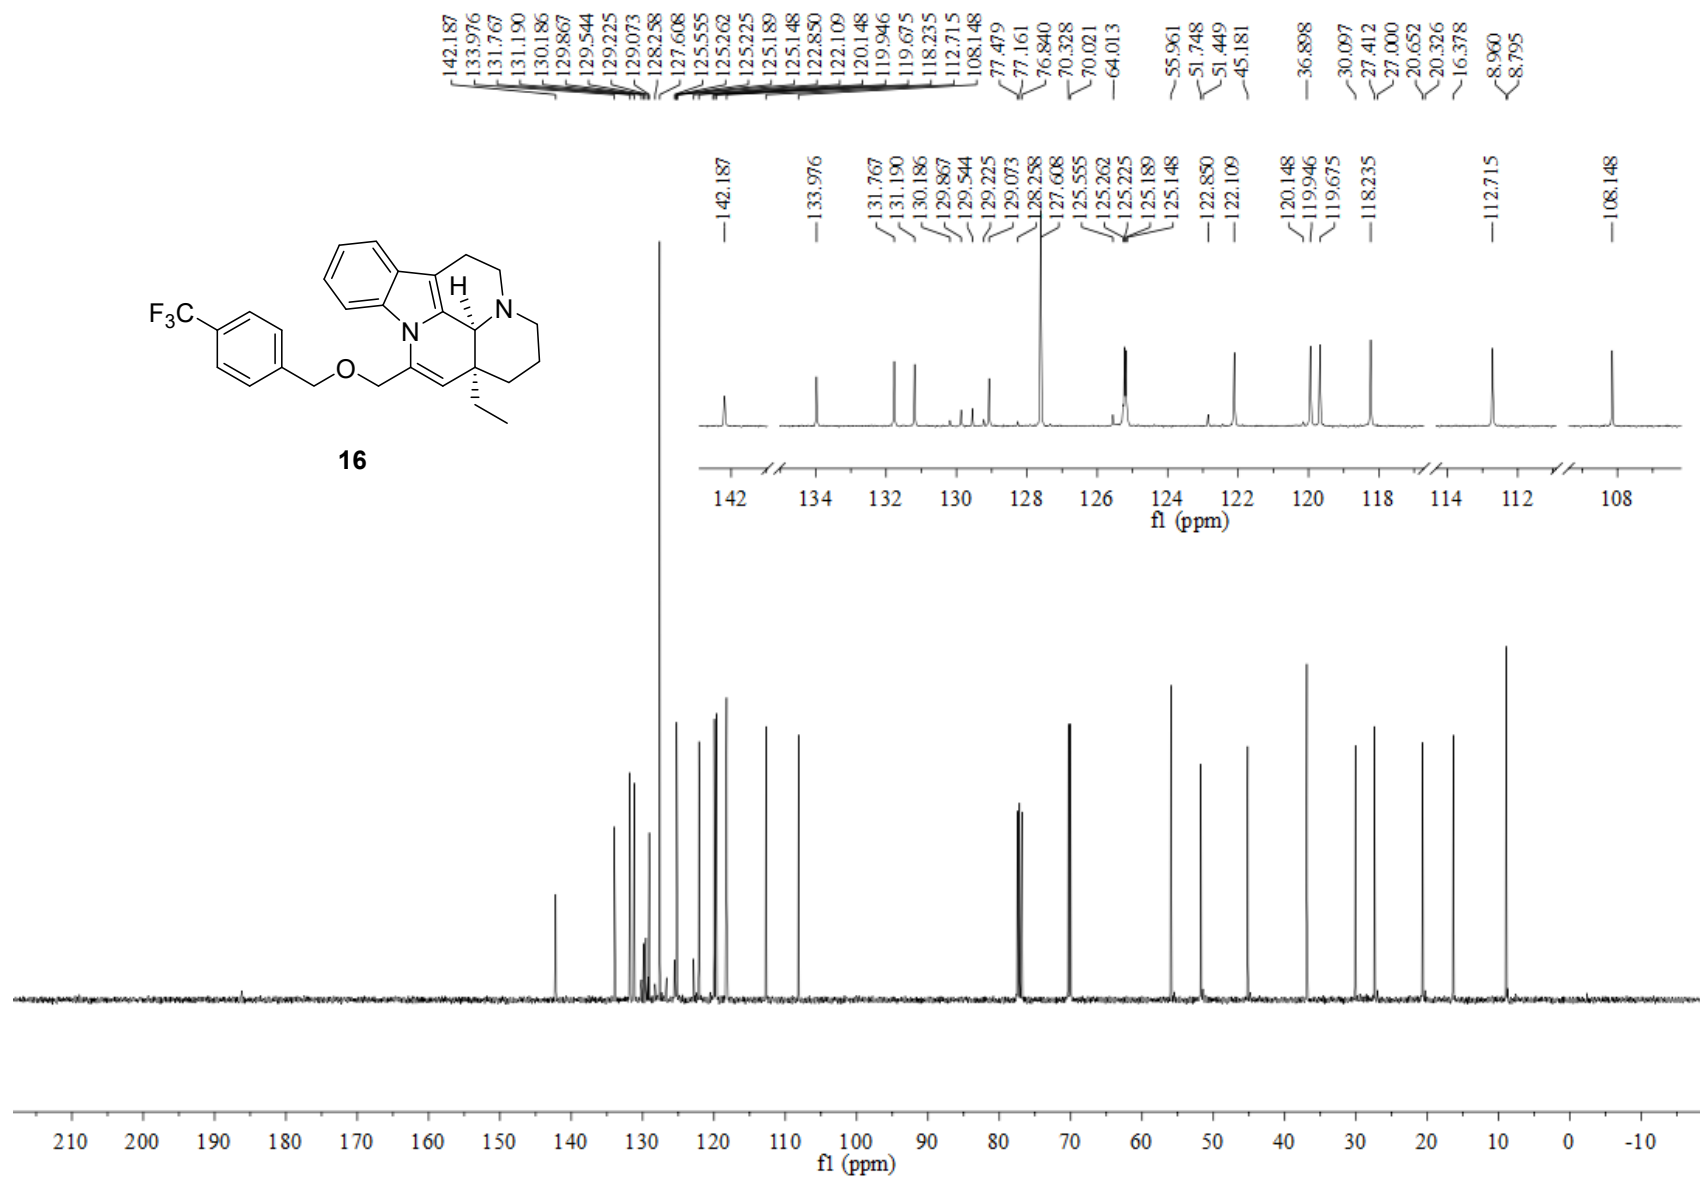



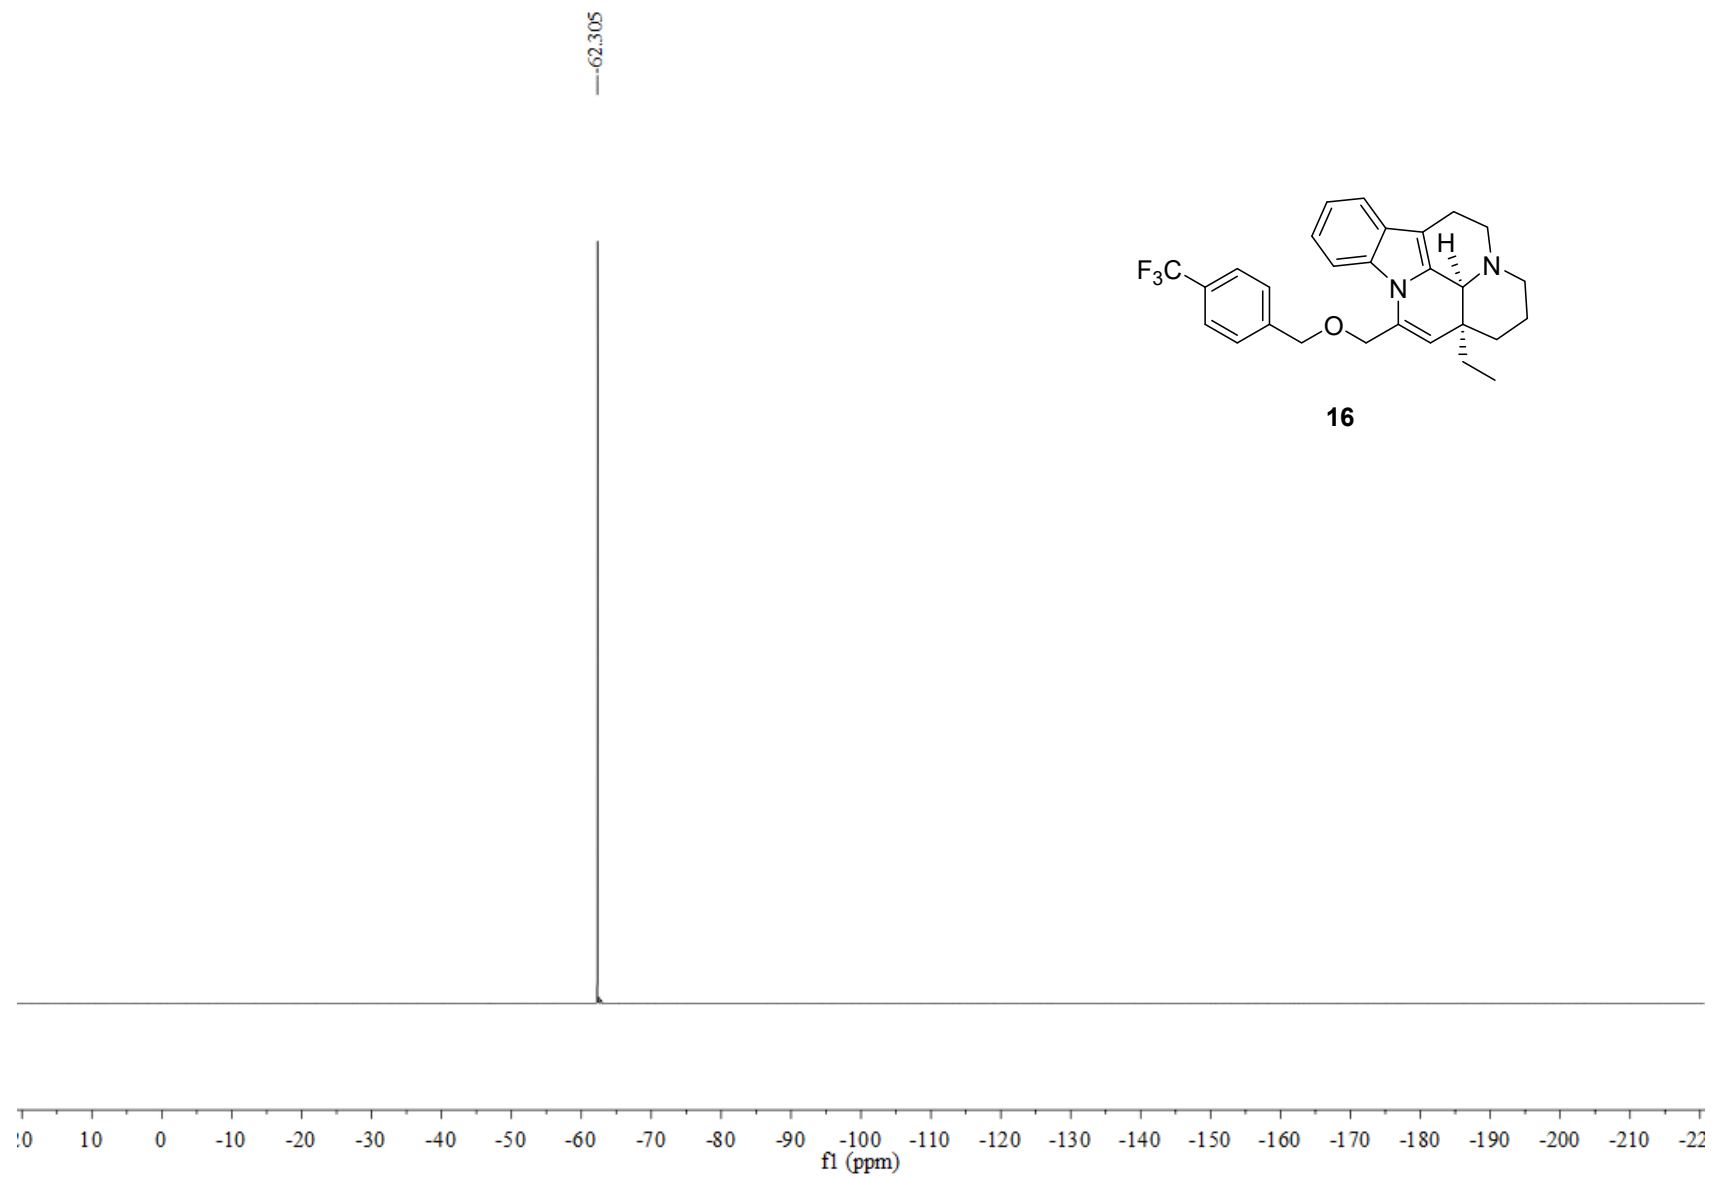

$^{19}\text{F}$  NMR of Compound **16** (377 MHz,  $\text{CDCl}_3$ )

Item name: DB-60-12  
Item description:

Channel name: 1: Average Time 0.0831 min : TOF MS (50-1500) ESI+ : Centroided : Combined

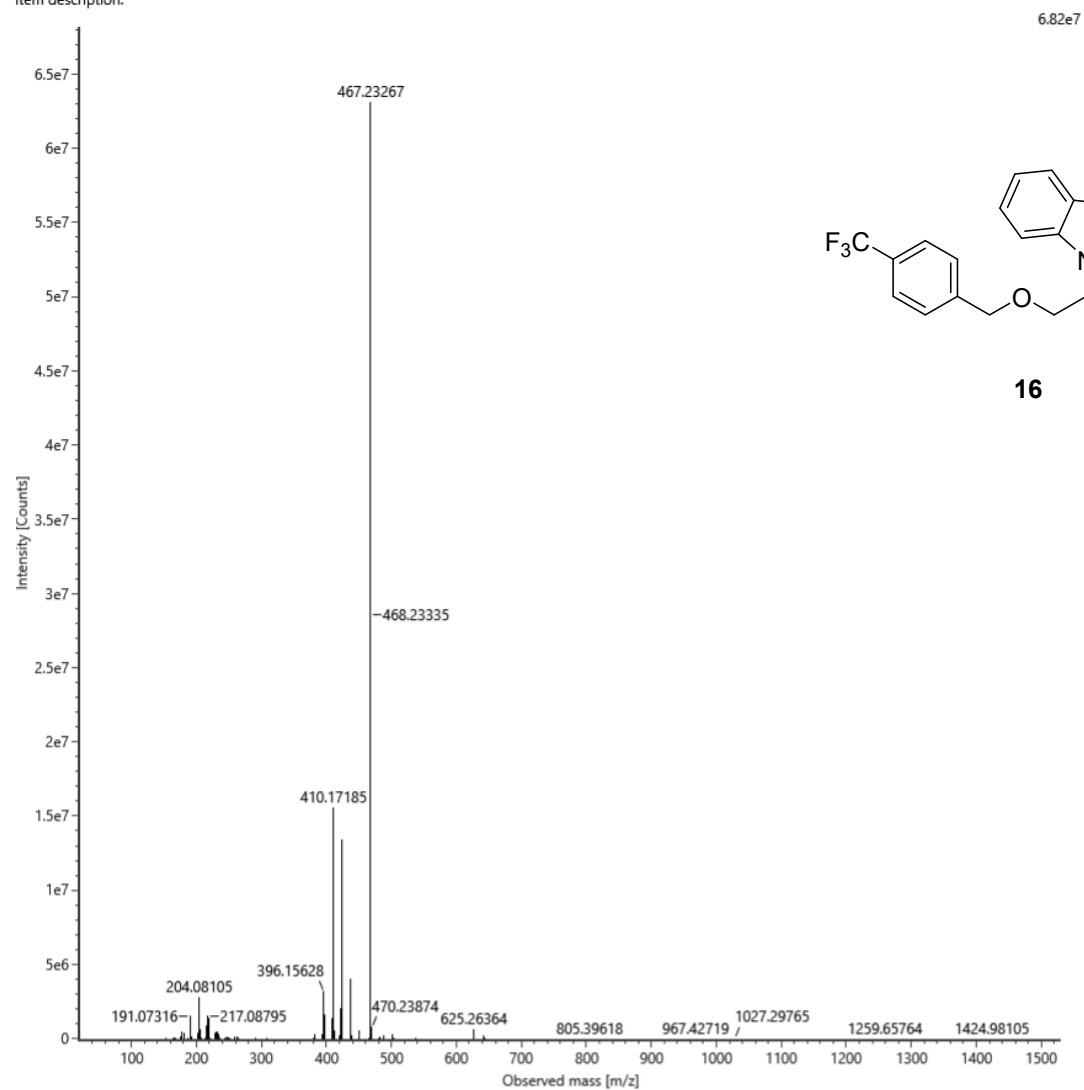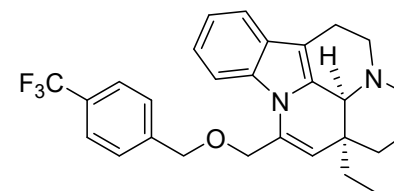

**16**

HRMS of Compound **16**

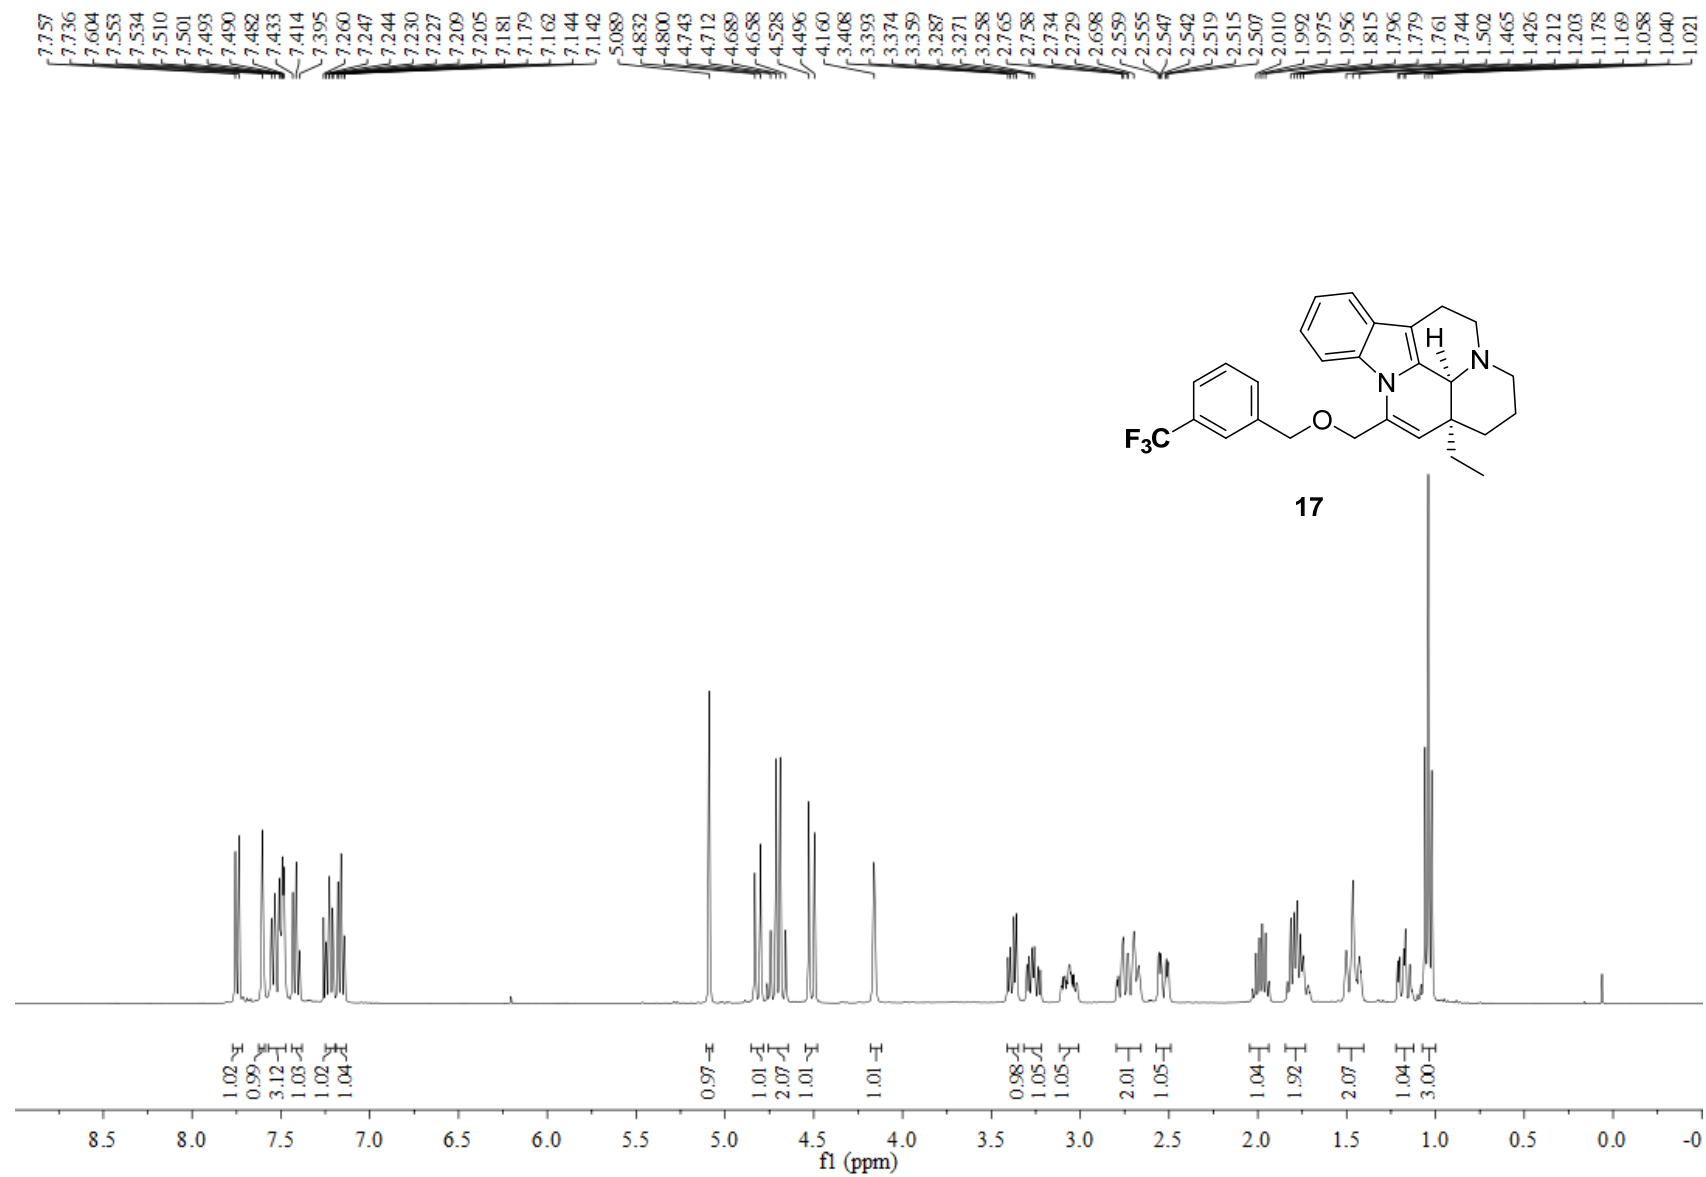

<sup>1</sup>H NMR of Compound **17** (400 MHz, CDCl<sub>3</sub>)

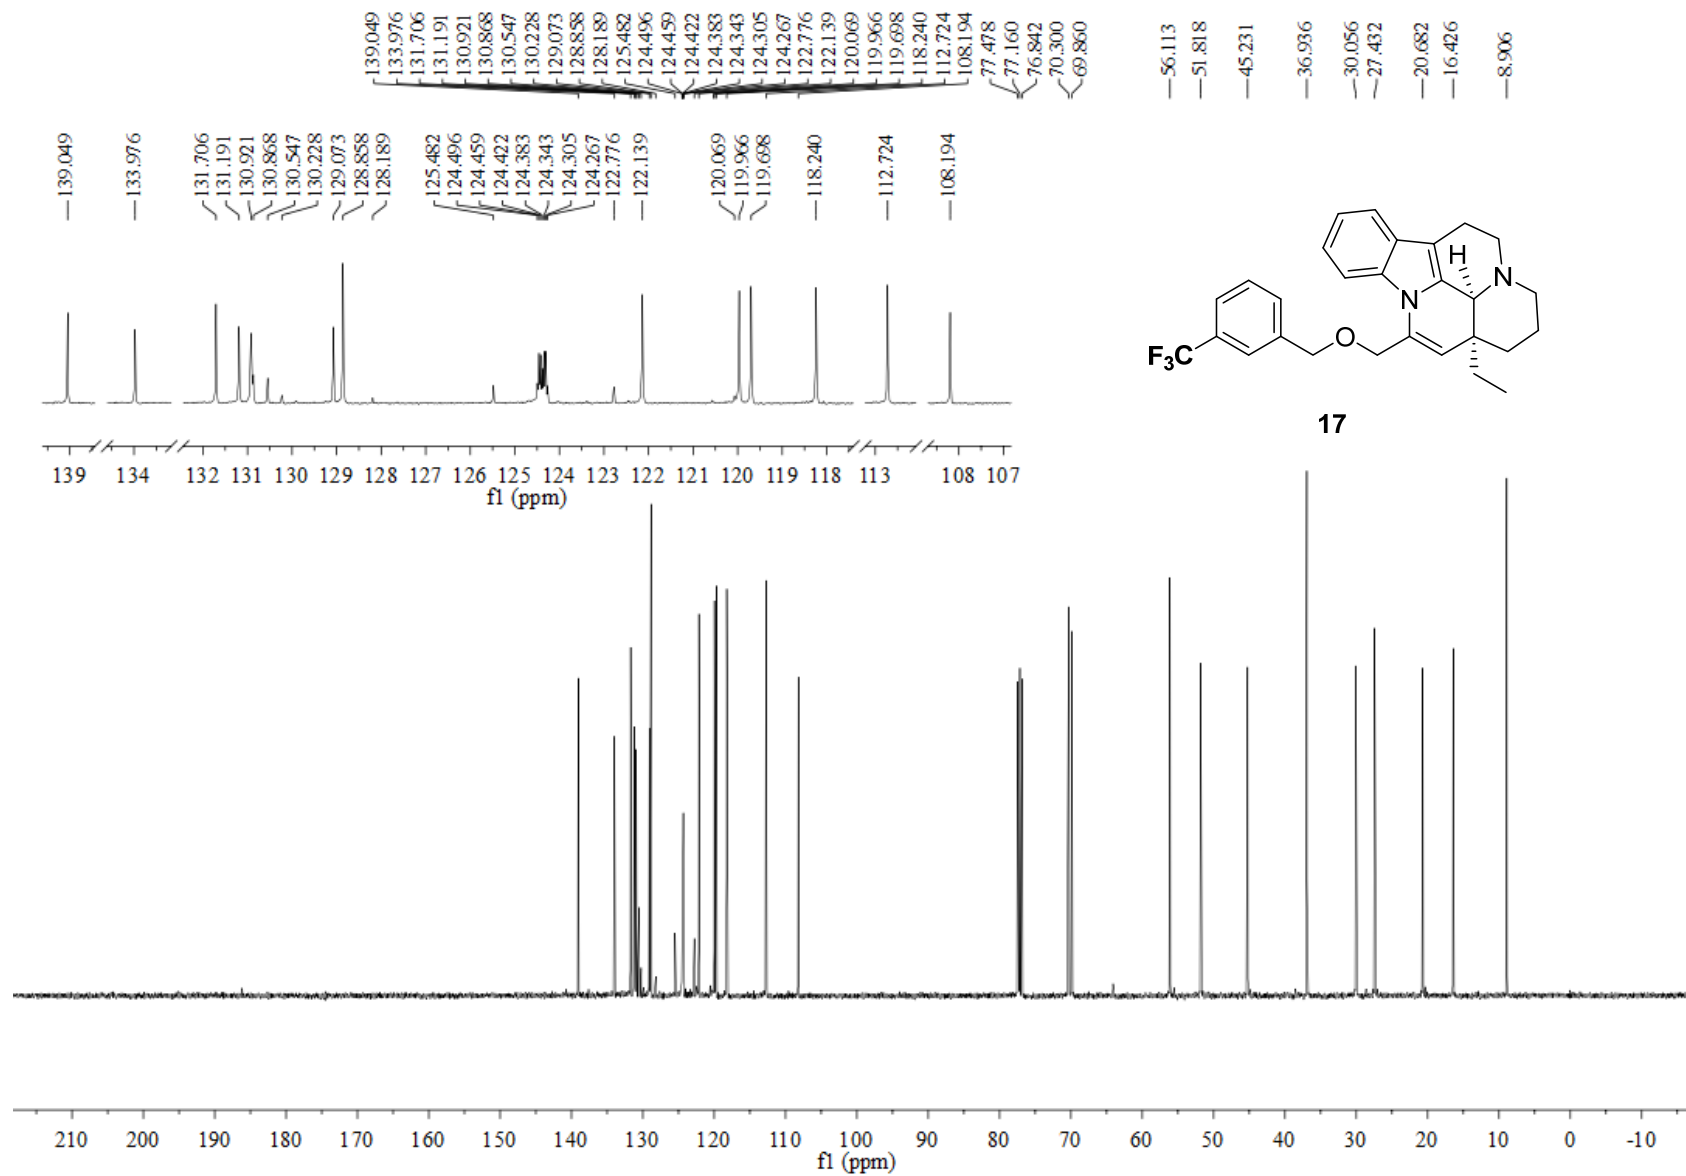

<sup>13</sup>C NMR of Compound **17** (100 MHz, CDCl<sub>3</sub>)

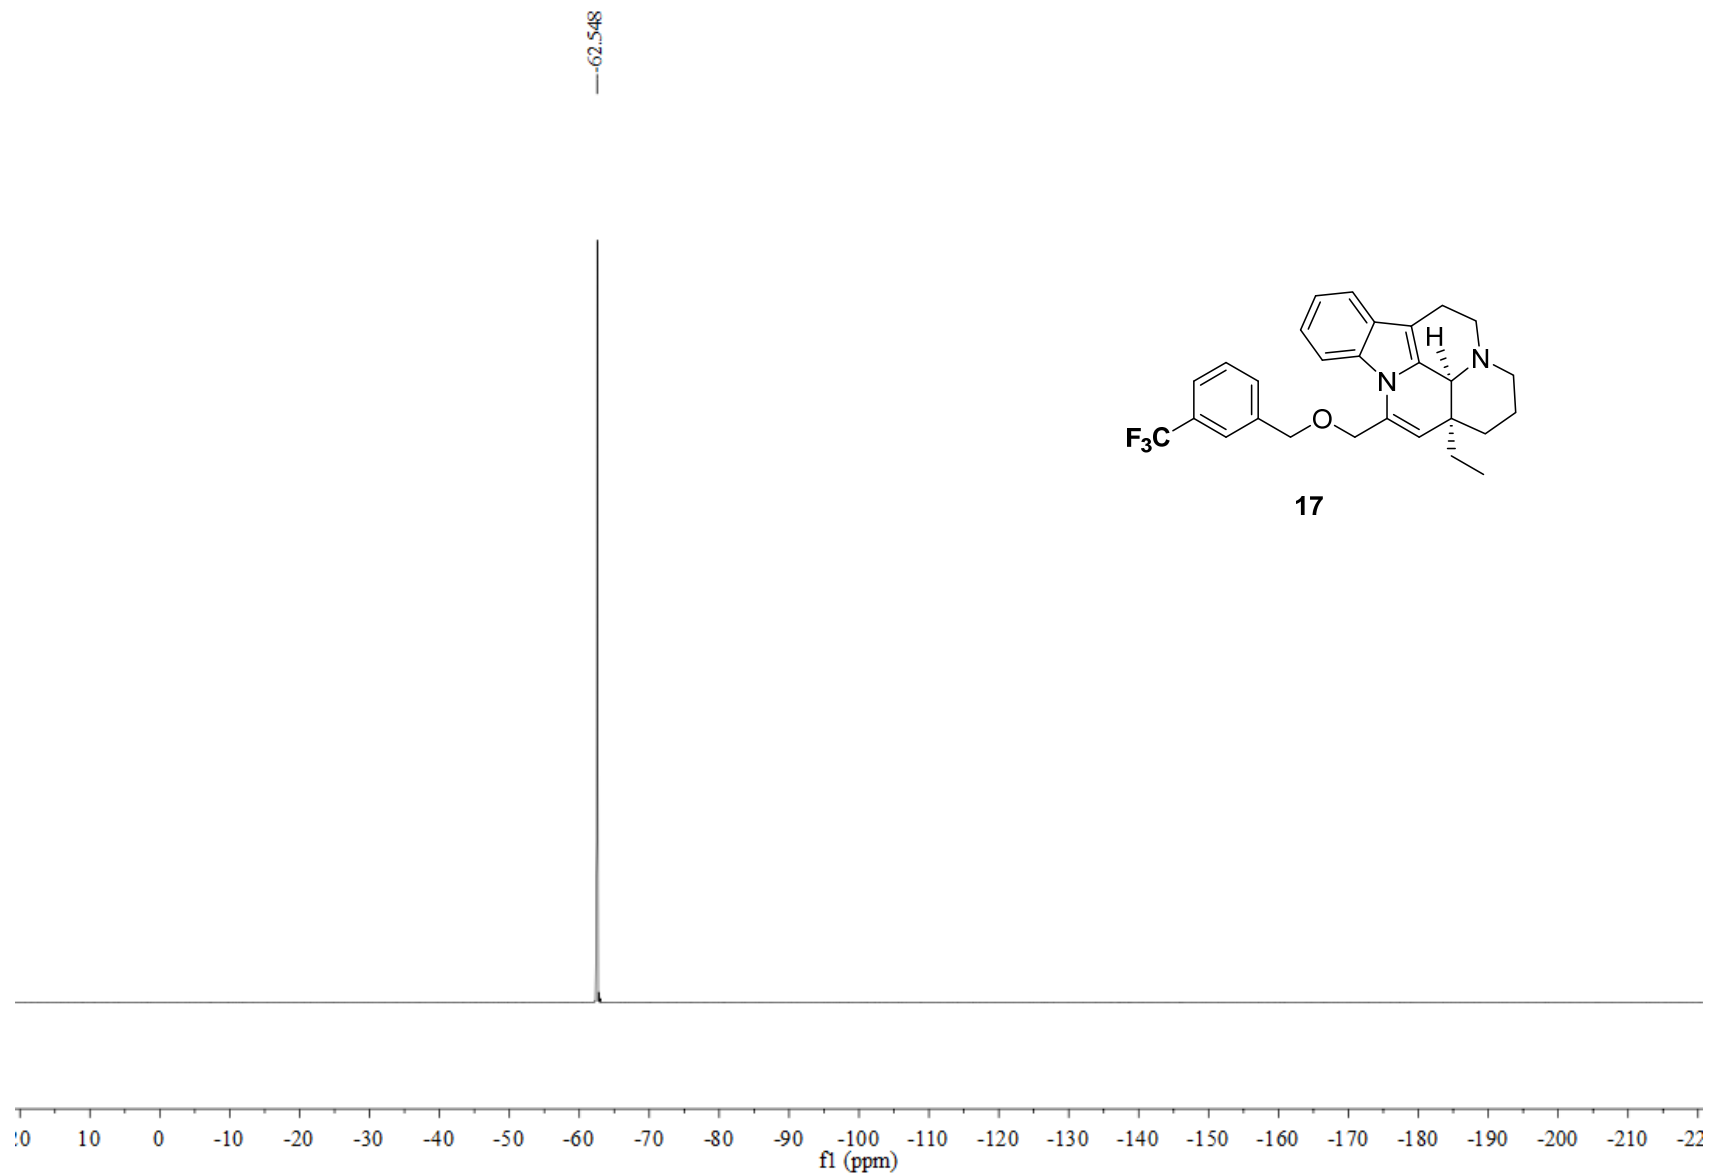

$^{19}\text{F}$  NMR of Compound **17** (377 MHz,  $\text{CDCl}_3$ )

Item name: DB-60-12  
Item description:

Channel name: 1: Average Time 0.0917 min : TOF MS (50-1500) ESI+ : Centroided : Combined

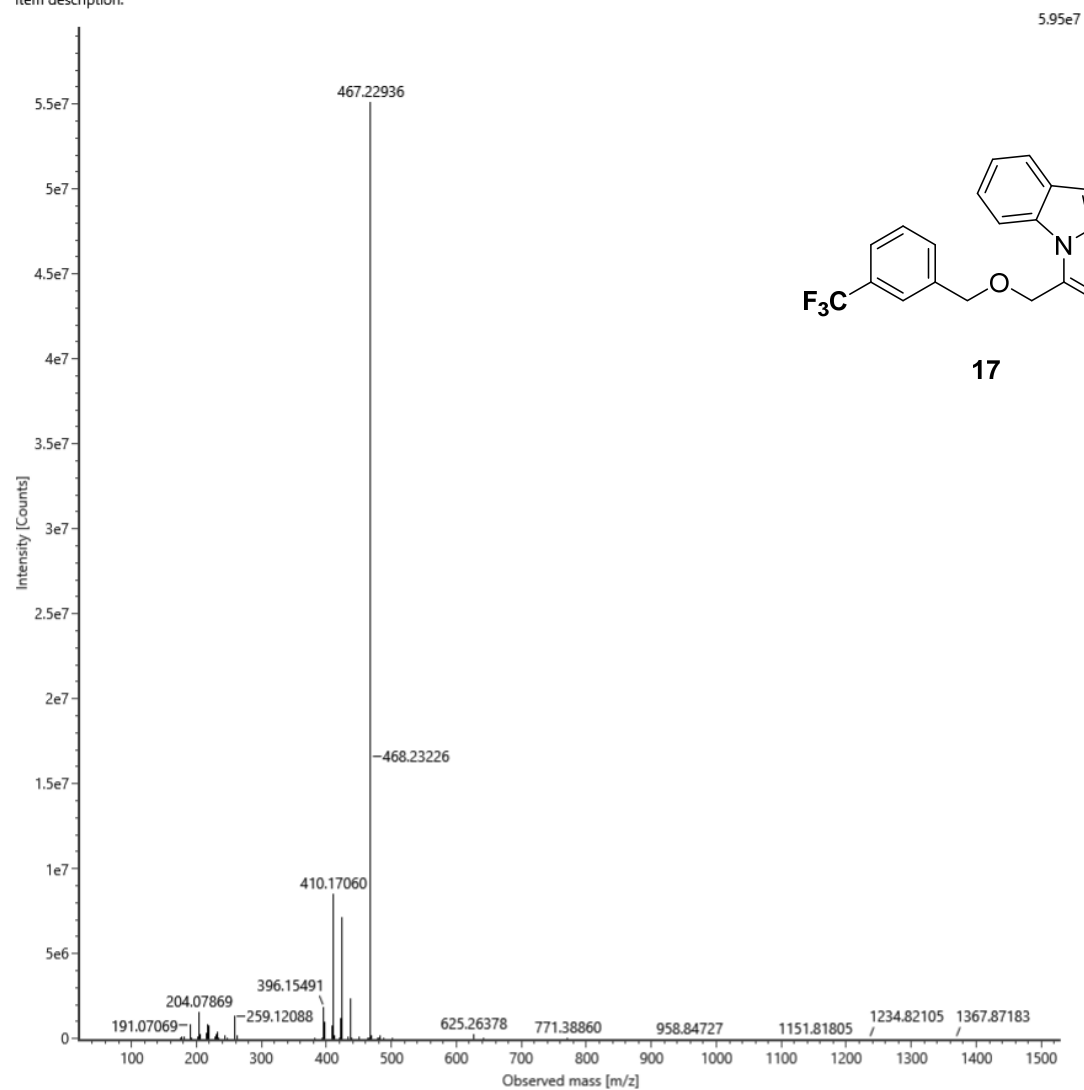

HRMS of Compound **17**

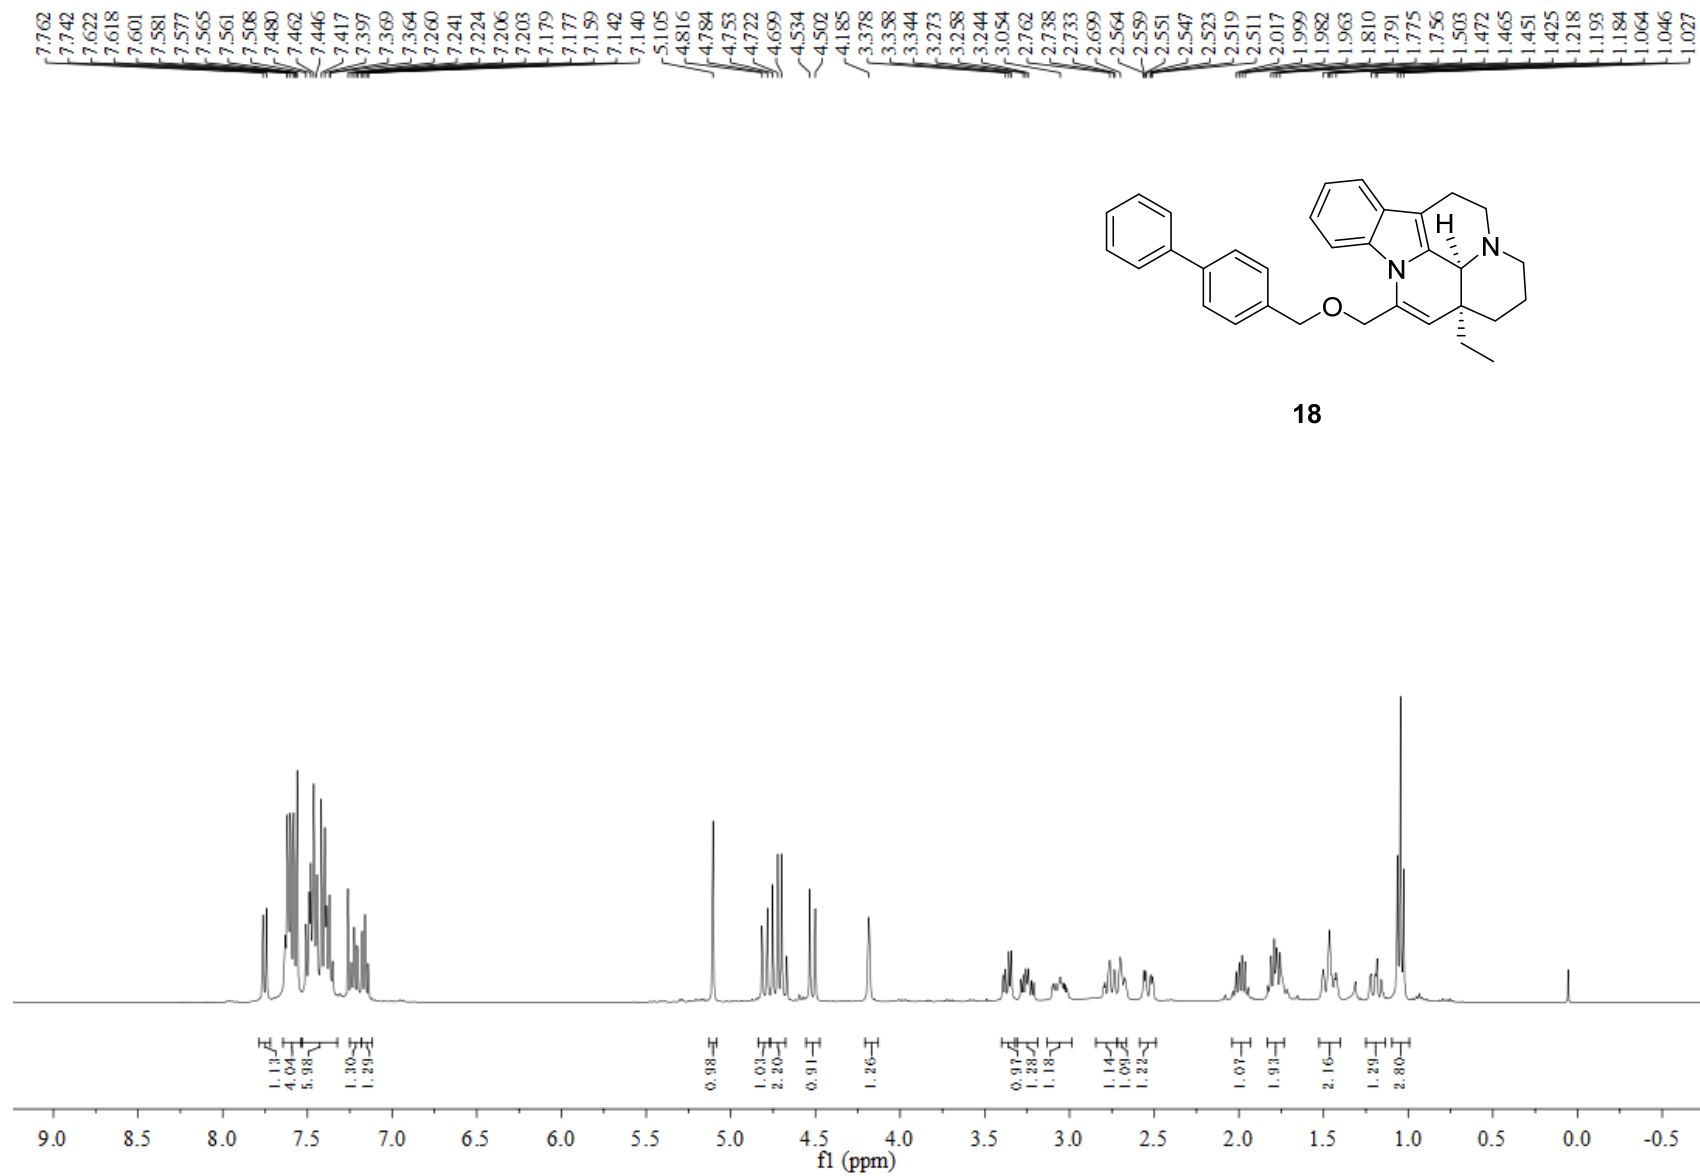

<sup>1</sup>H NMR of Compound 18 (400 MHz, CDCl<sub>3</sub>)

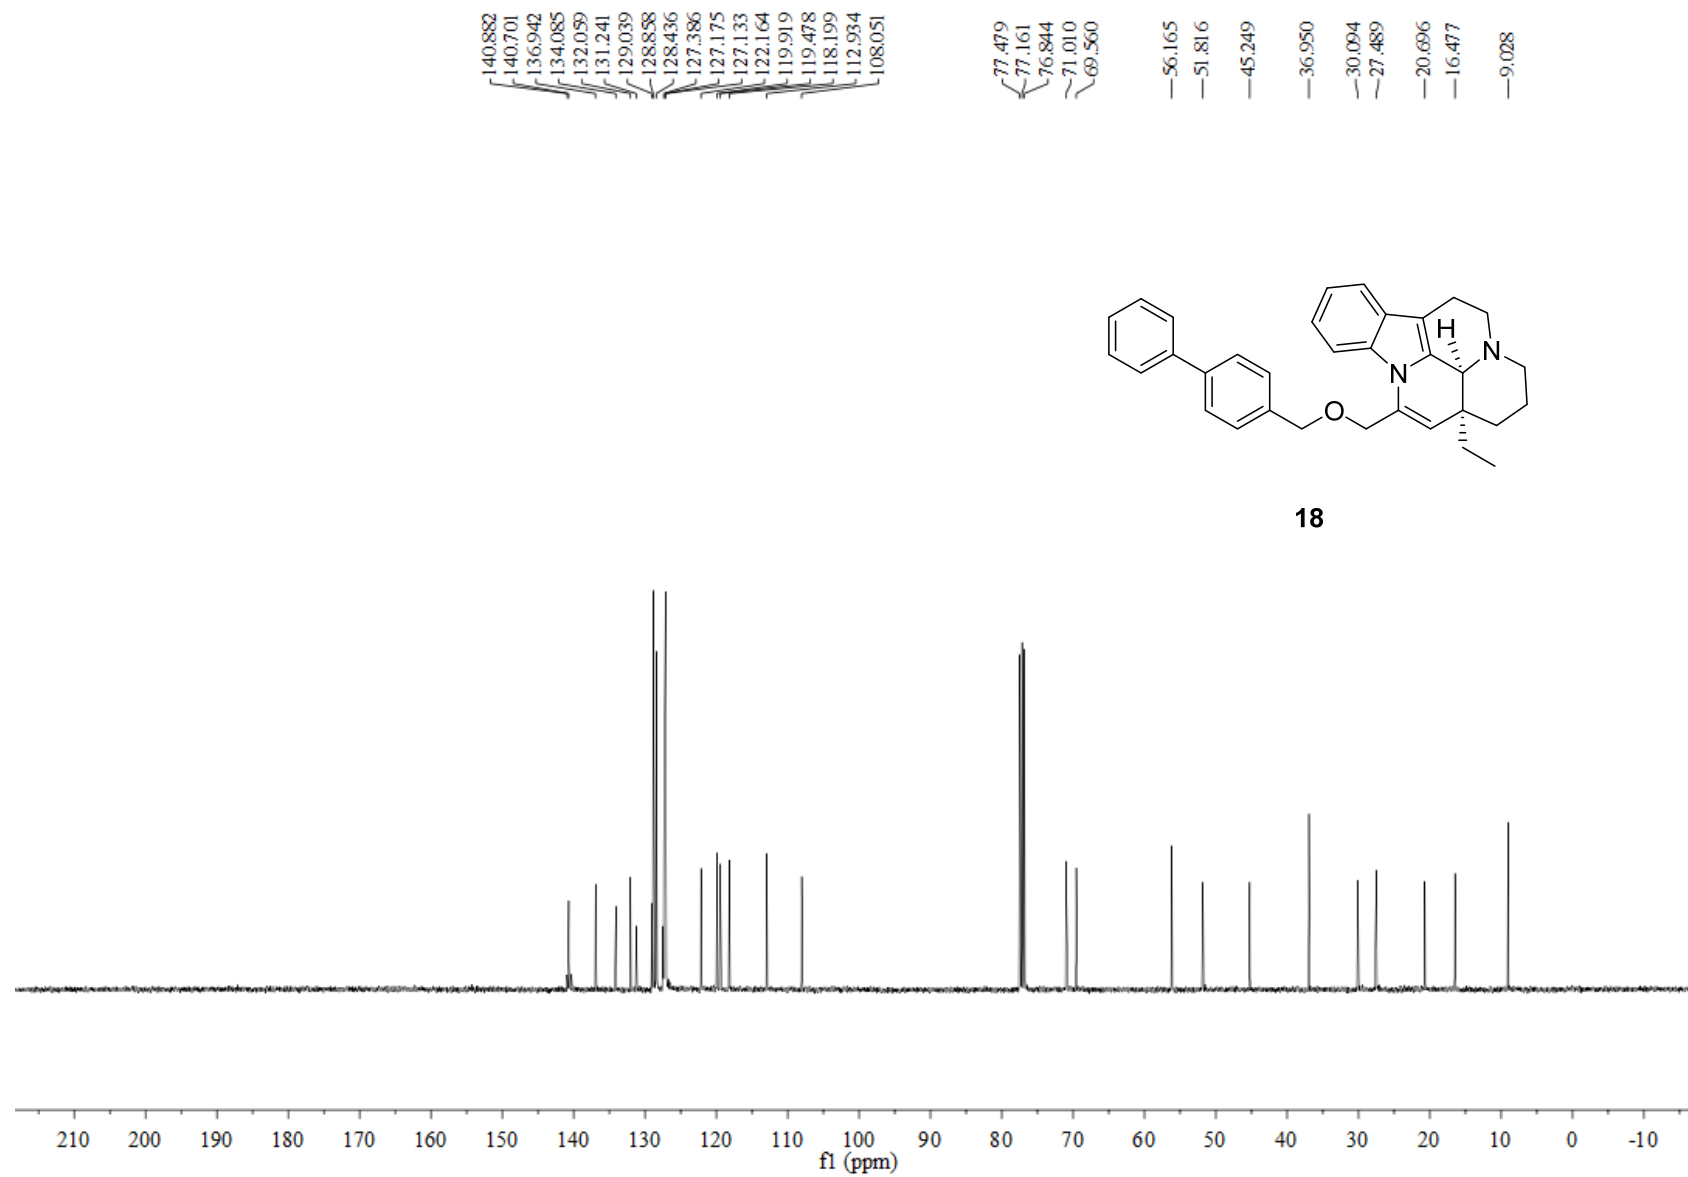

$^{13}\text{C}$  NMR of Compound **18** (100 MHz,  $\text{CDCl}_3$ )



Item name: DB-60-7  
Item description:

Channel name: 1: Average Time 0.0788 min : TOF MS (50-1500) ESI+ : Centroided : Combined

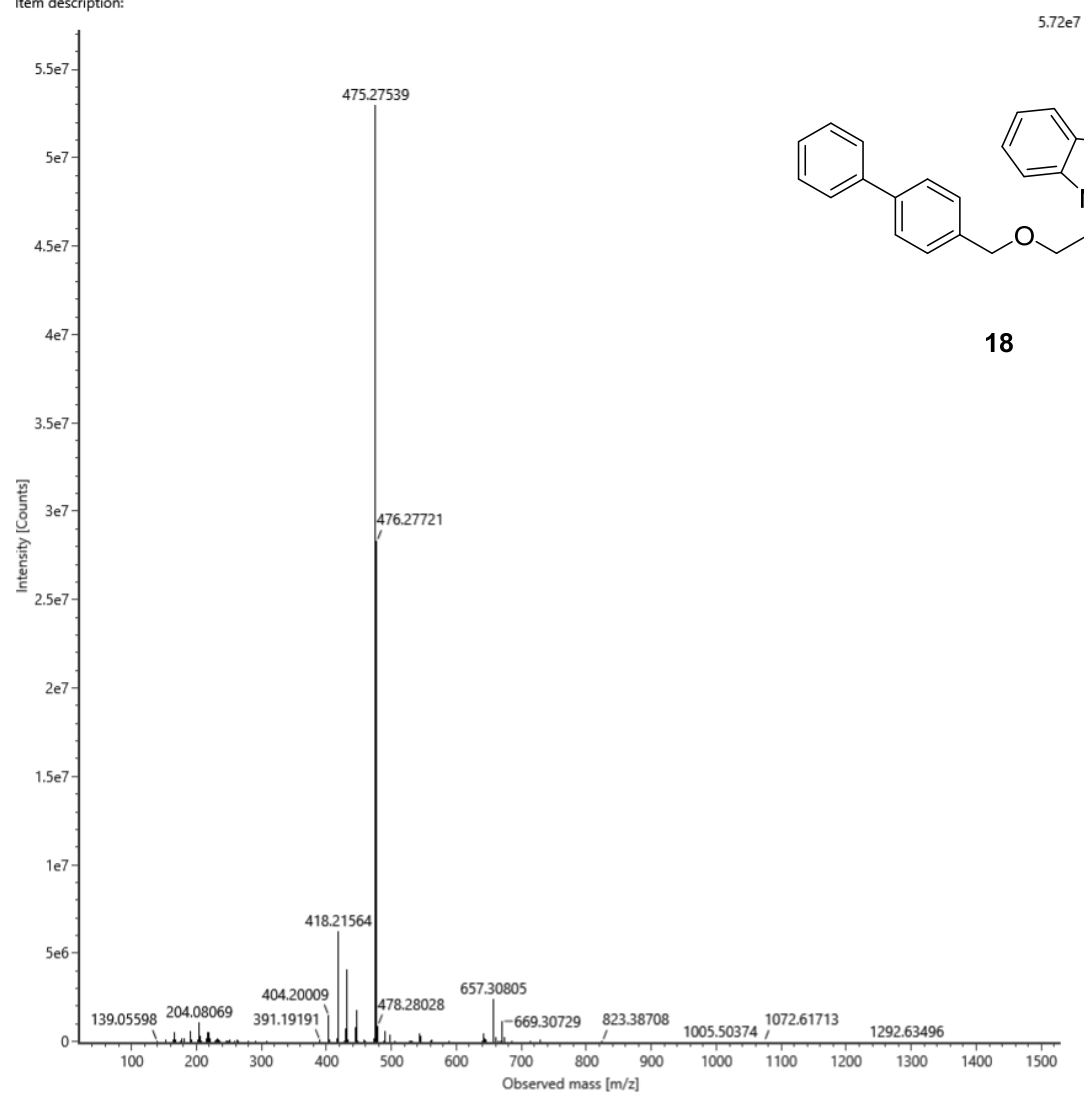

HRMS of Compound **18**

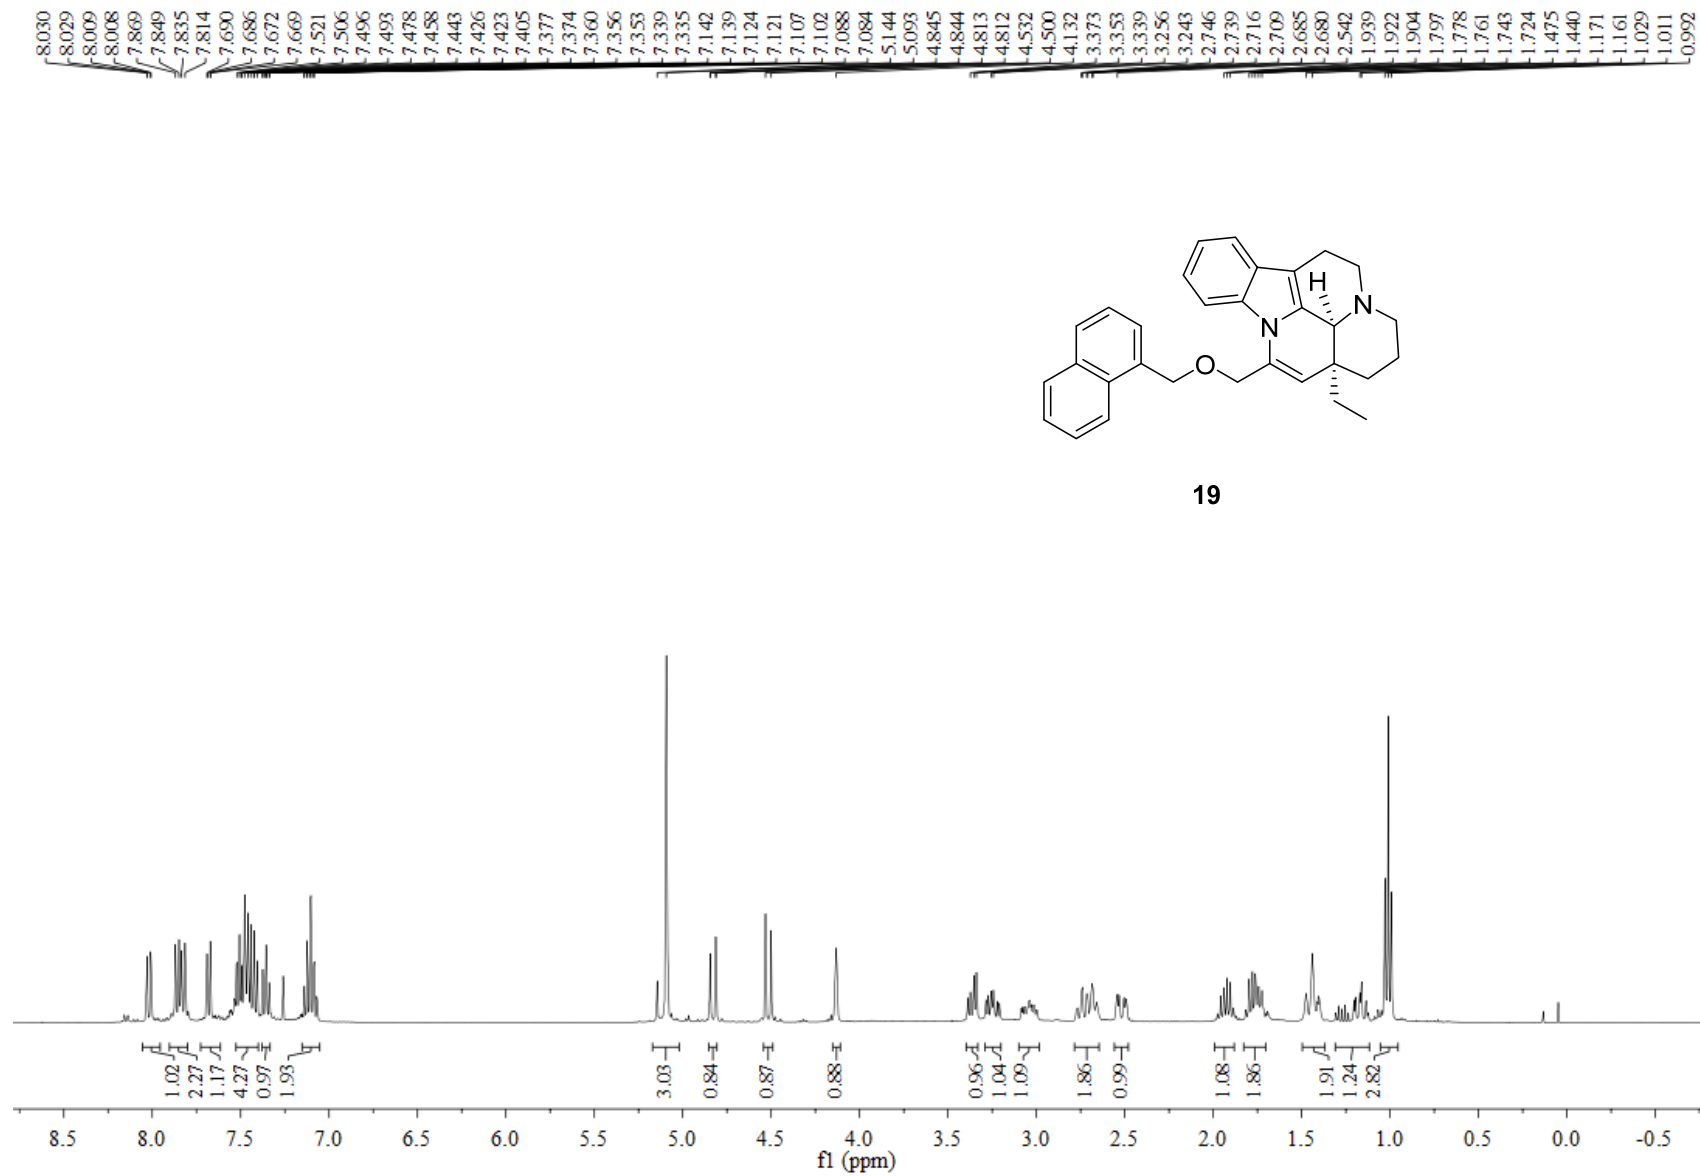

<sup>1</sup>H NMR of Compound 19 (400 MHz, CDCl<sub>3</sub>)

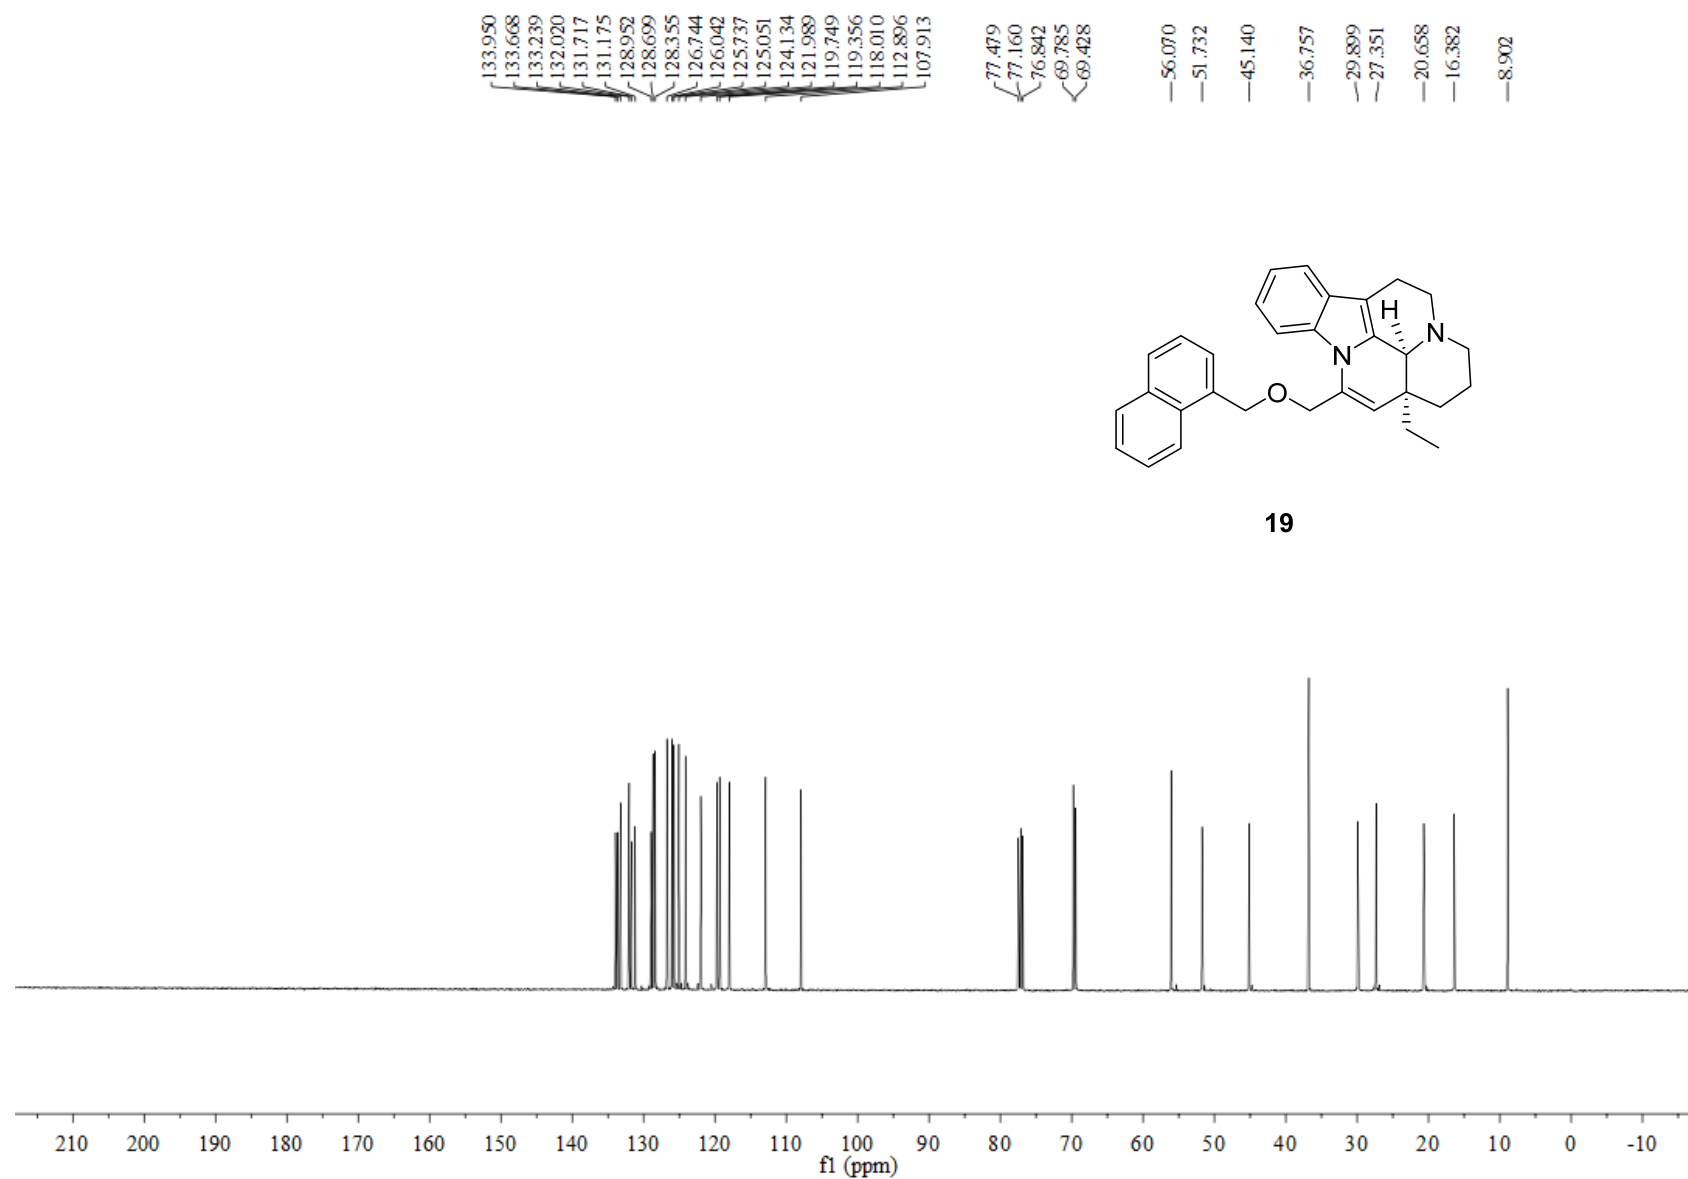

<sup>13</sup>C NMR of Compound **19** (100 MHz, CDCl<sub>3</sub>)

Item name: DA-111  
Item description:

Channel name: 1: Average Time 0.0788 min : TOF MS (50-1500) ESI+ : Centroided : Combined

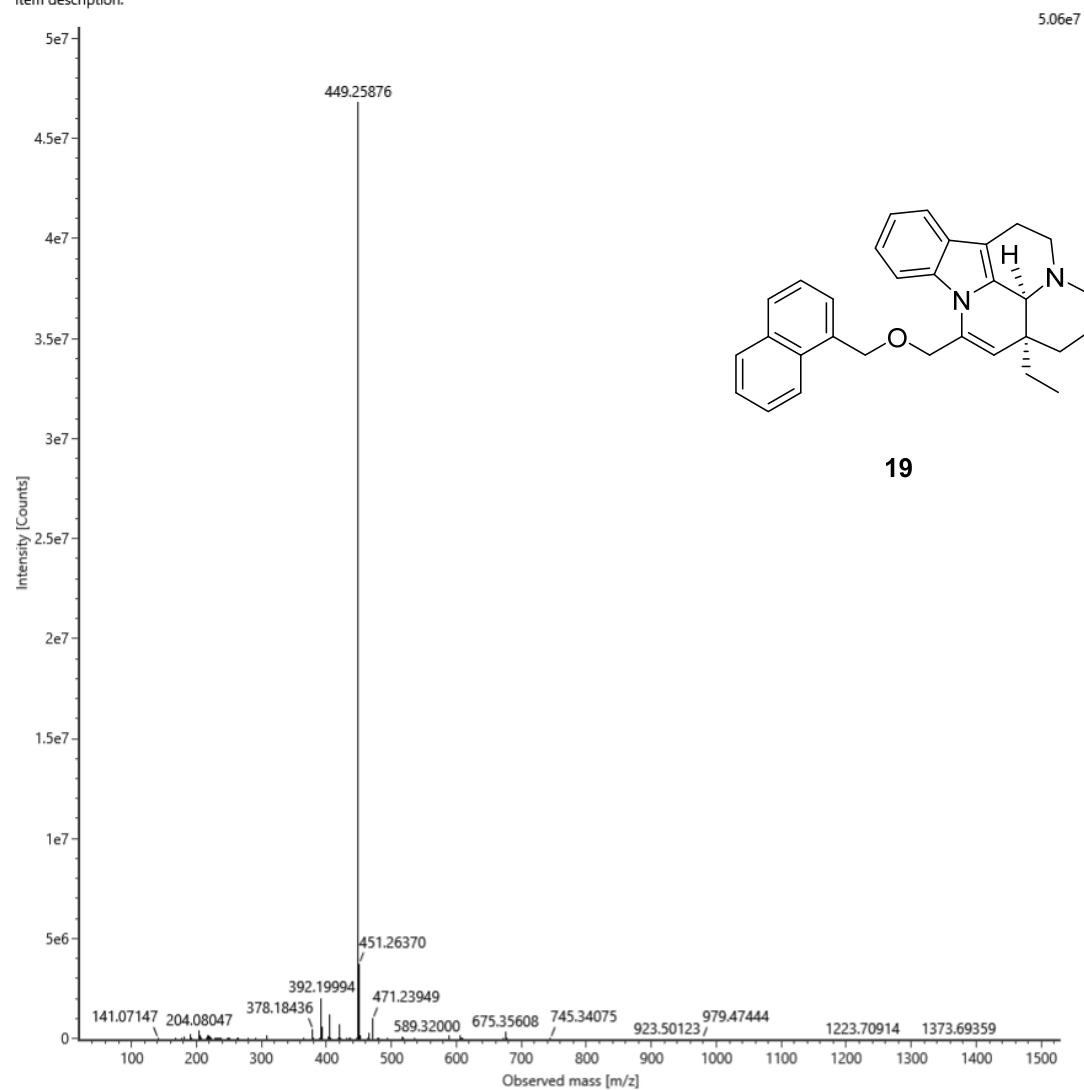

HRMS of Compound **19**

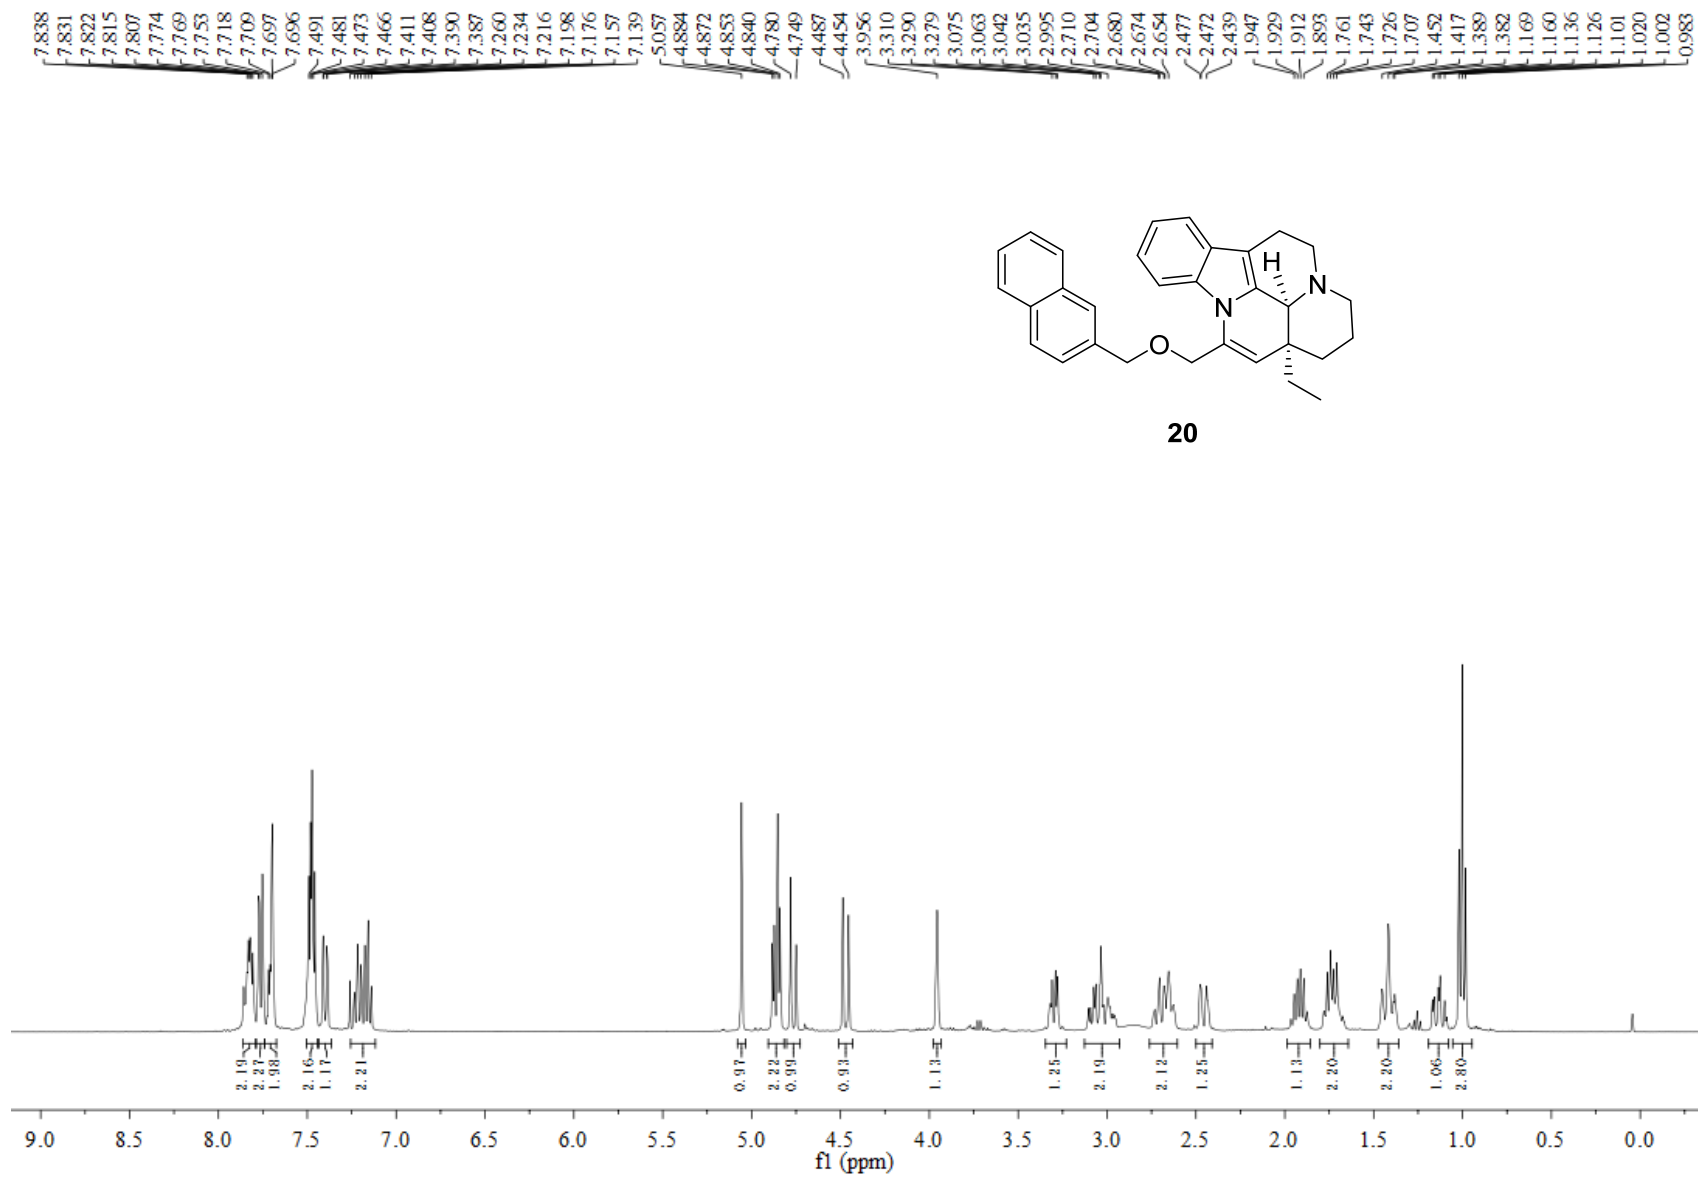

<sup>1</sup>H NMR of Compound **20** (400 MHz, CDCl<sub>3</sub>)

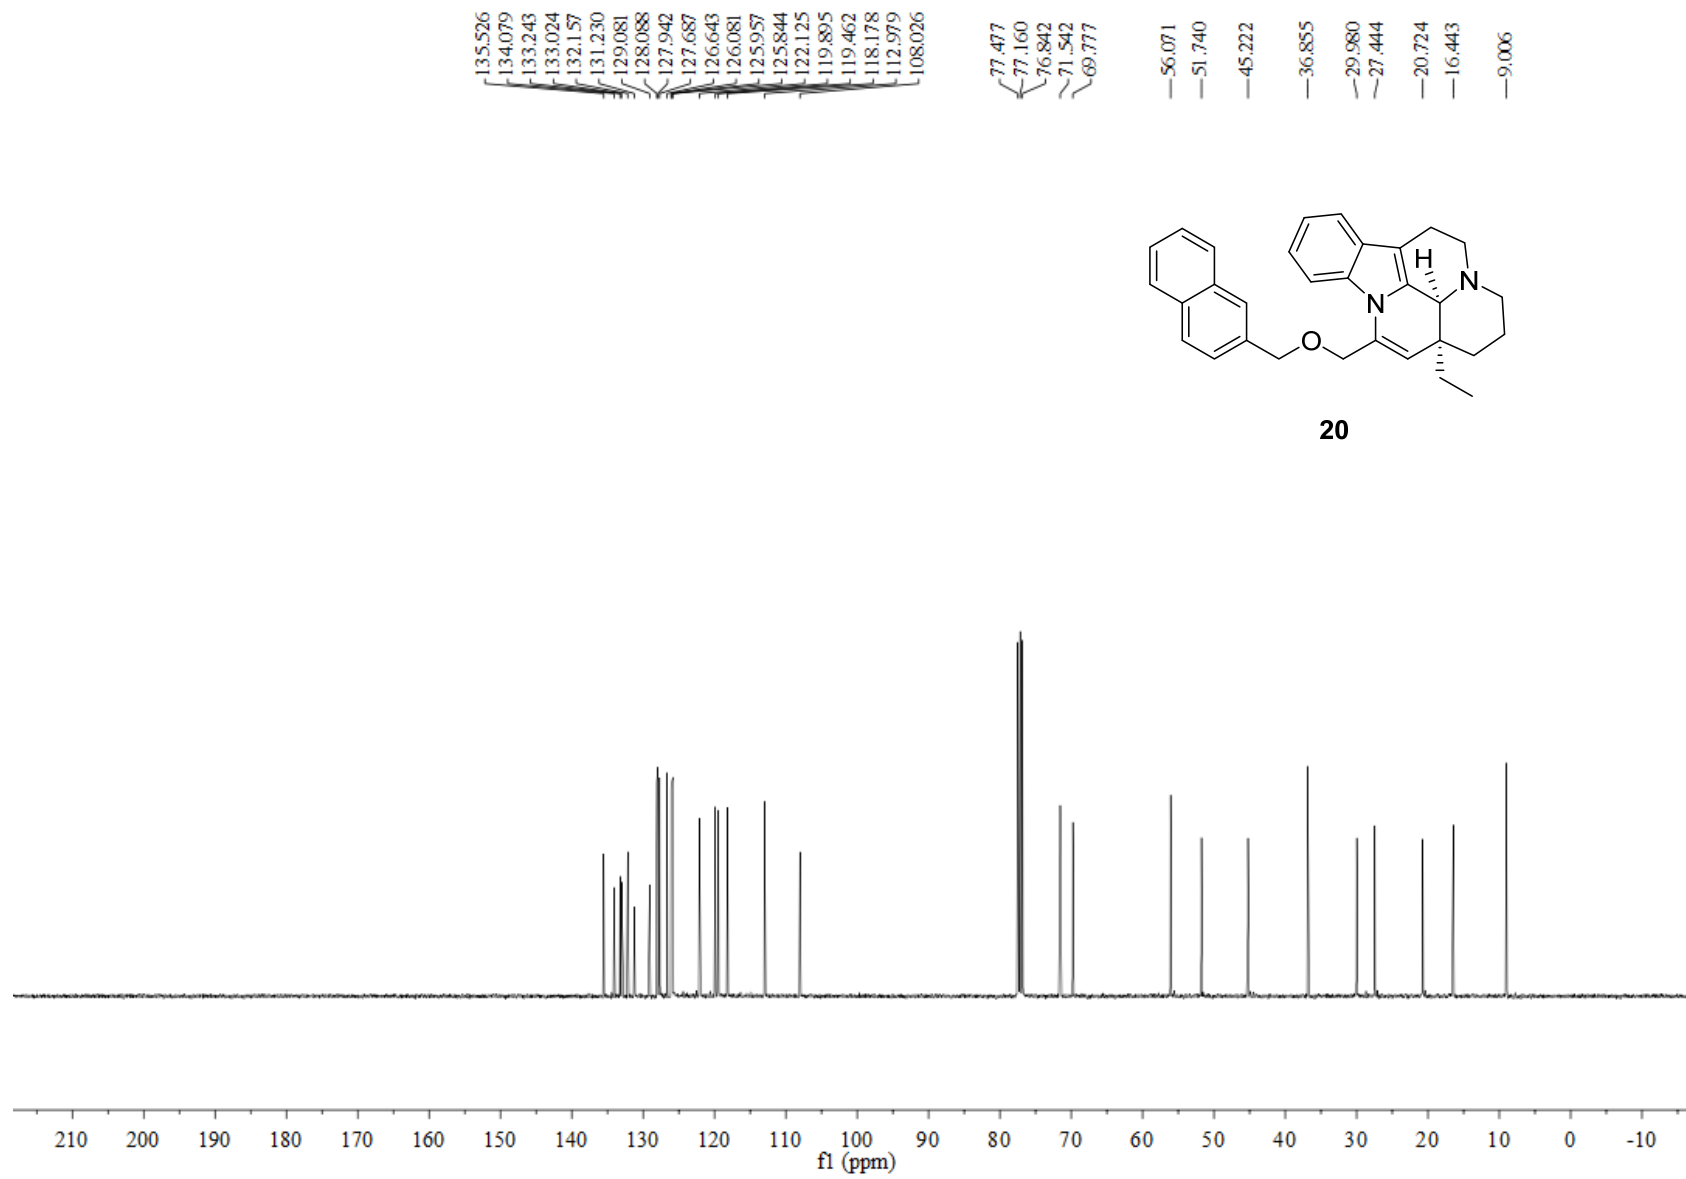

<sup>13</sup>C NMR of Compound **20** (100 MHz, CDCl<sub>3</sub>)

Item name: DB-60-29  
Item description:

Channel name: 1: Average Time 0.0788 min : TOF MS (50-1500) ESI+ : Centroided : Combined

5.46e7

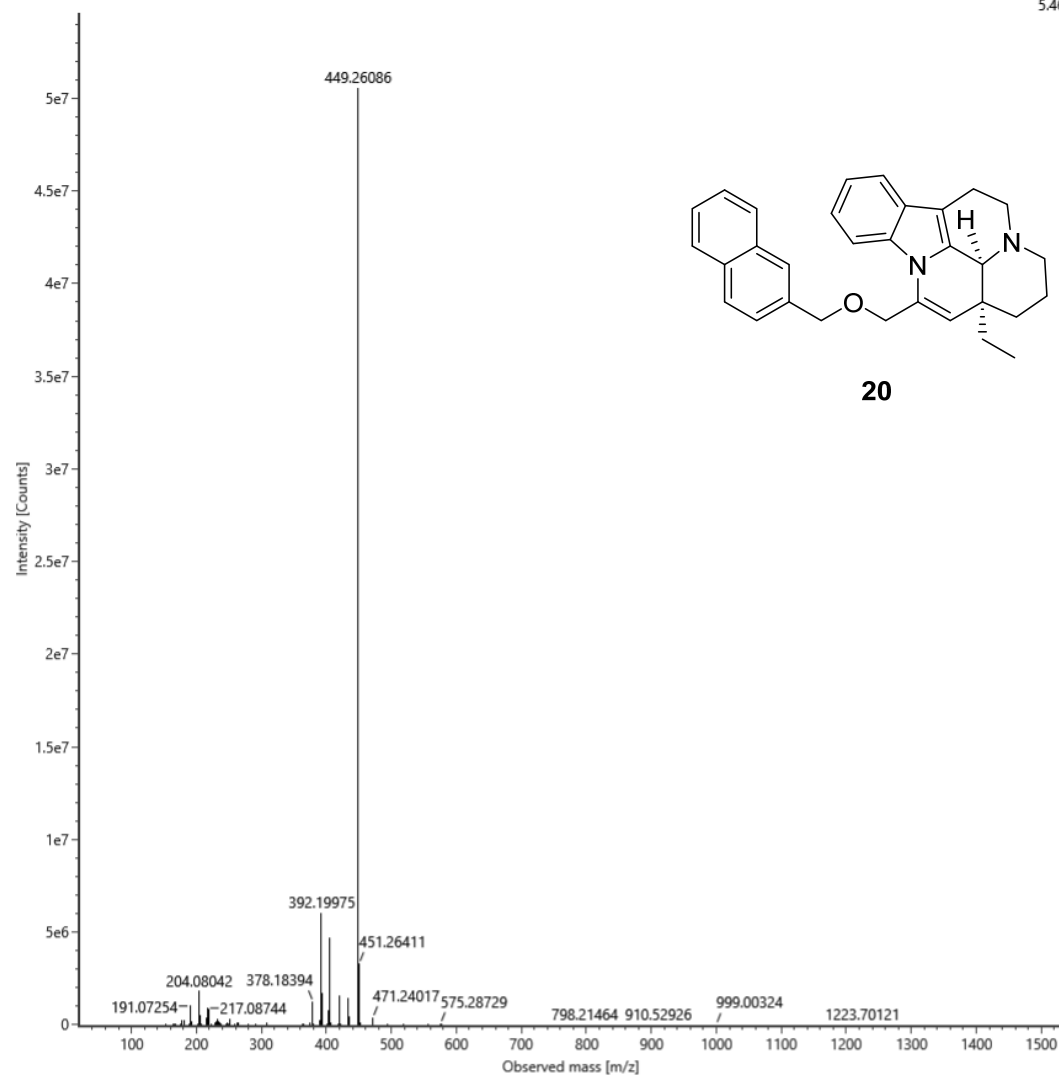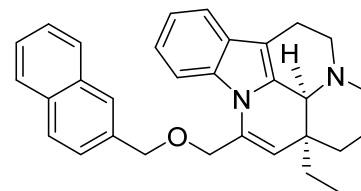

**20**

HRMS of Compound **20**

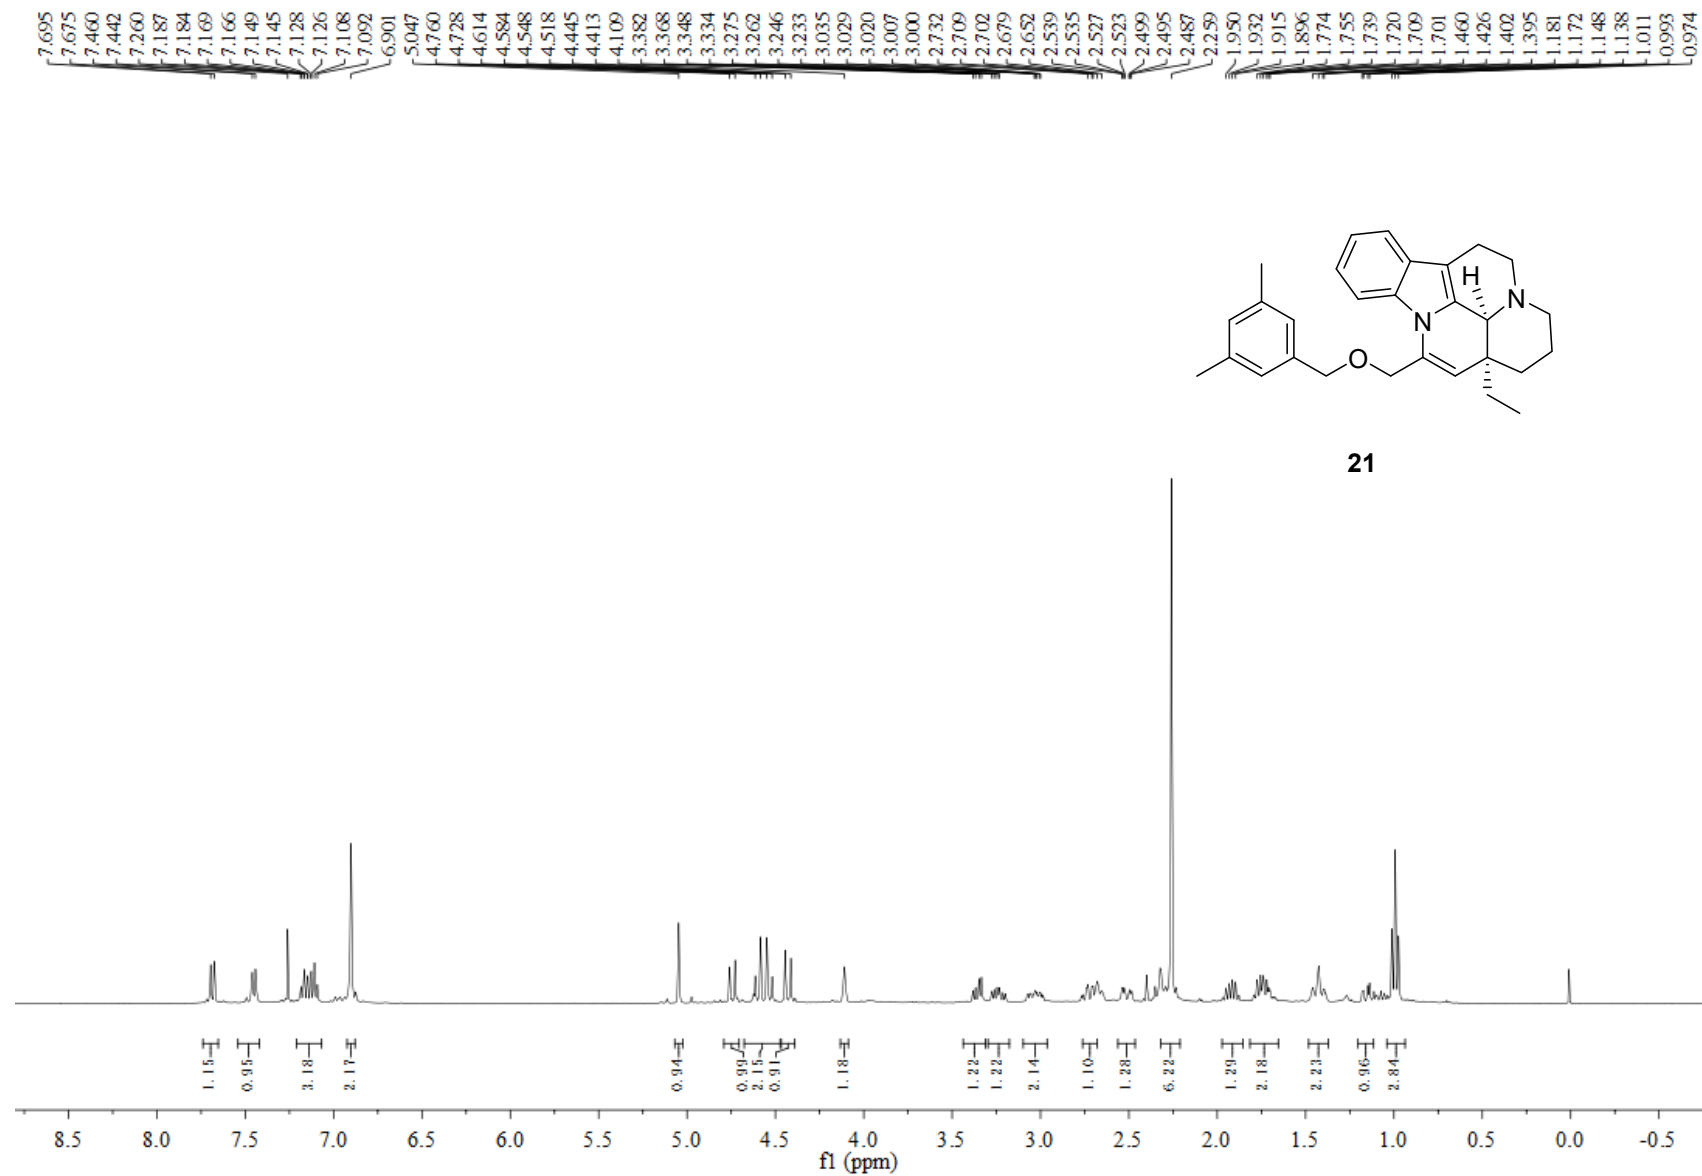

<sup>1</sup>H NMR of Compound **21** (400 MHz, CDCl<sub>3</sub>)



137.813  
137.720  
133.997  
132.090  
131.246  
129.254  
128.964  
125.801  
121.990  
119.775  
119.261  
118.039  
112.957  
107.871

77.478  
77.160  
76.842  
71.338  
69.427

56.149  
51.816

45.192

36.788

29.940  
27.411

21.253  
20.683

16.439

8.896

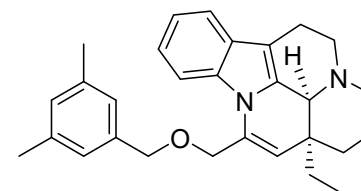

**21**

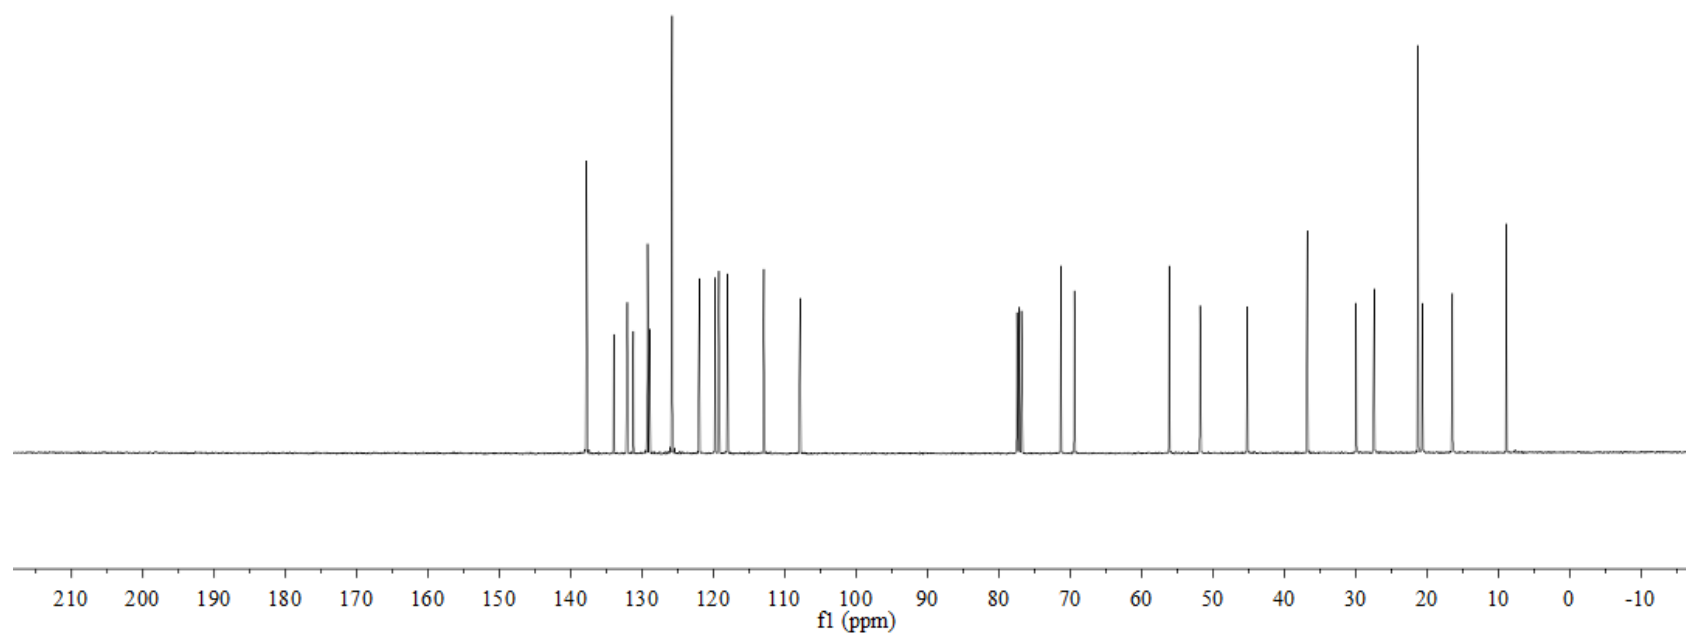

<sup>13</sup>C NMR of Compound **21** (100 MHz, CDCl<sub>3</sub>)

Item name: DB-60-19  
Item description:

Channel name: 1: Average Time 0.0874 min : TOF MS (50-1500) ESI+ : Centroided : Combined

7.46e7

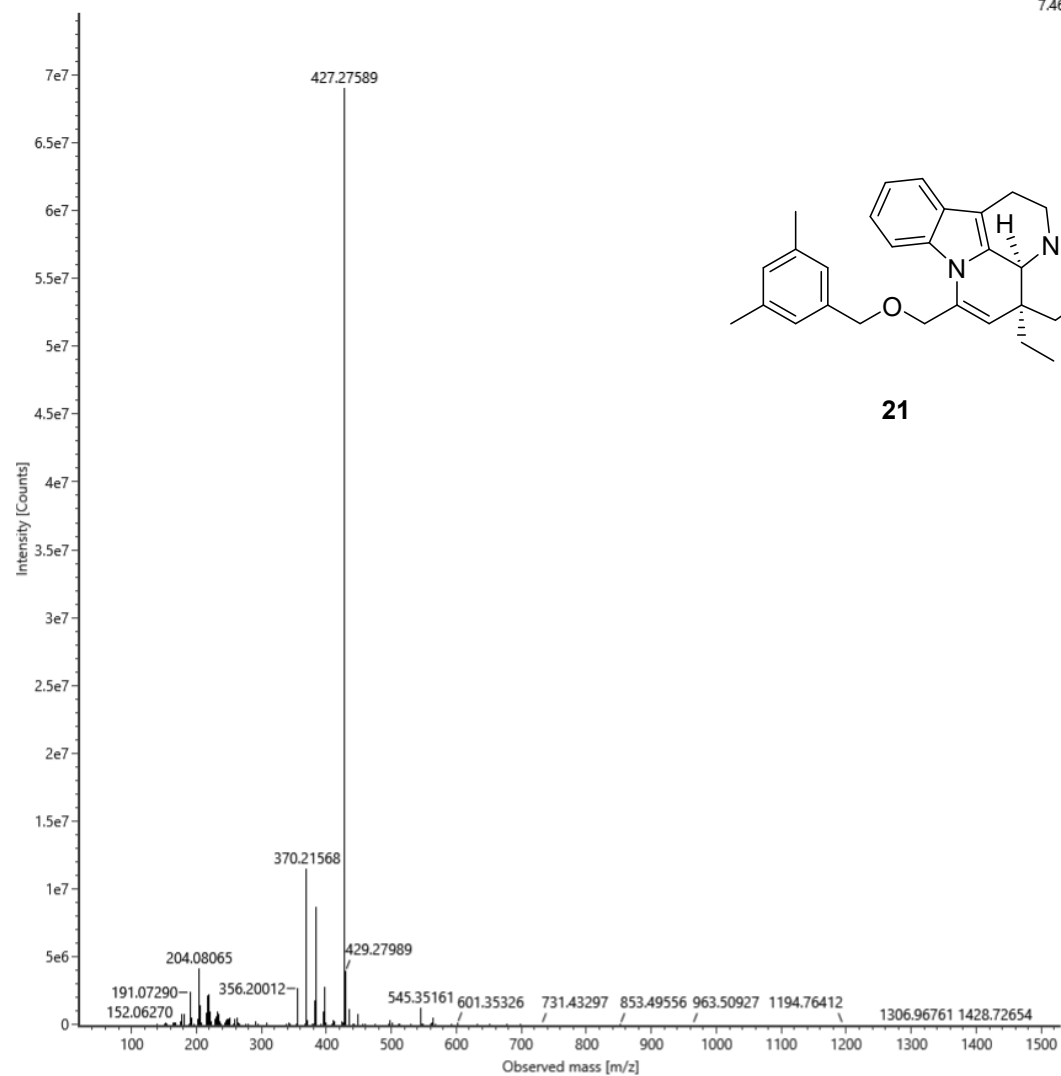

HRMS of Compound **21**

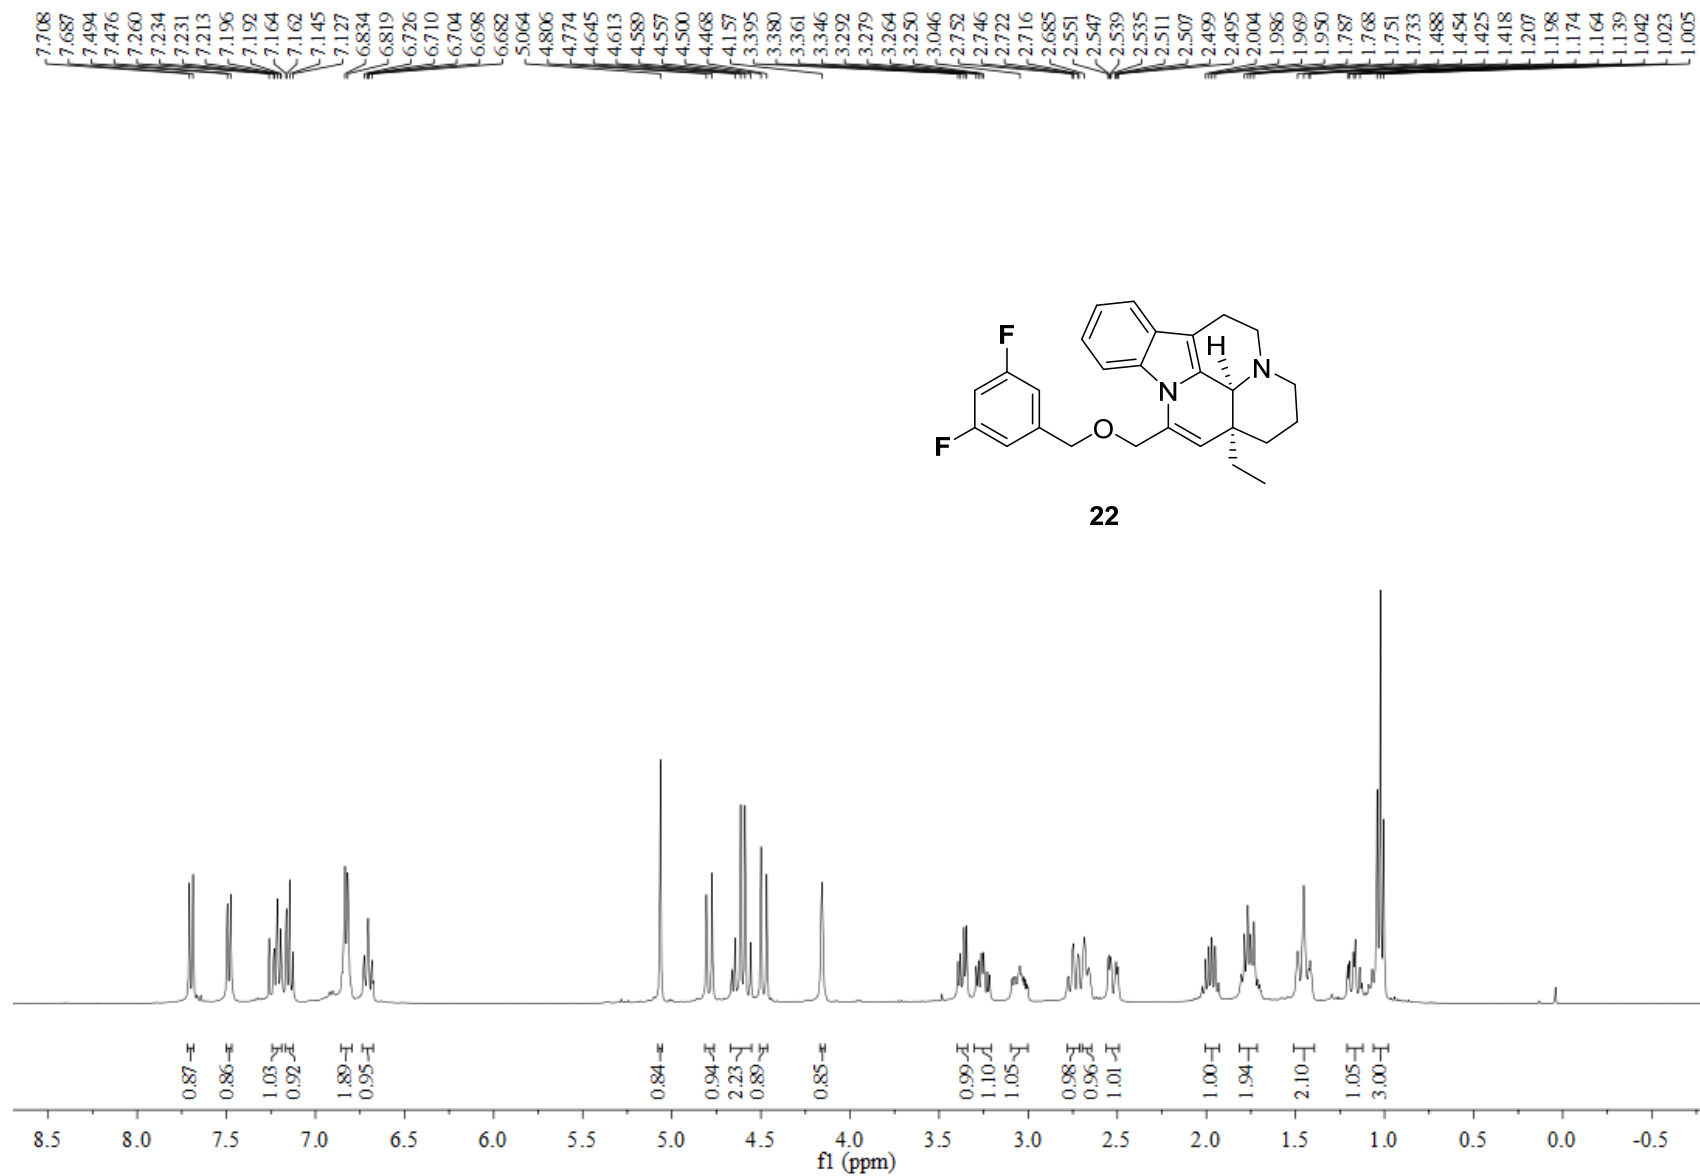

<sup>1</sup>H NMR of Compound **22** (400 MHz, CDCl<sub>3</sub>)

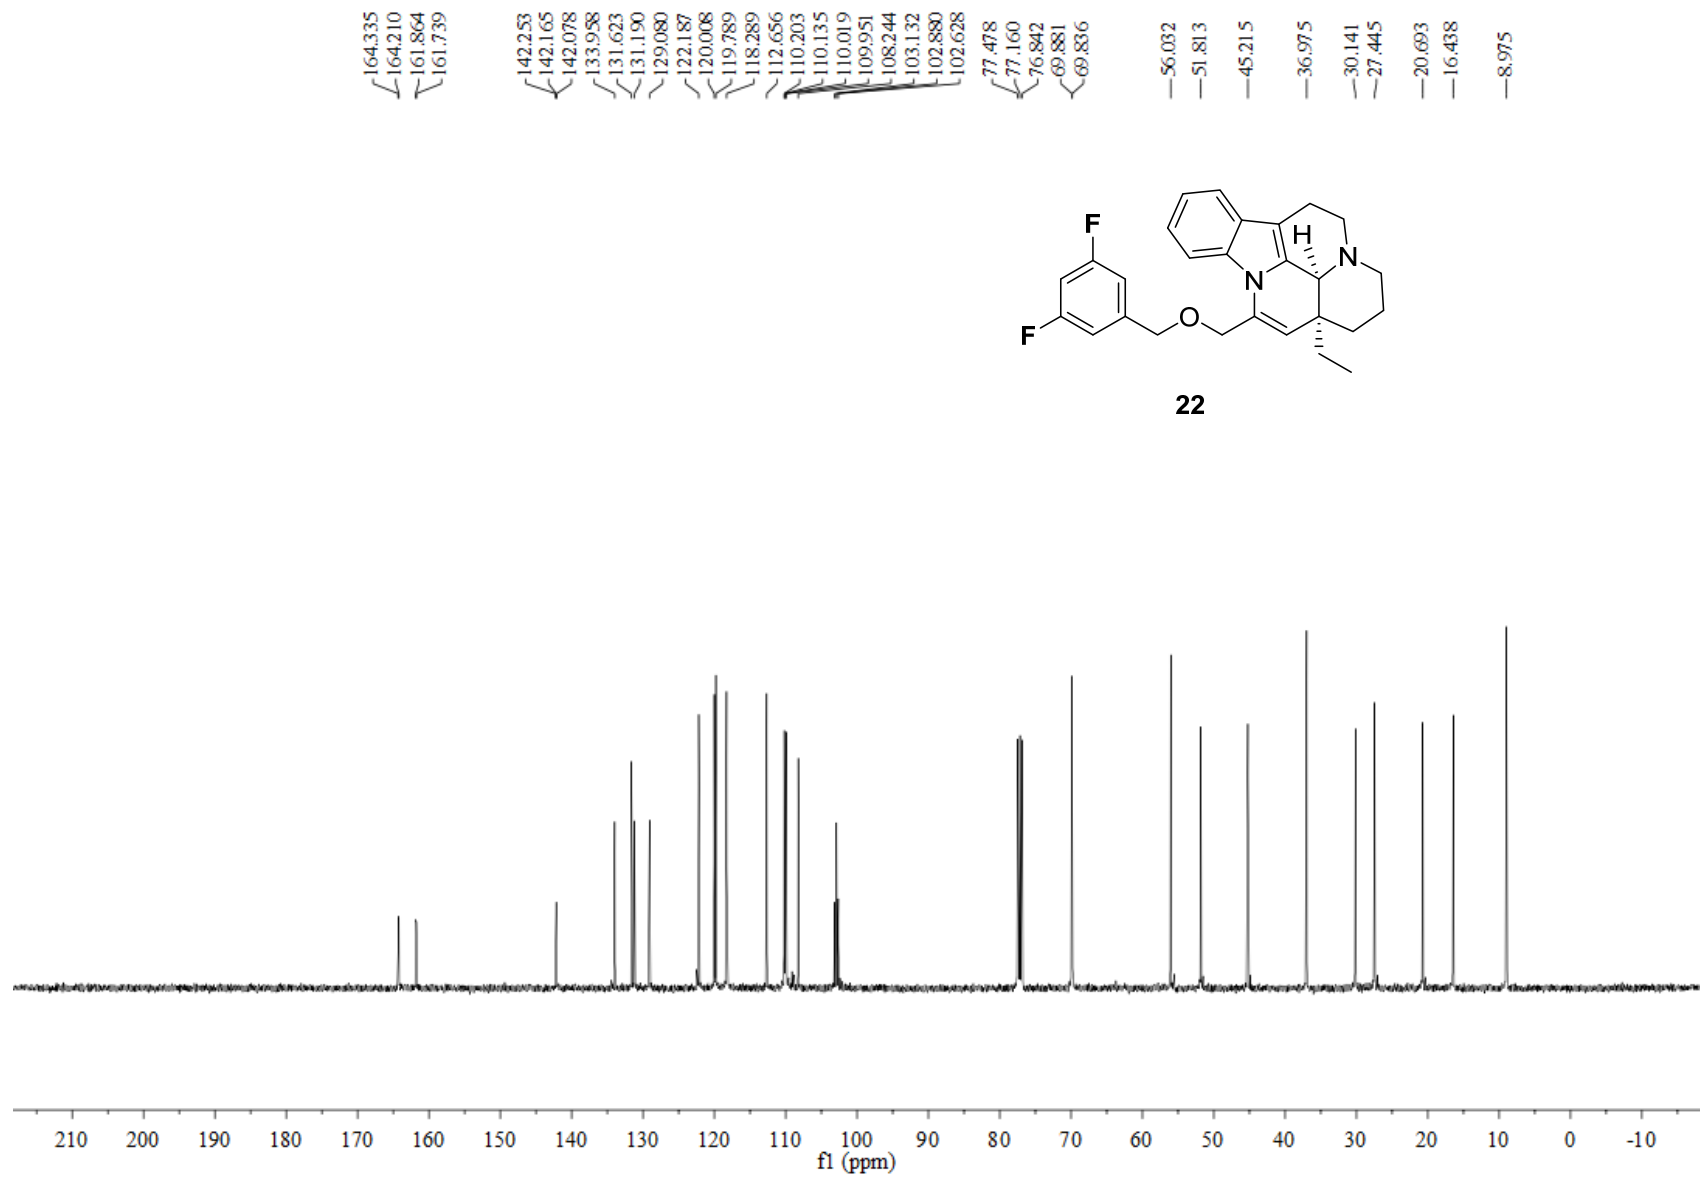

<sup>13</sup>C NMR of Compound **22** (100 MHz, CDCl<sub>3</sub>)

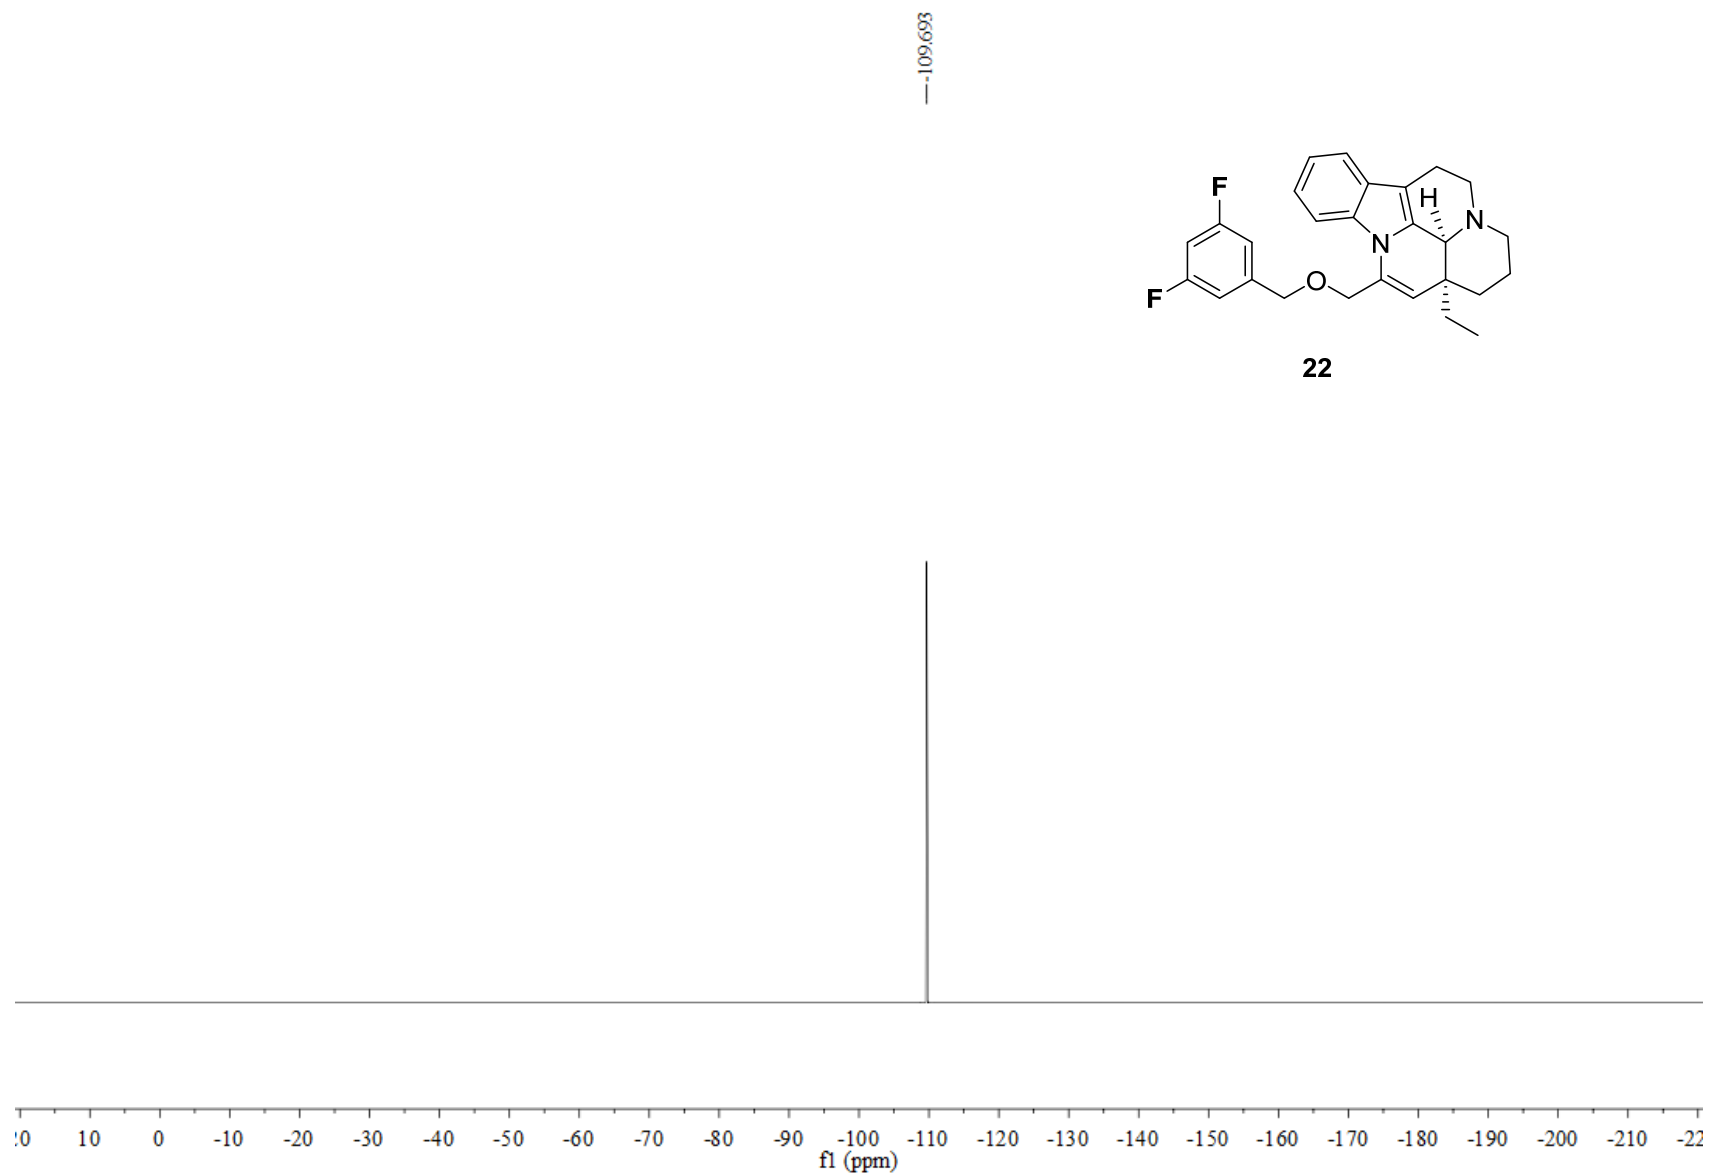

Item name: DB-60-18  
Item description:

Channel name: 1: Average Time 0.0831 min : TOF MS (50-1500) ESI+ : Centroided : Combined

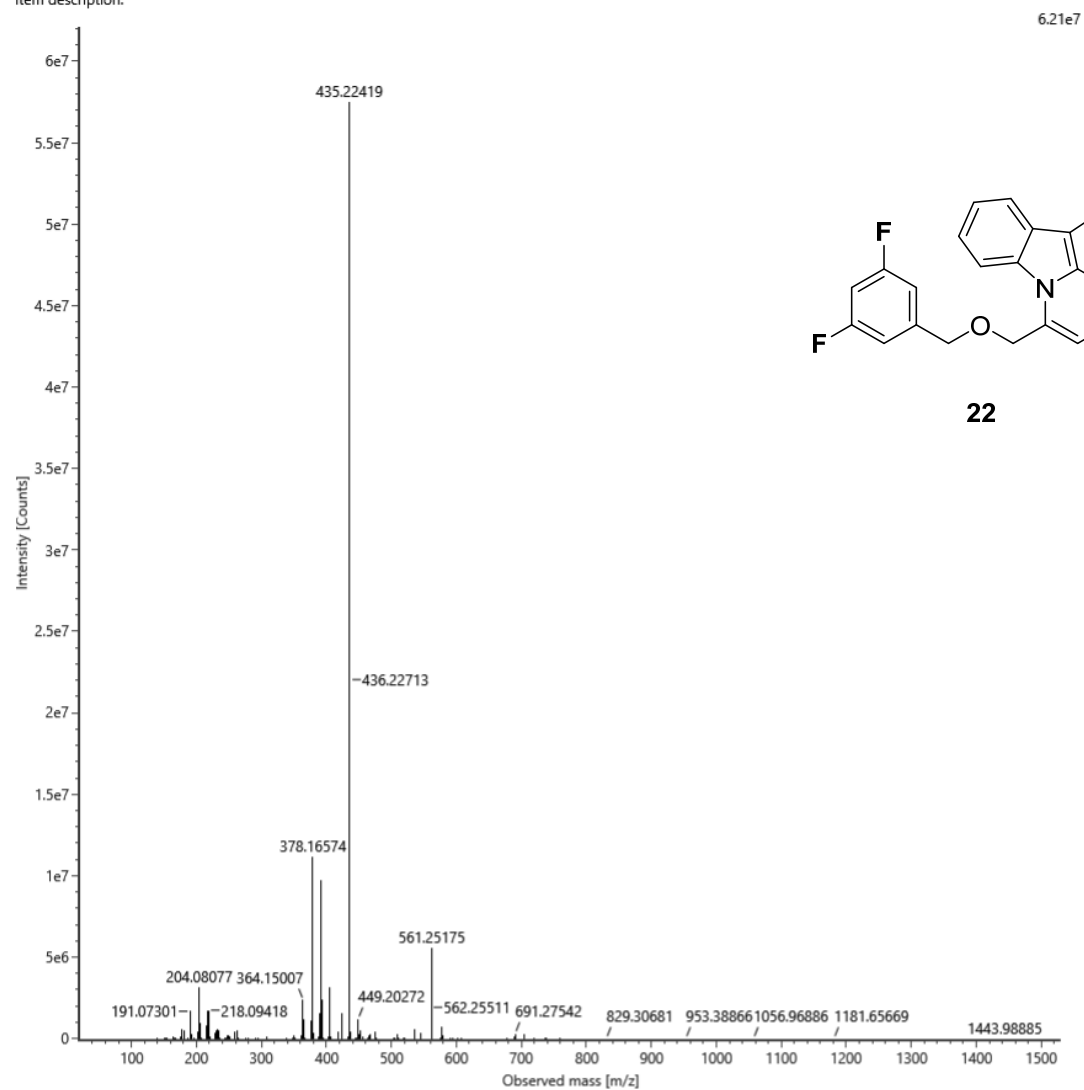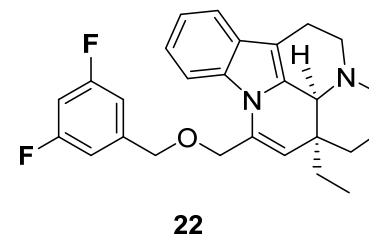

HRMS of Compound **22**

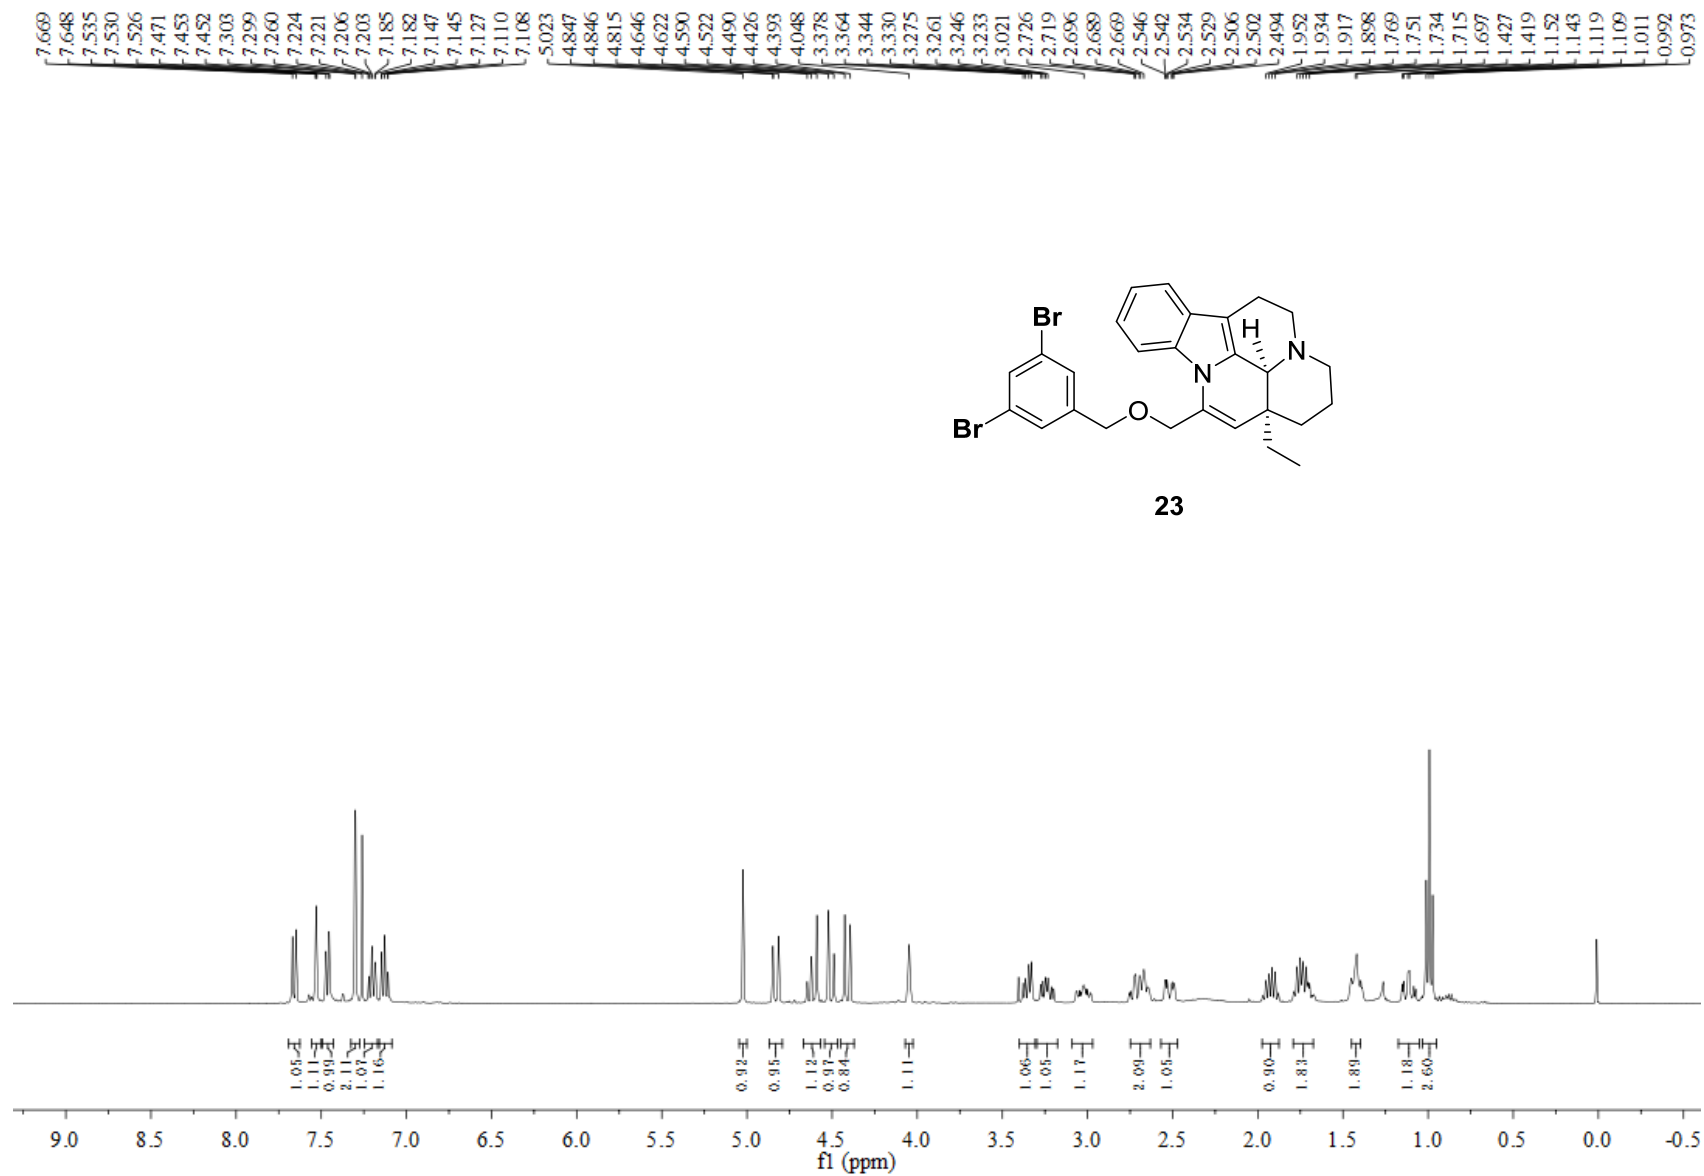

<sup>1</sup>H NMR of Compound **23** (400 MHz, CDCl<sub>3</sub>)

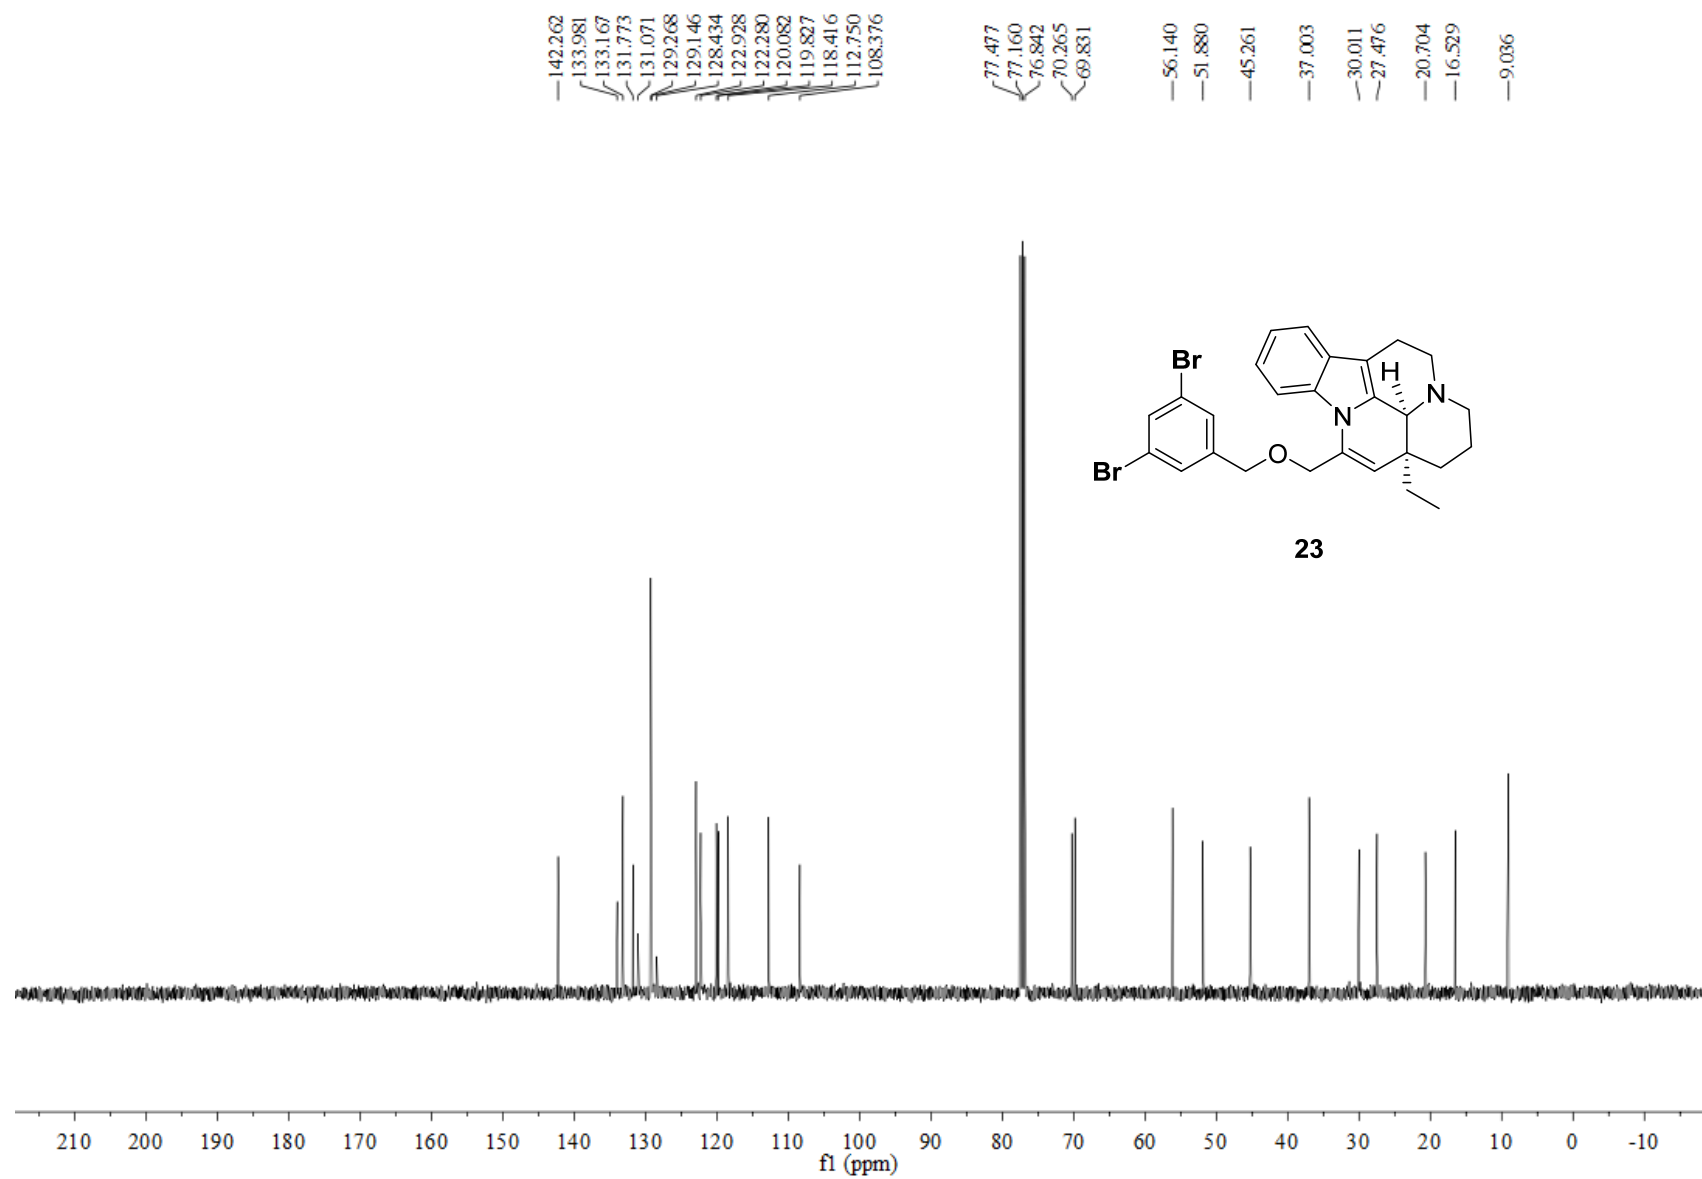

<sup>13</sup>C NMR of Compound **23** (100 MHz, CDCl<sub>3</sub>)



Item name: DB-60-16  
Item description:

Channel name: 1: Average Time 0.0788 min : TOF MS (50-1500) ESI+ : Centroided : Combined

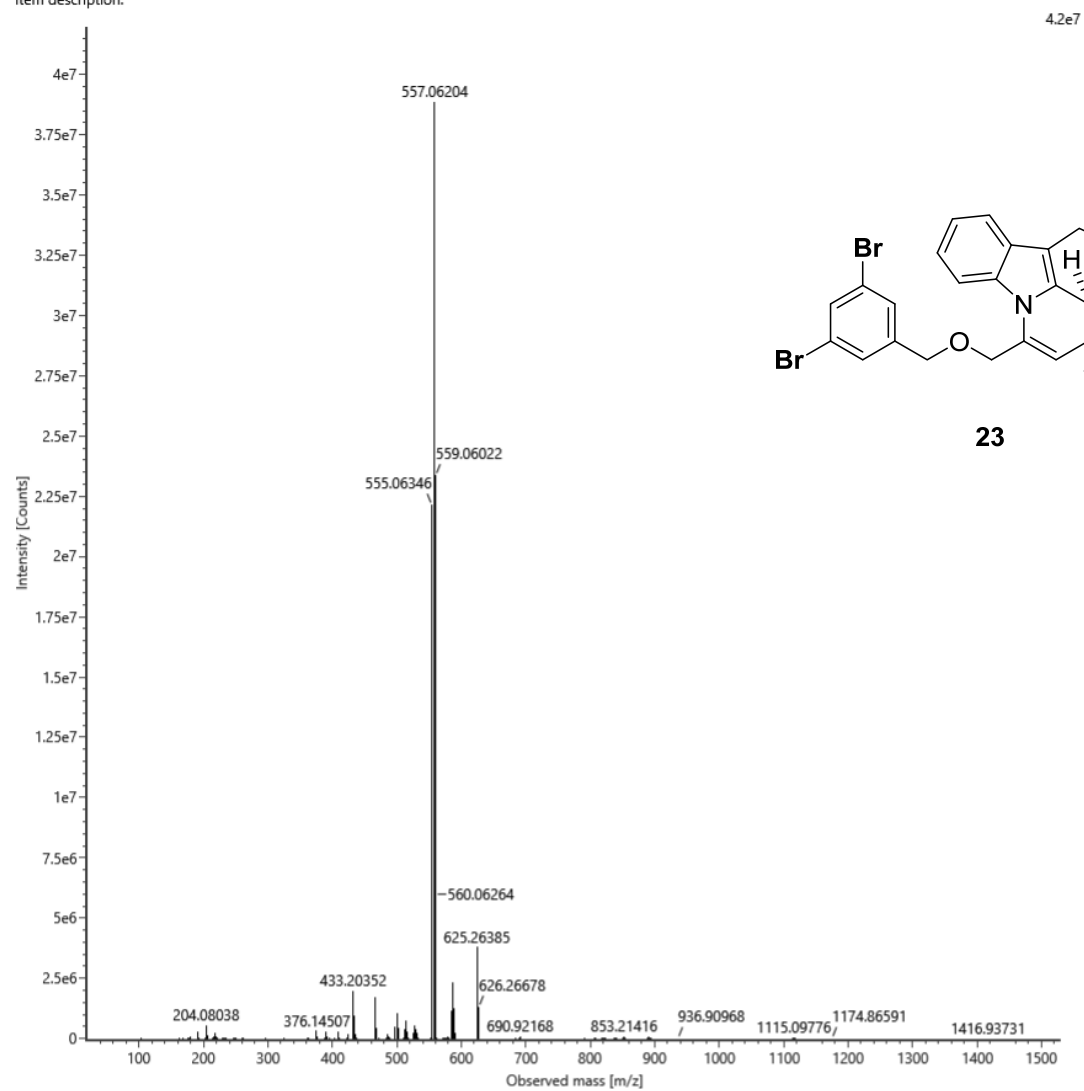

HRMS of Compound **23**

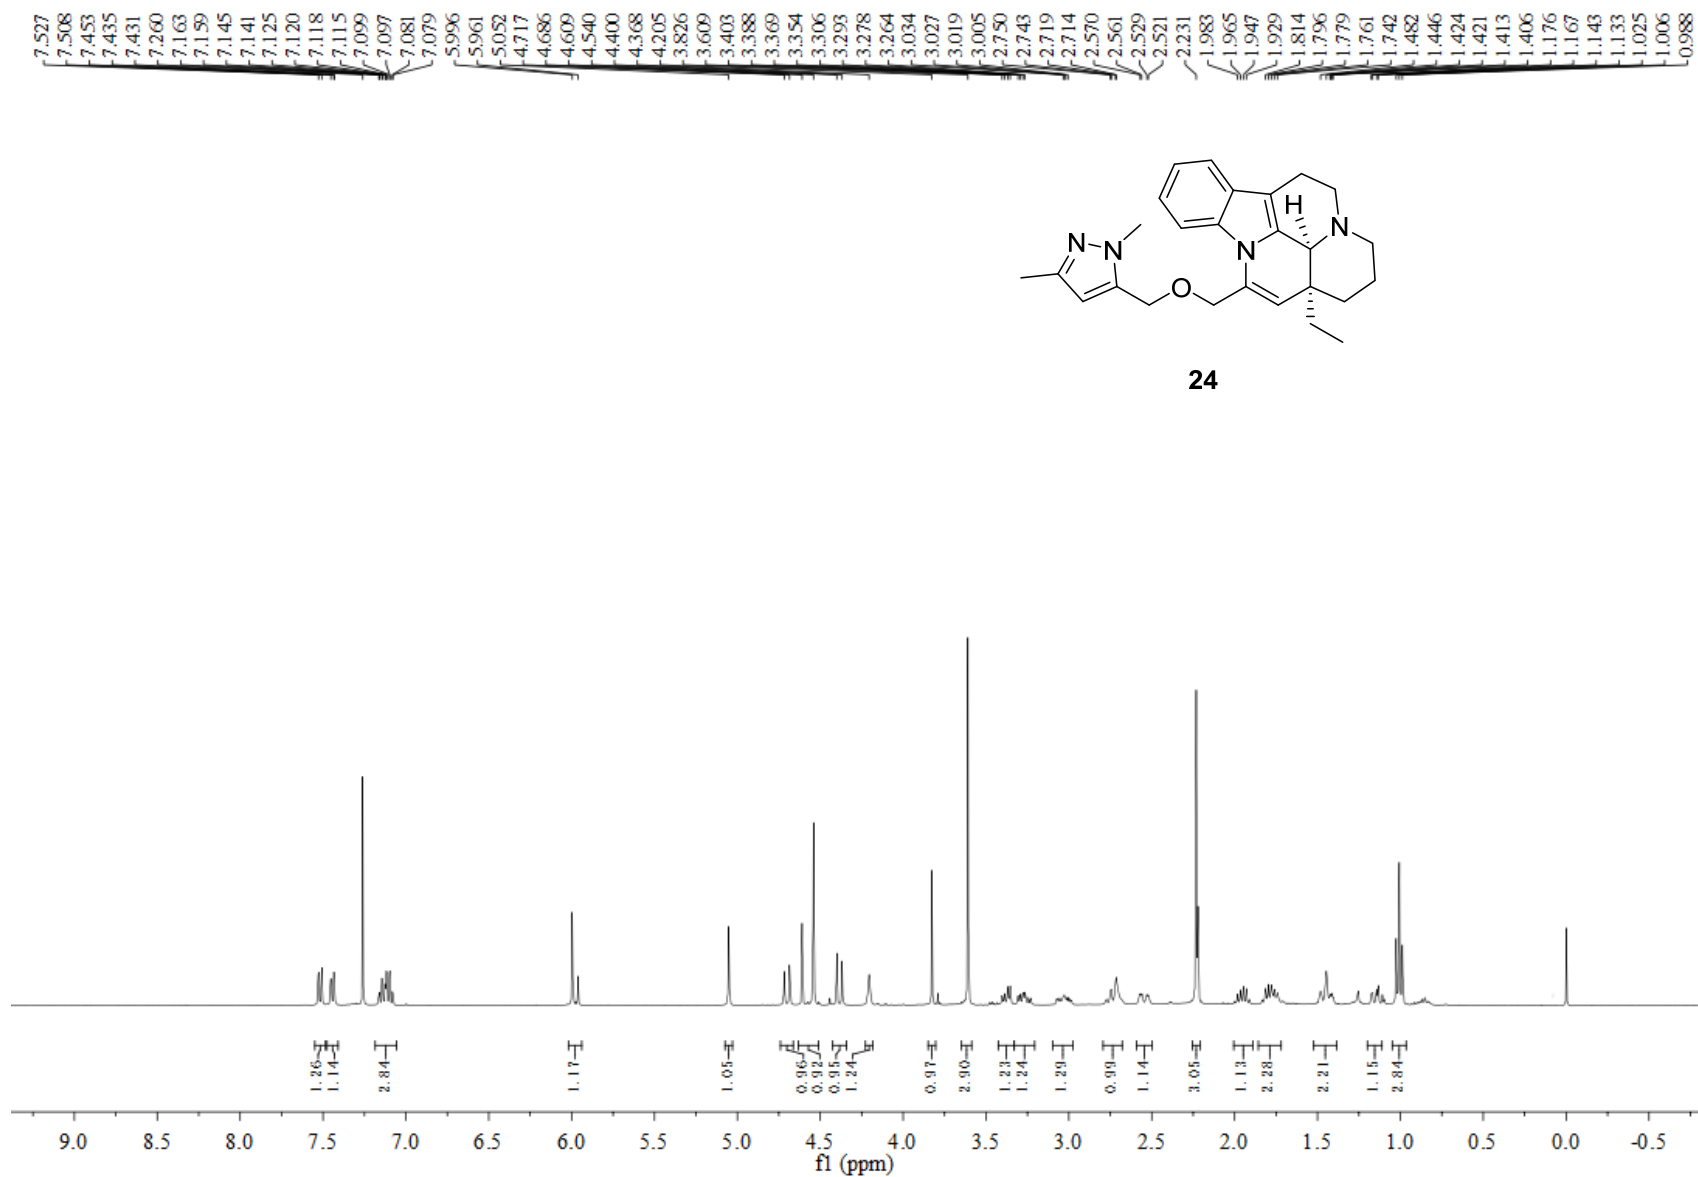

<sup>1</sup>H NMR of Compound 24 (400 MHz, CDCl<sub>3</sub>)

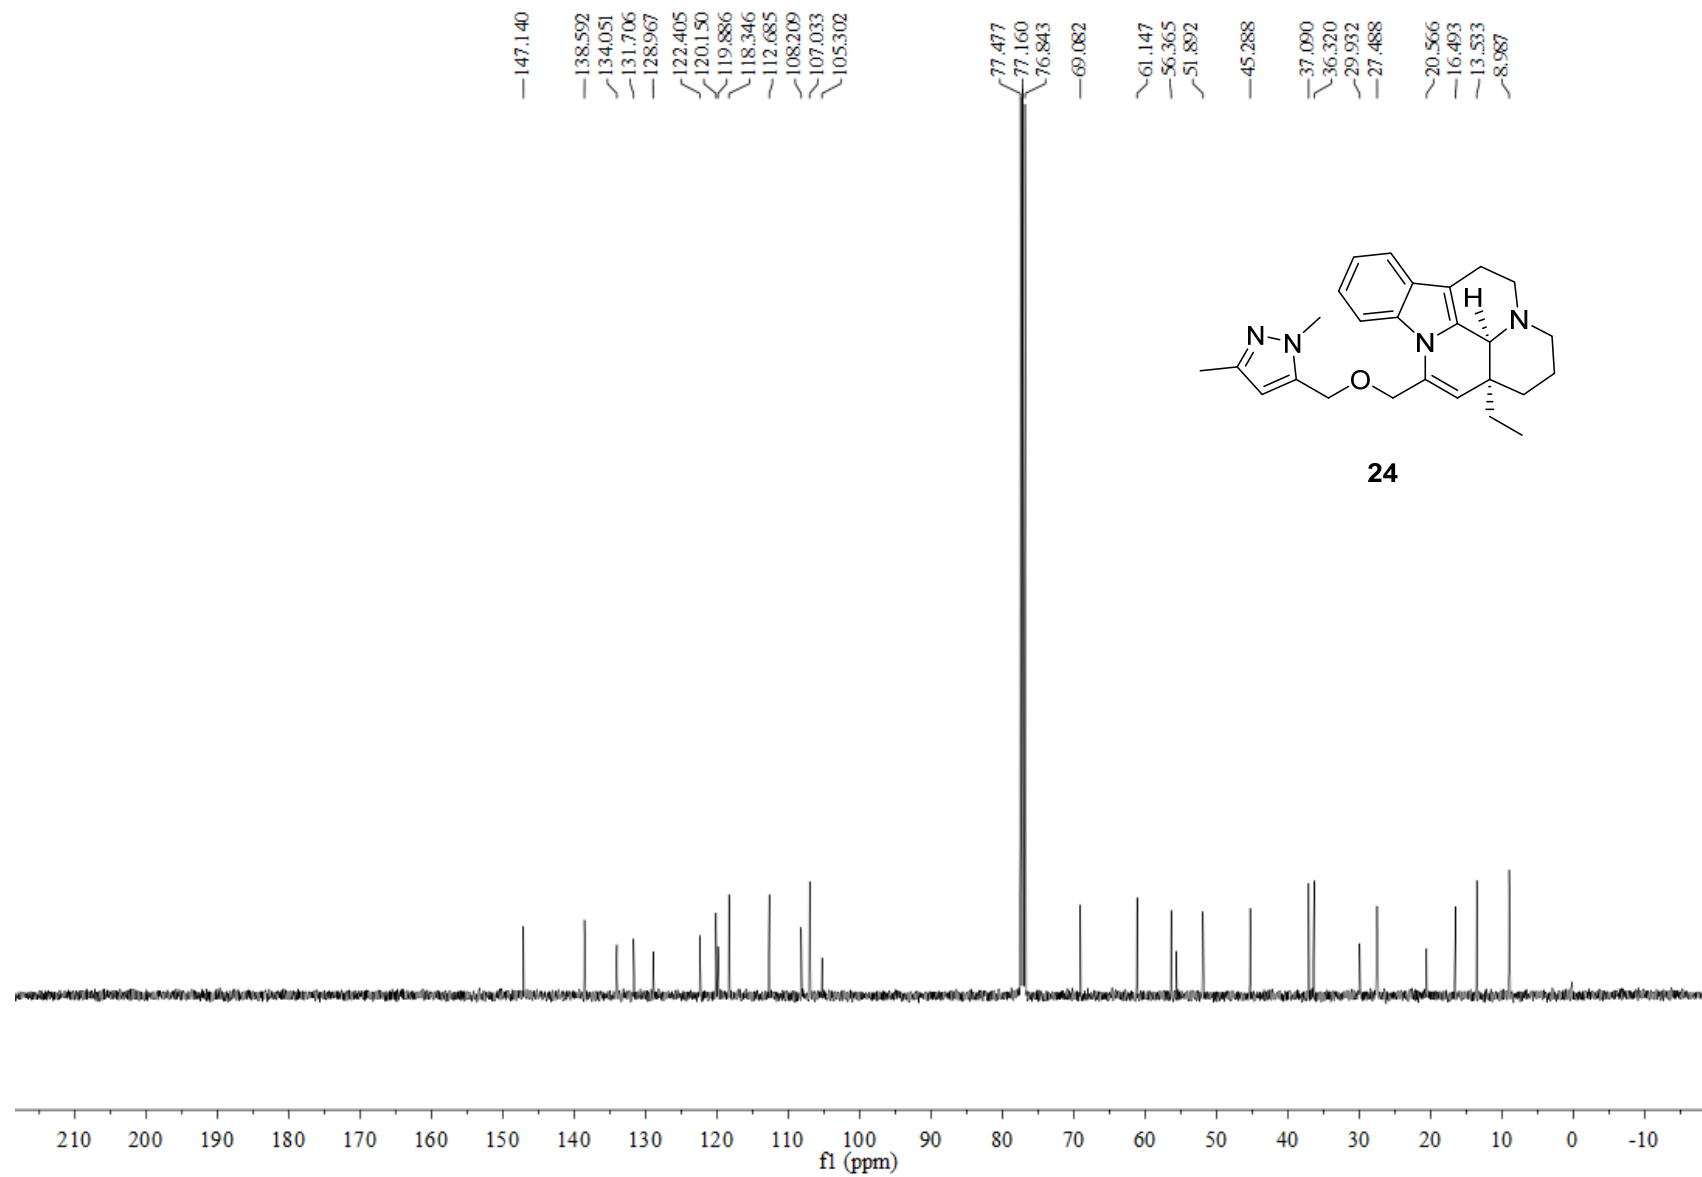

<sup>13</sup>C NMR of Compound **24** (100 MHz, CDCl<sub>3</sub>)

Item name: DB-60-21  
Item description:

Channel name: 1: Average Time 0.0831 min : TOF MS (50-1500) ESI+ : Centroided : Combined

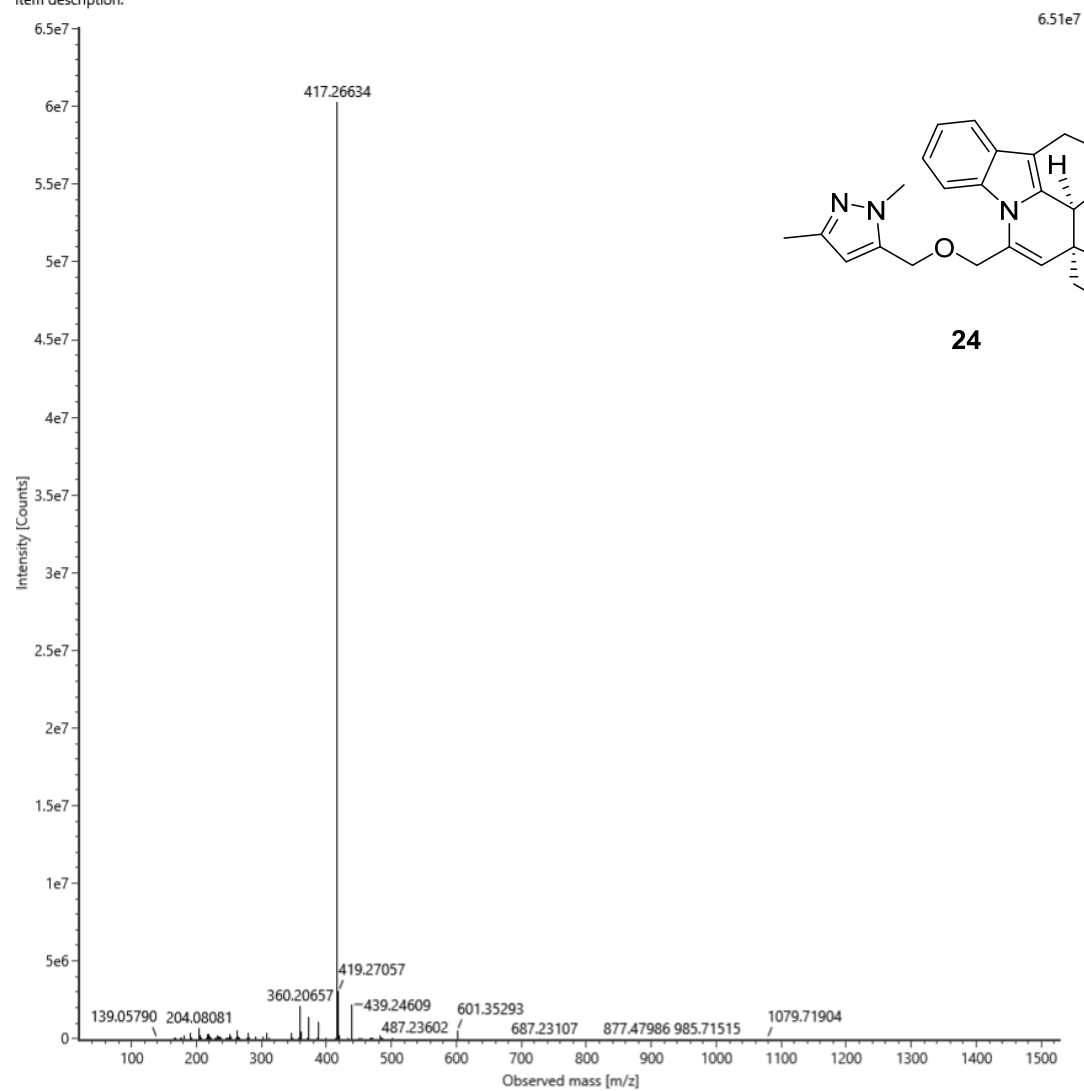

HRMS of Compound **24**

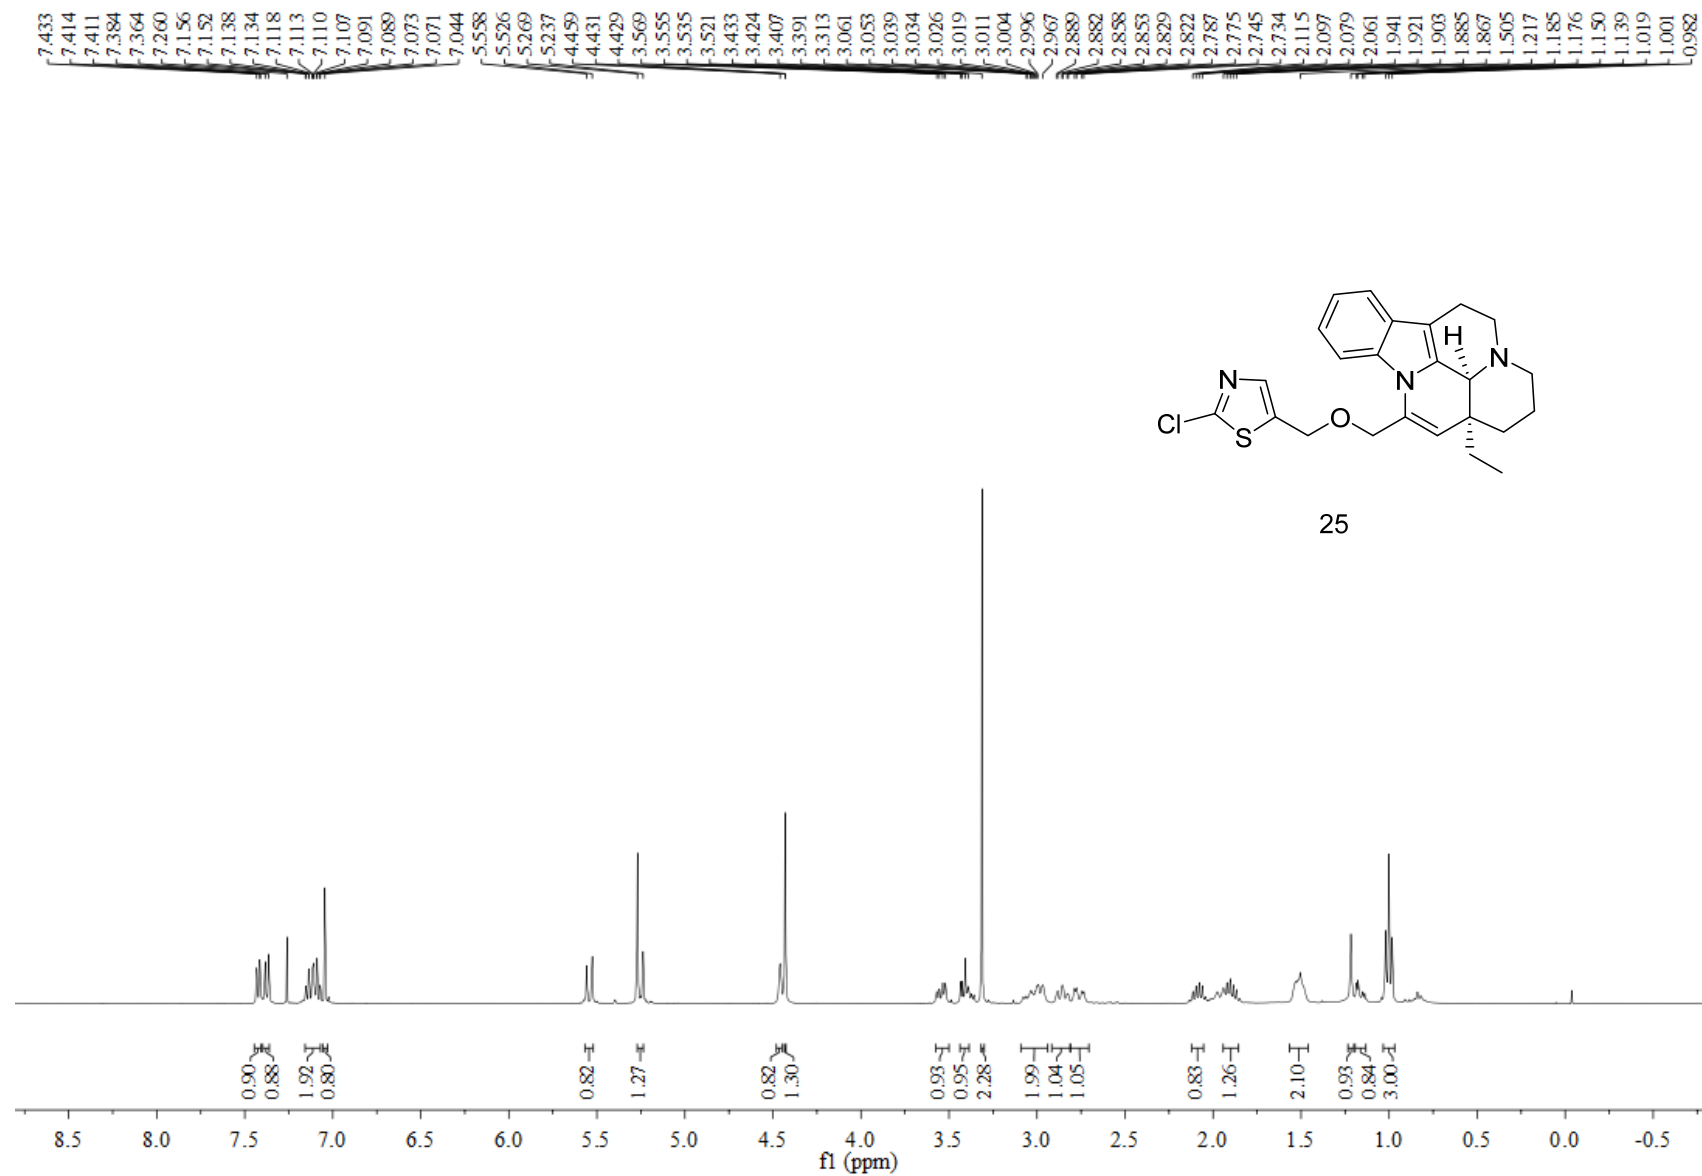

<sup>1</sup>H NMR of Compound **25** (400 MHz, CDCl<sub>3</sub>)

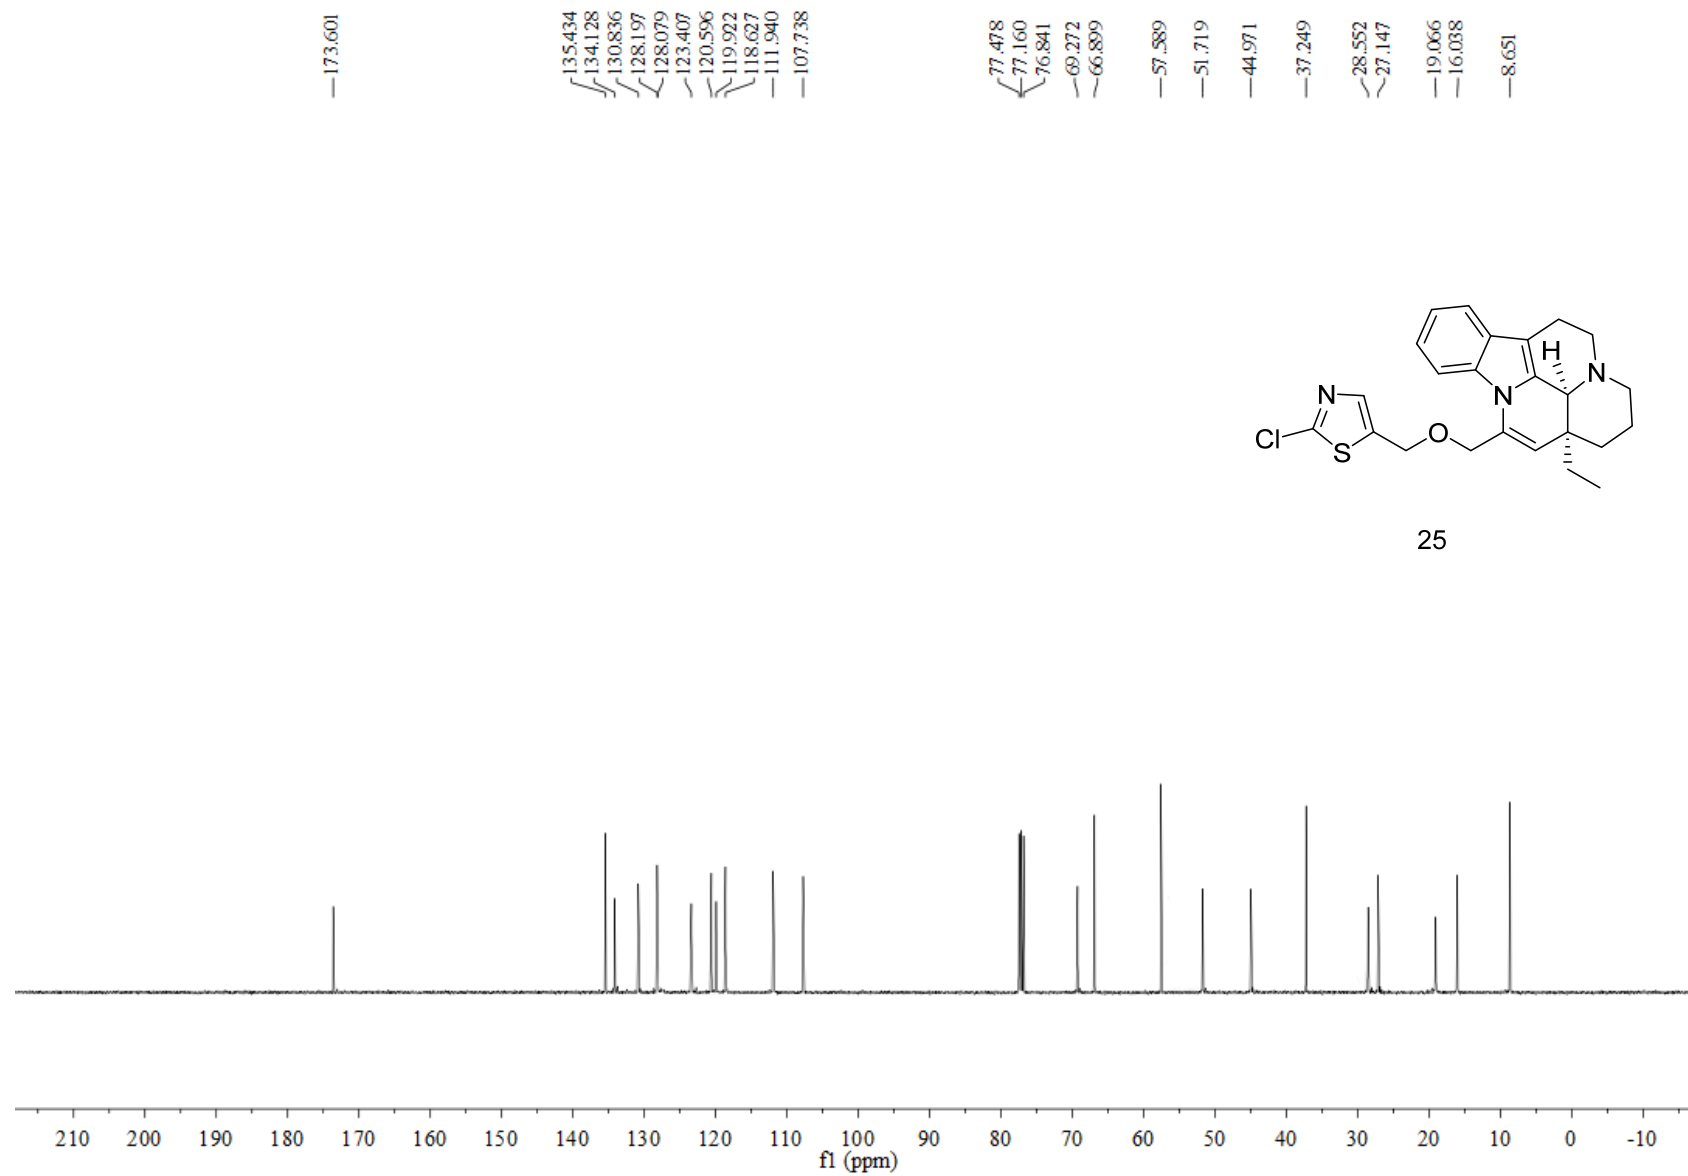

<sup>13</sup>C NMR of Compound **25** (100 MHz, CDCl<sub>3</sub>)

Item name: DB-60-17-2  
Item description:

Channel name: 1: Average Time 0.1174 min : TOF MS (50-1500) ESI+ : Centroided : Combined

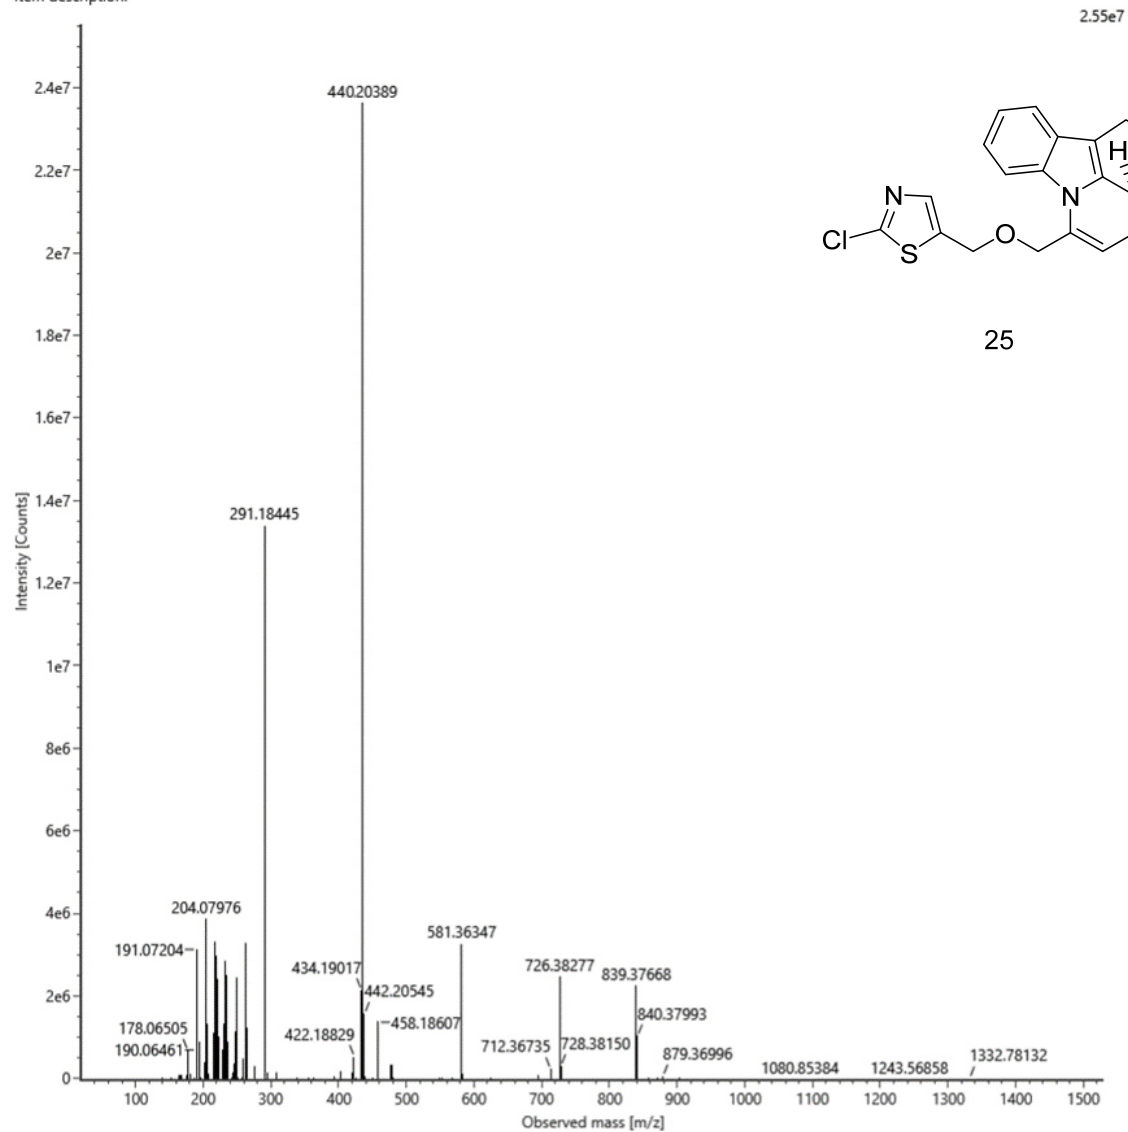

HRMS of Compound 25
